# Supplementary figures and images for: ortho-Amide-directed 2,4-dibromohydration of conjugated enynes
Source: Royal Society of Chemistry journal article supplement (doi:10.1039/c9qo00540d), 2019-01-01

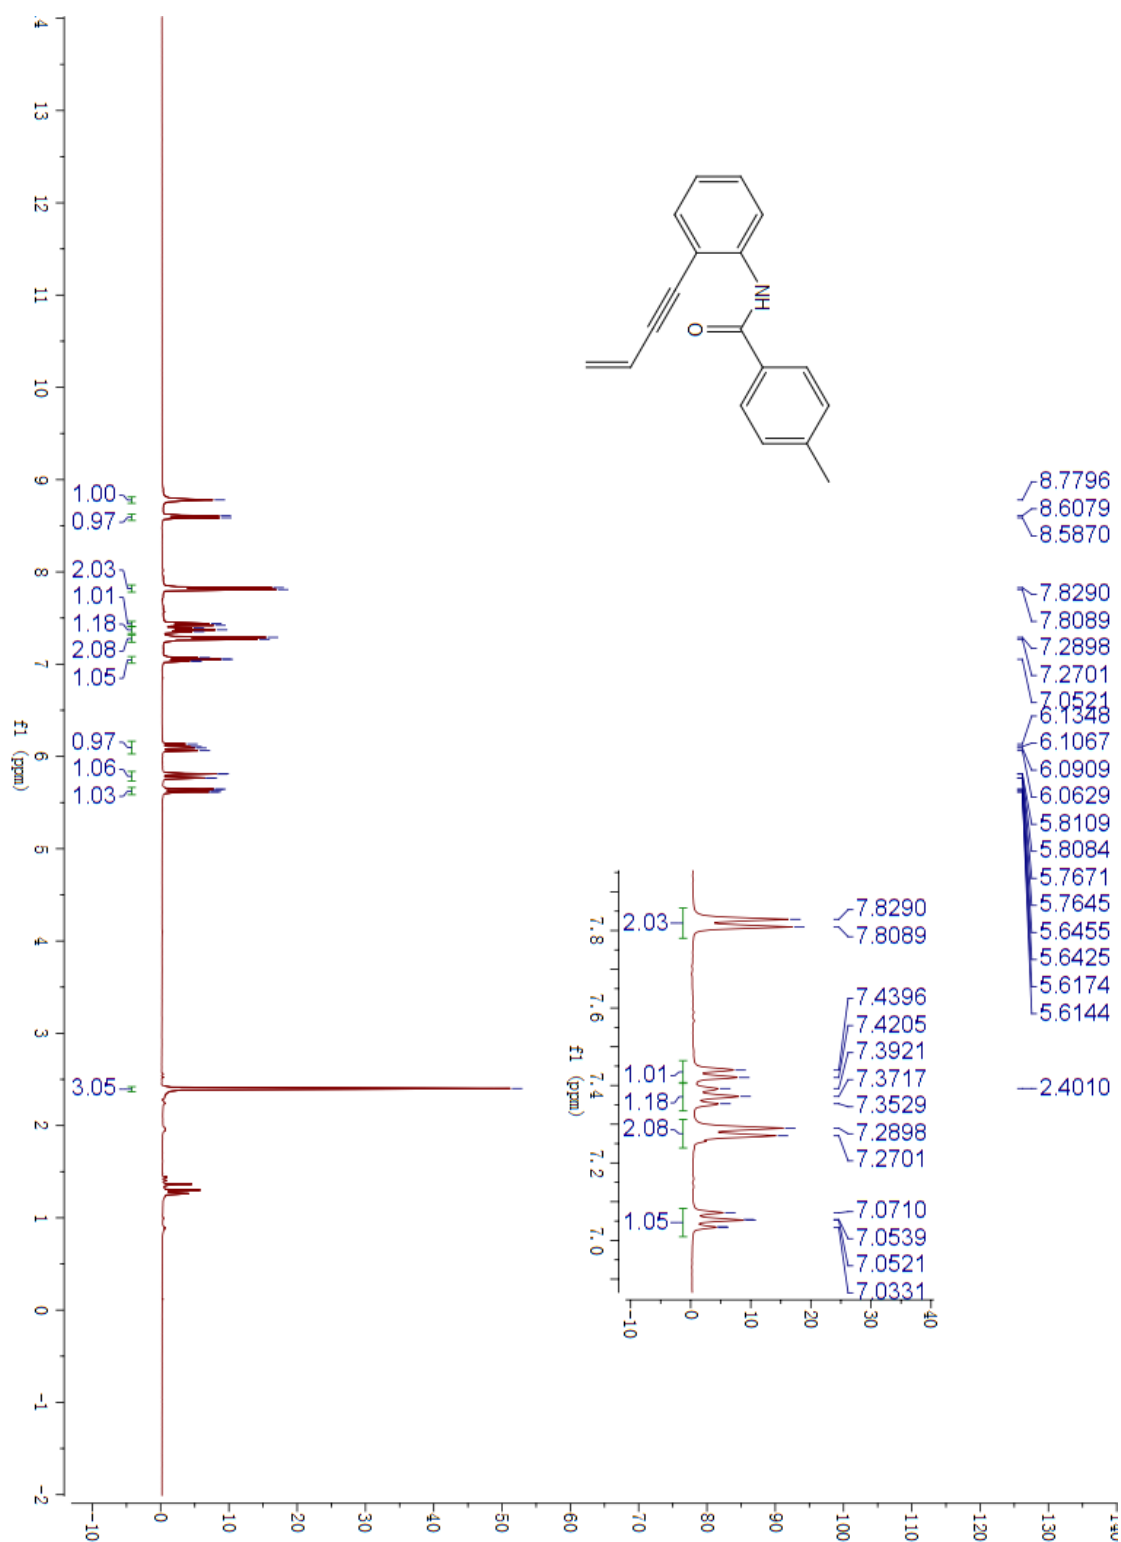

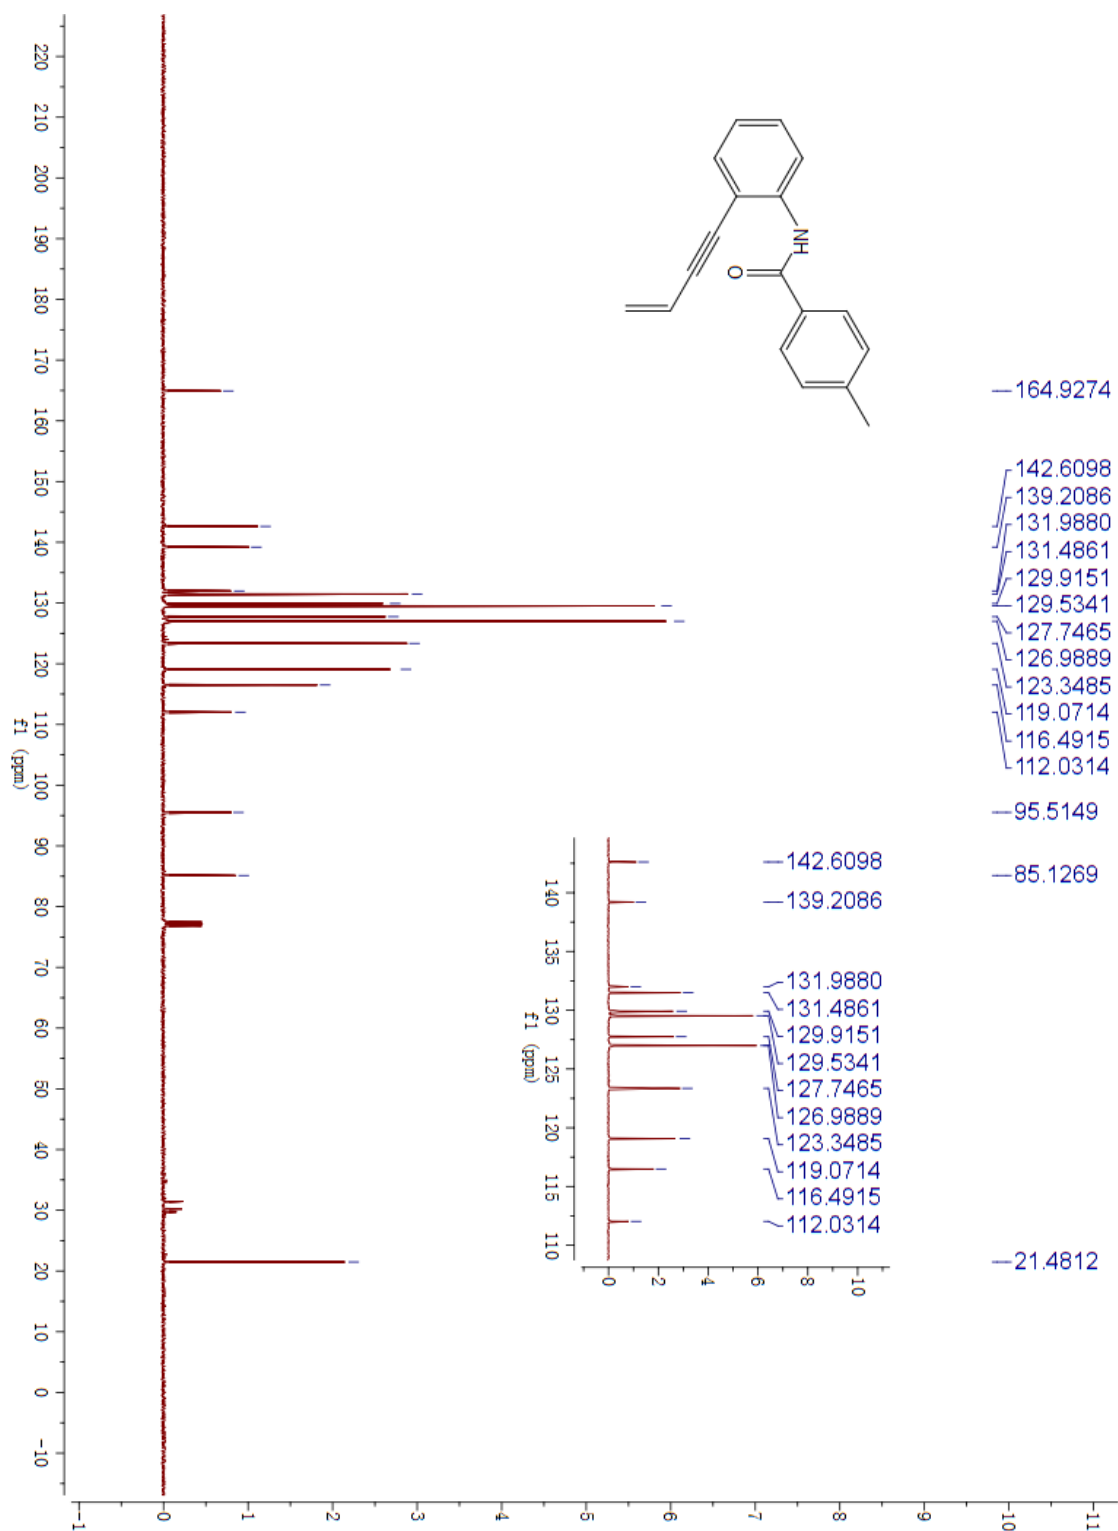

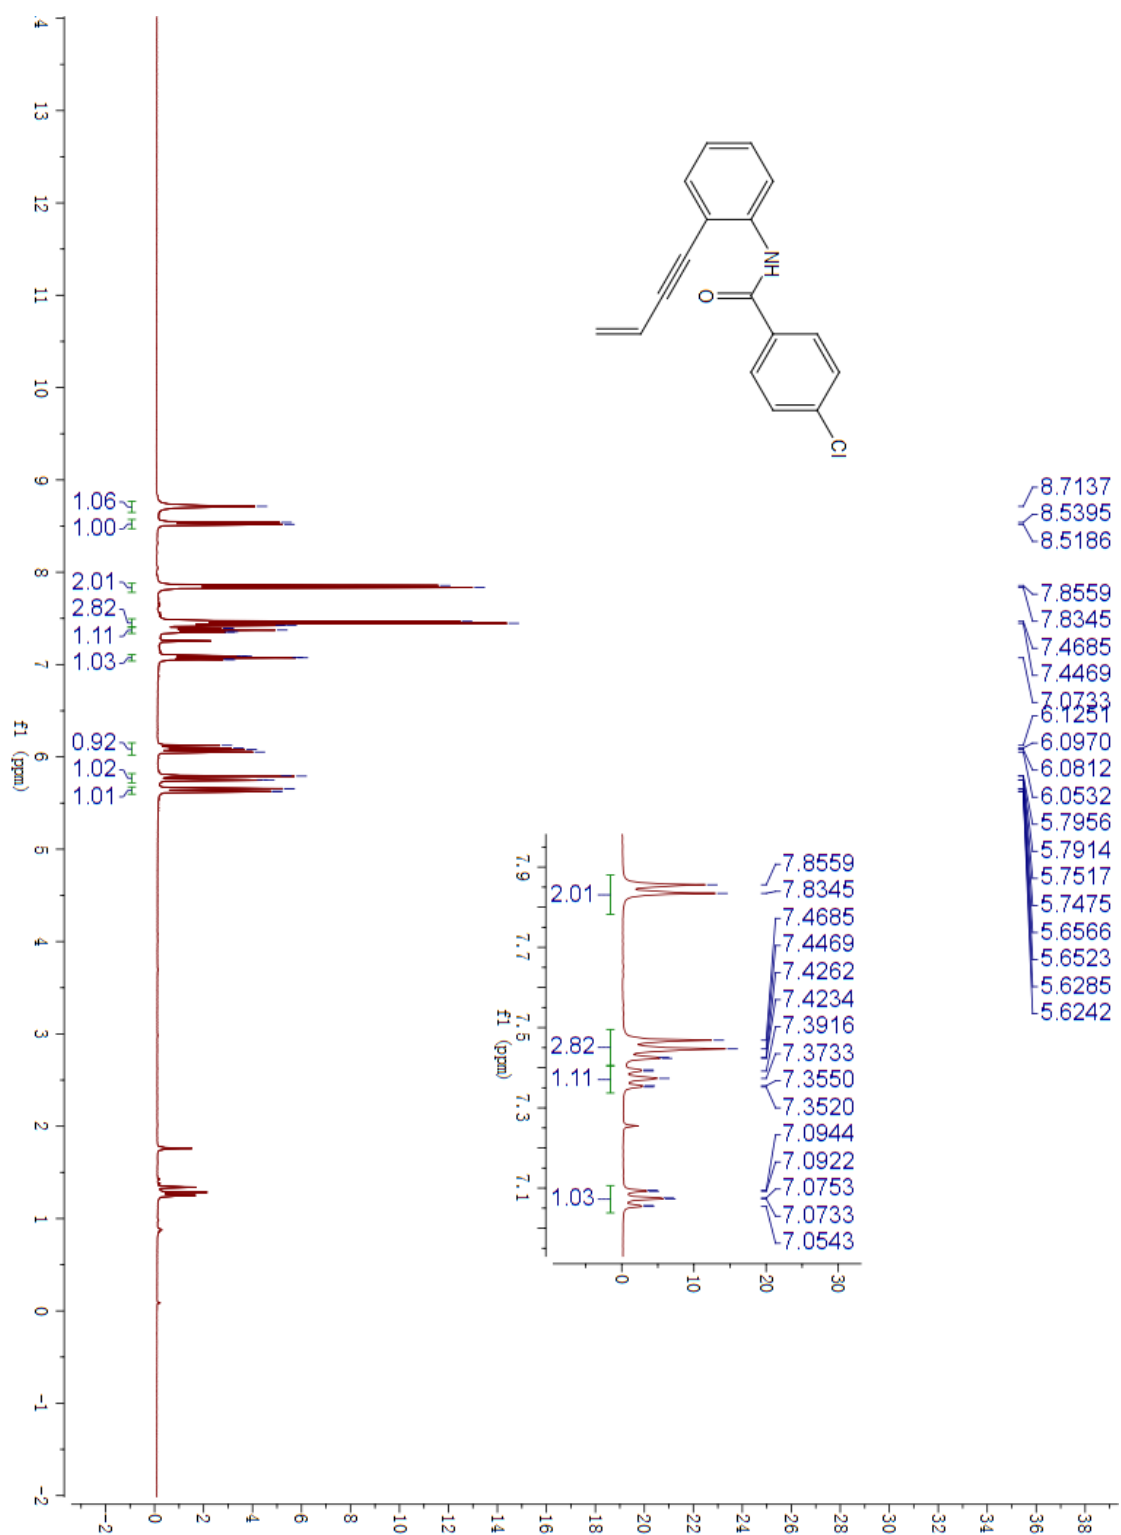

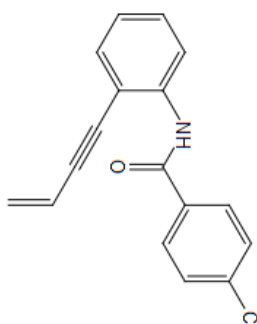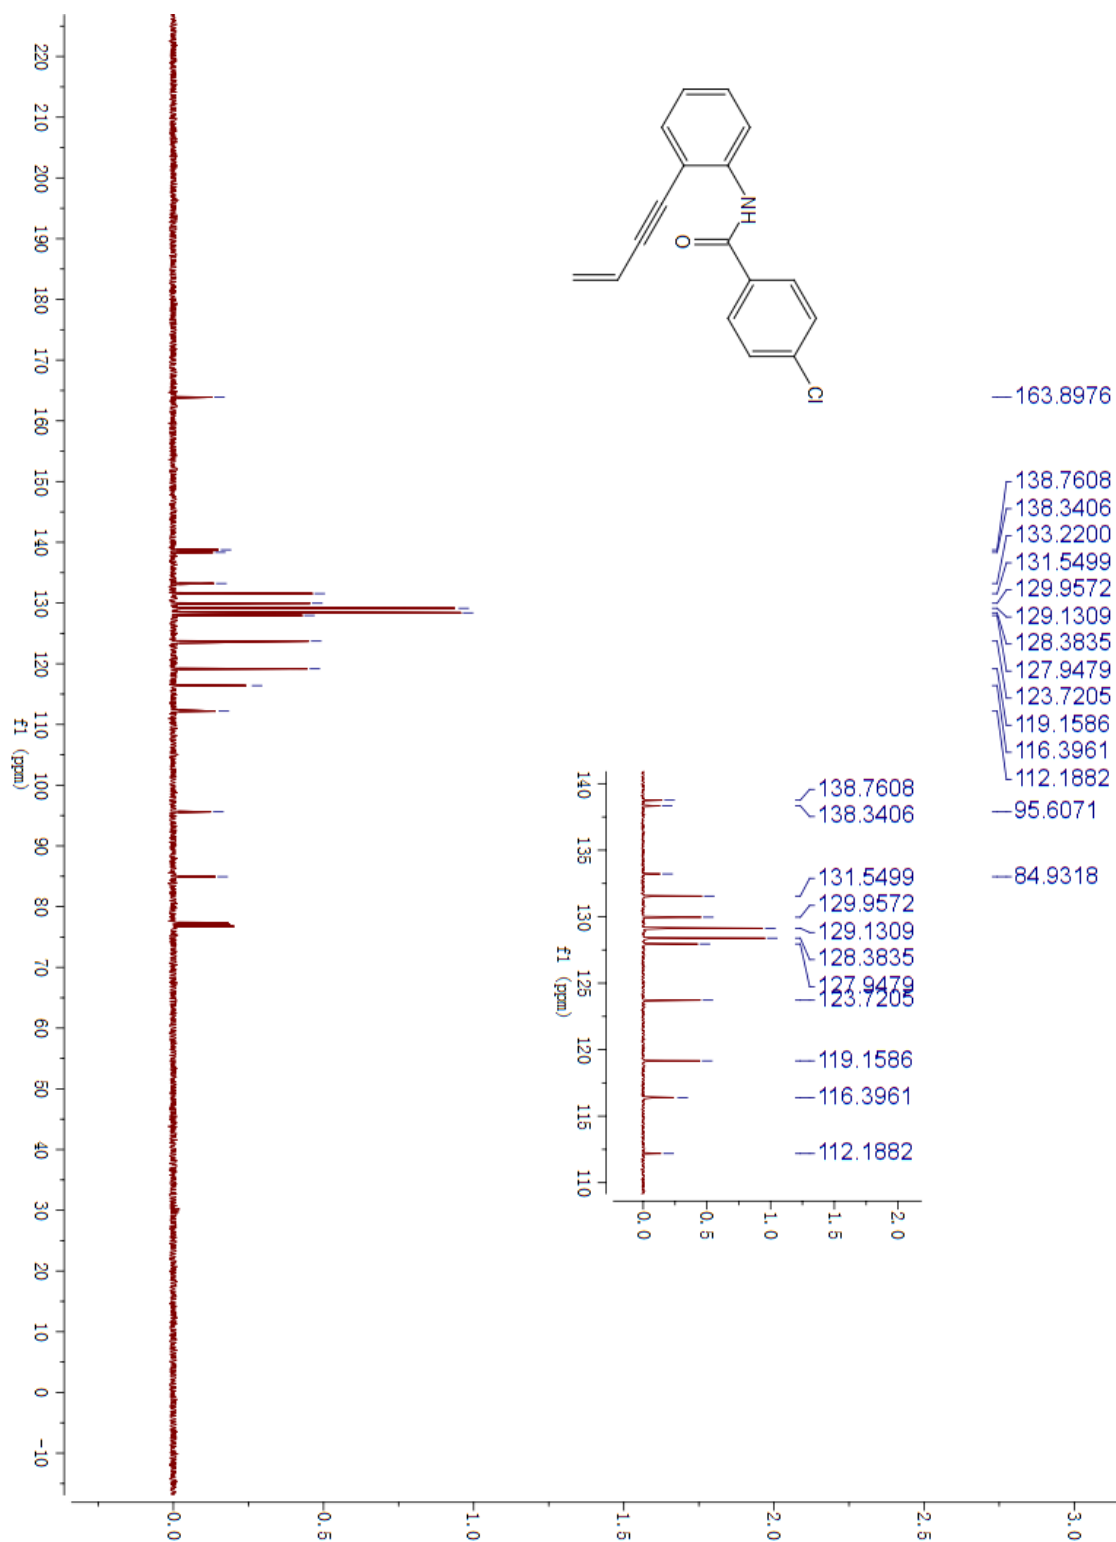

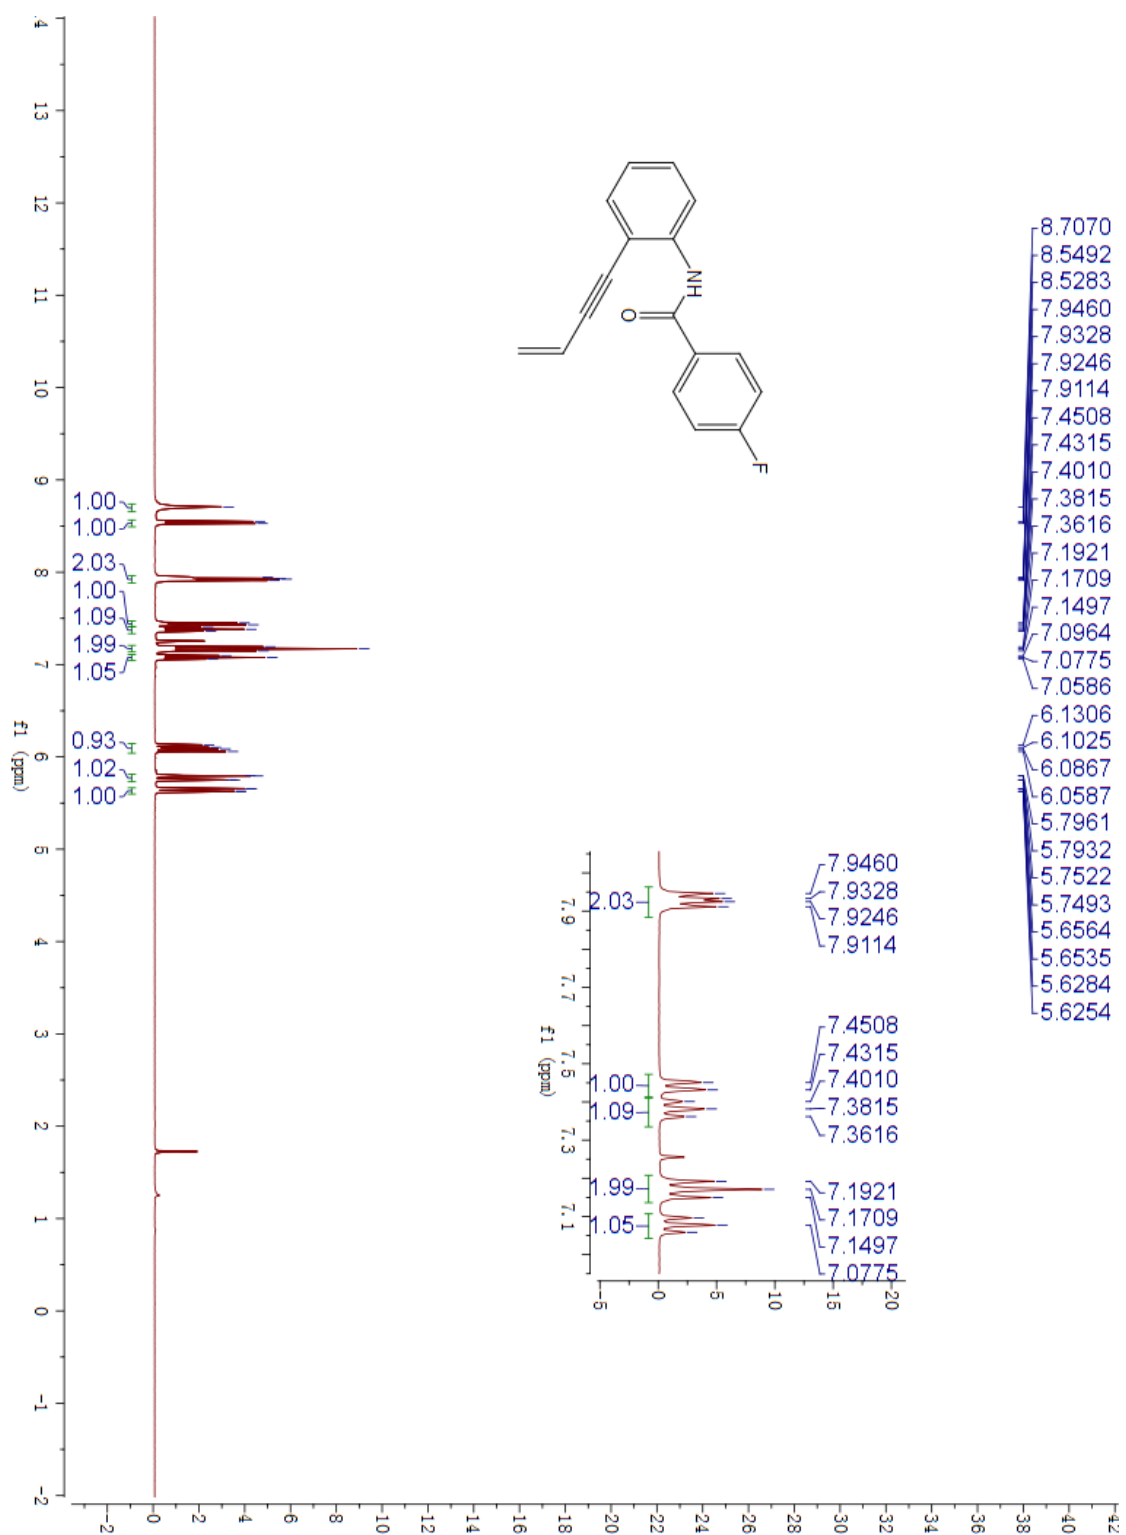

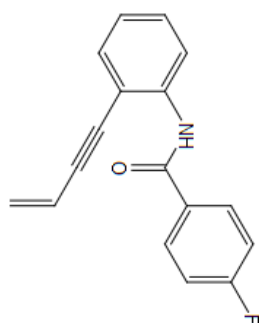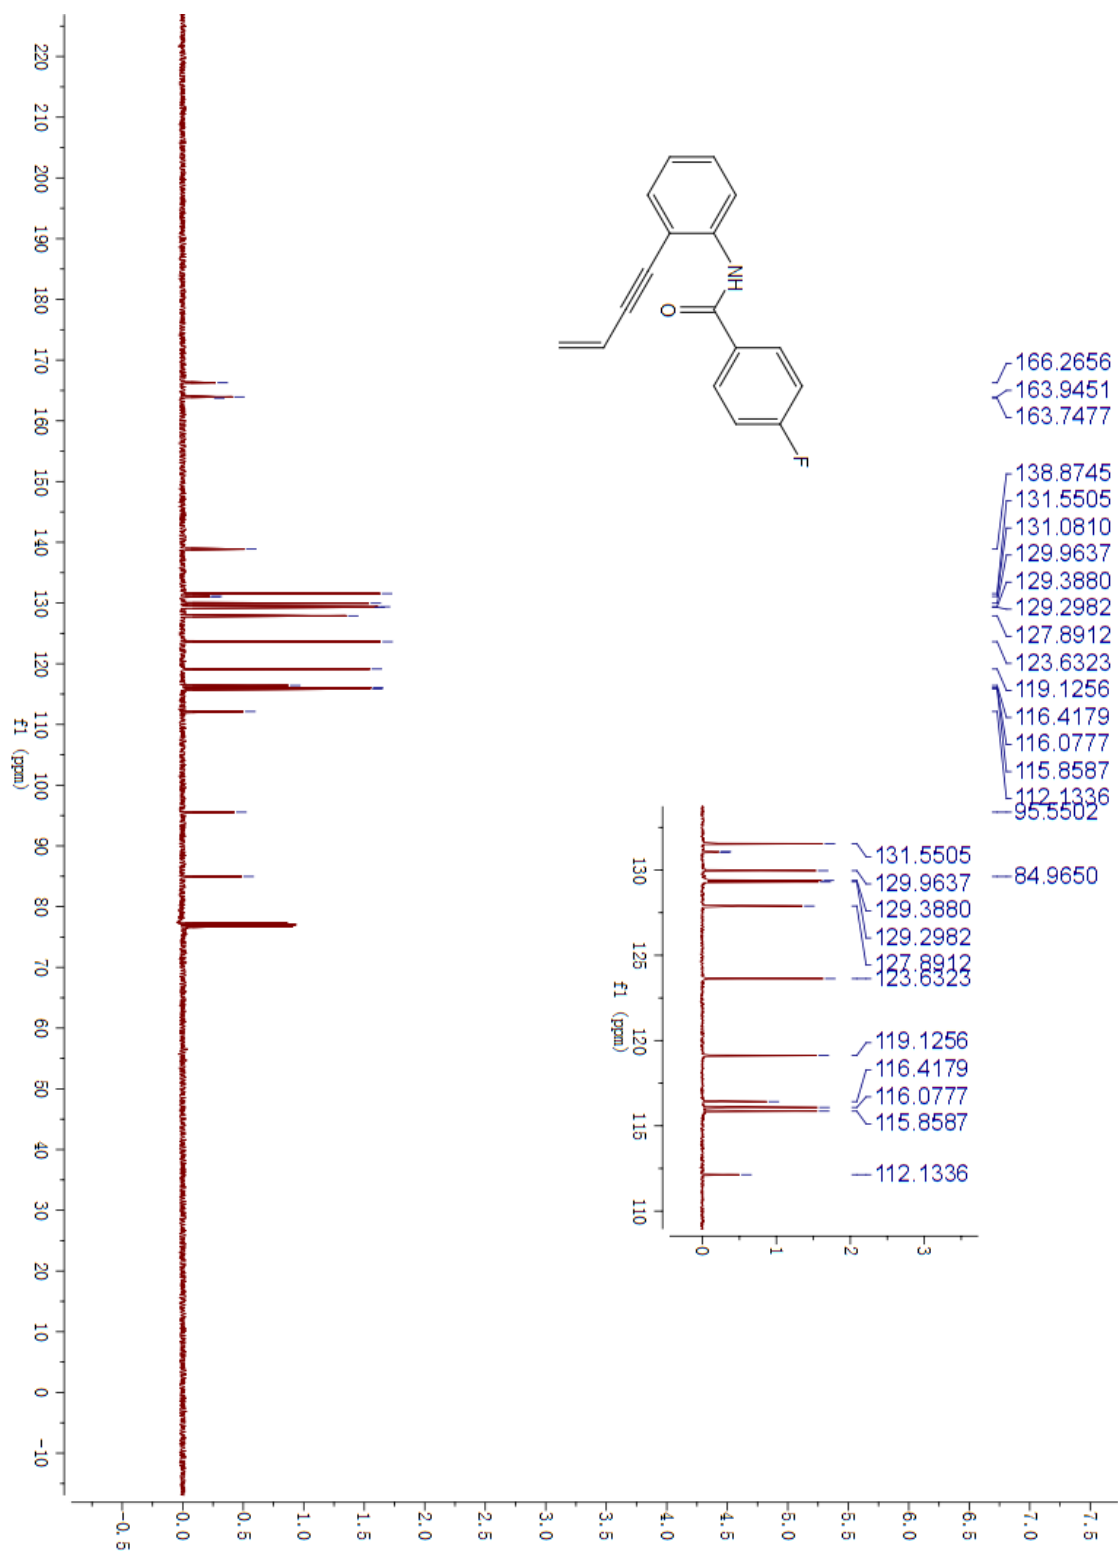

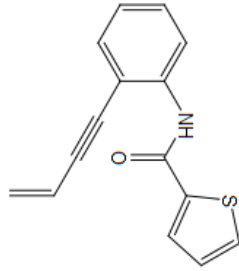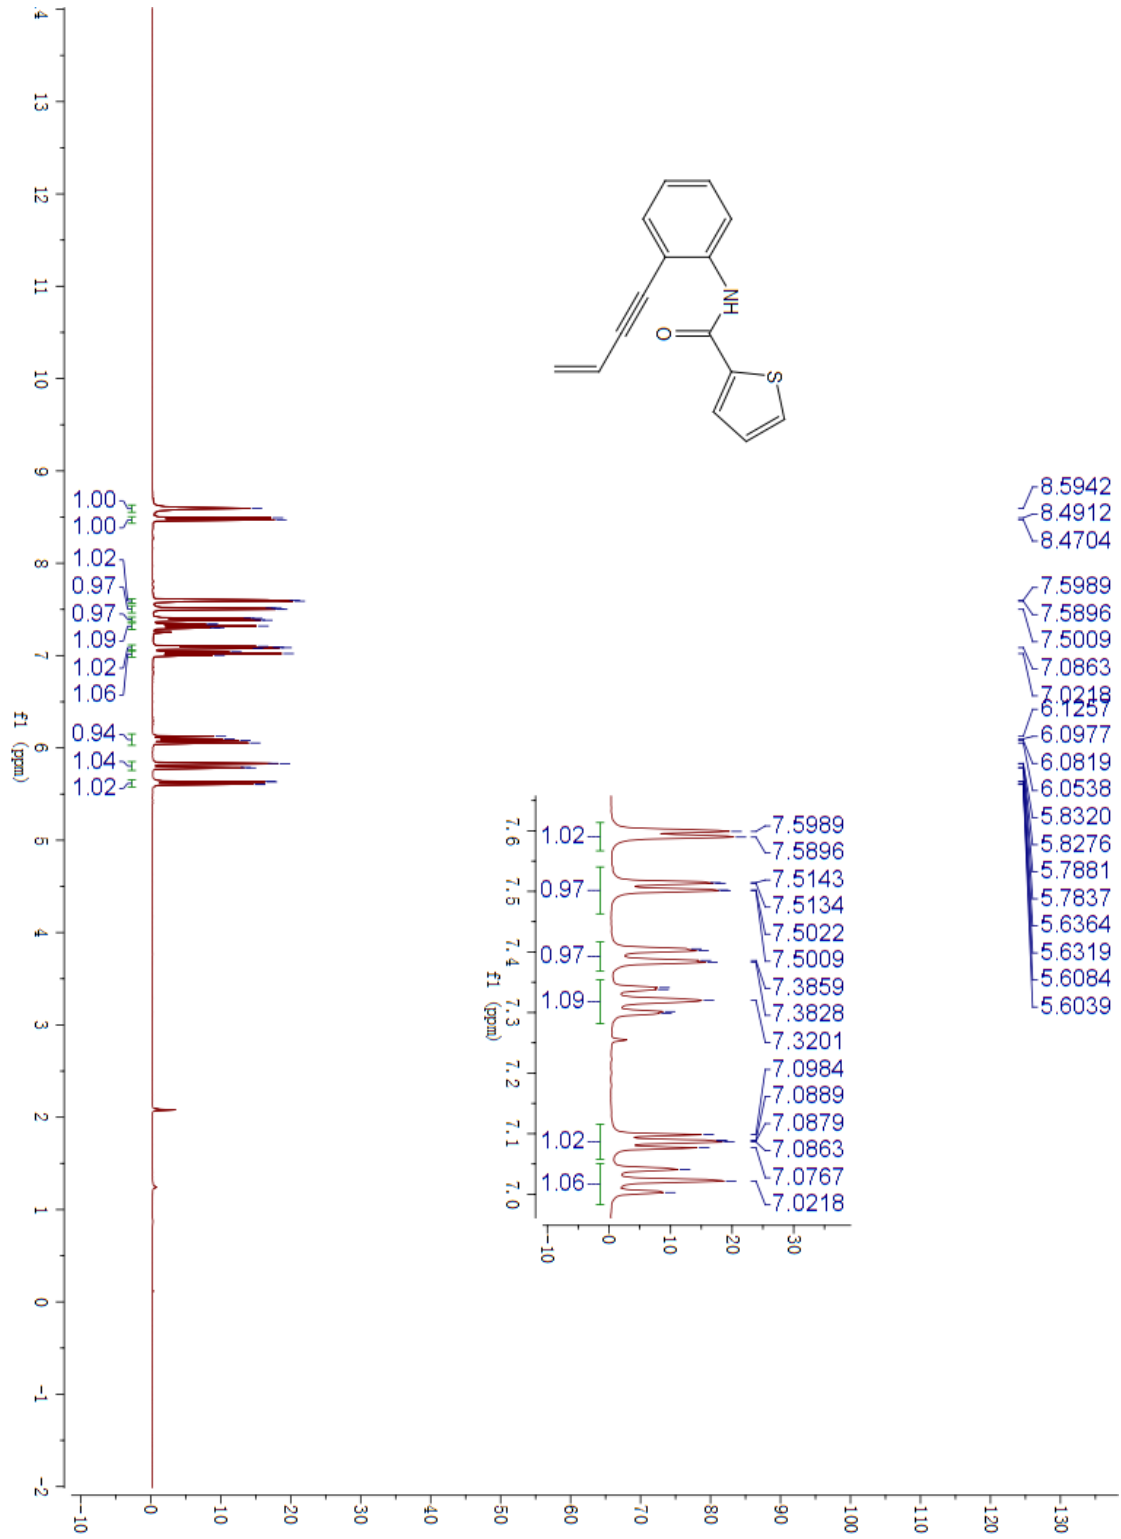

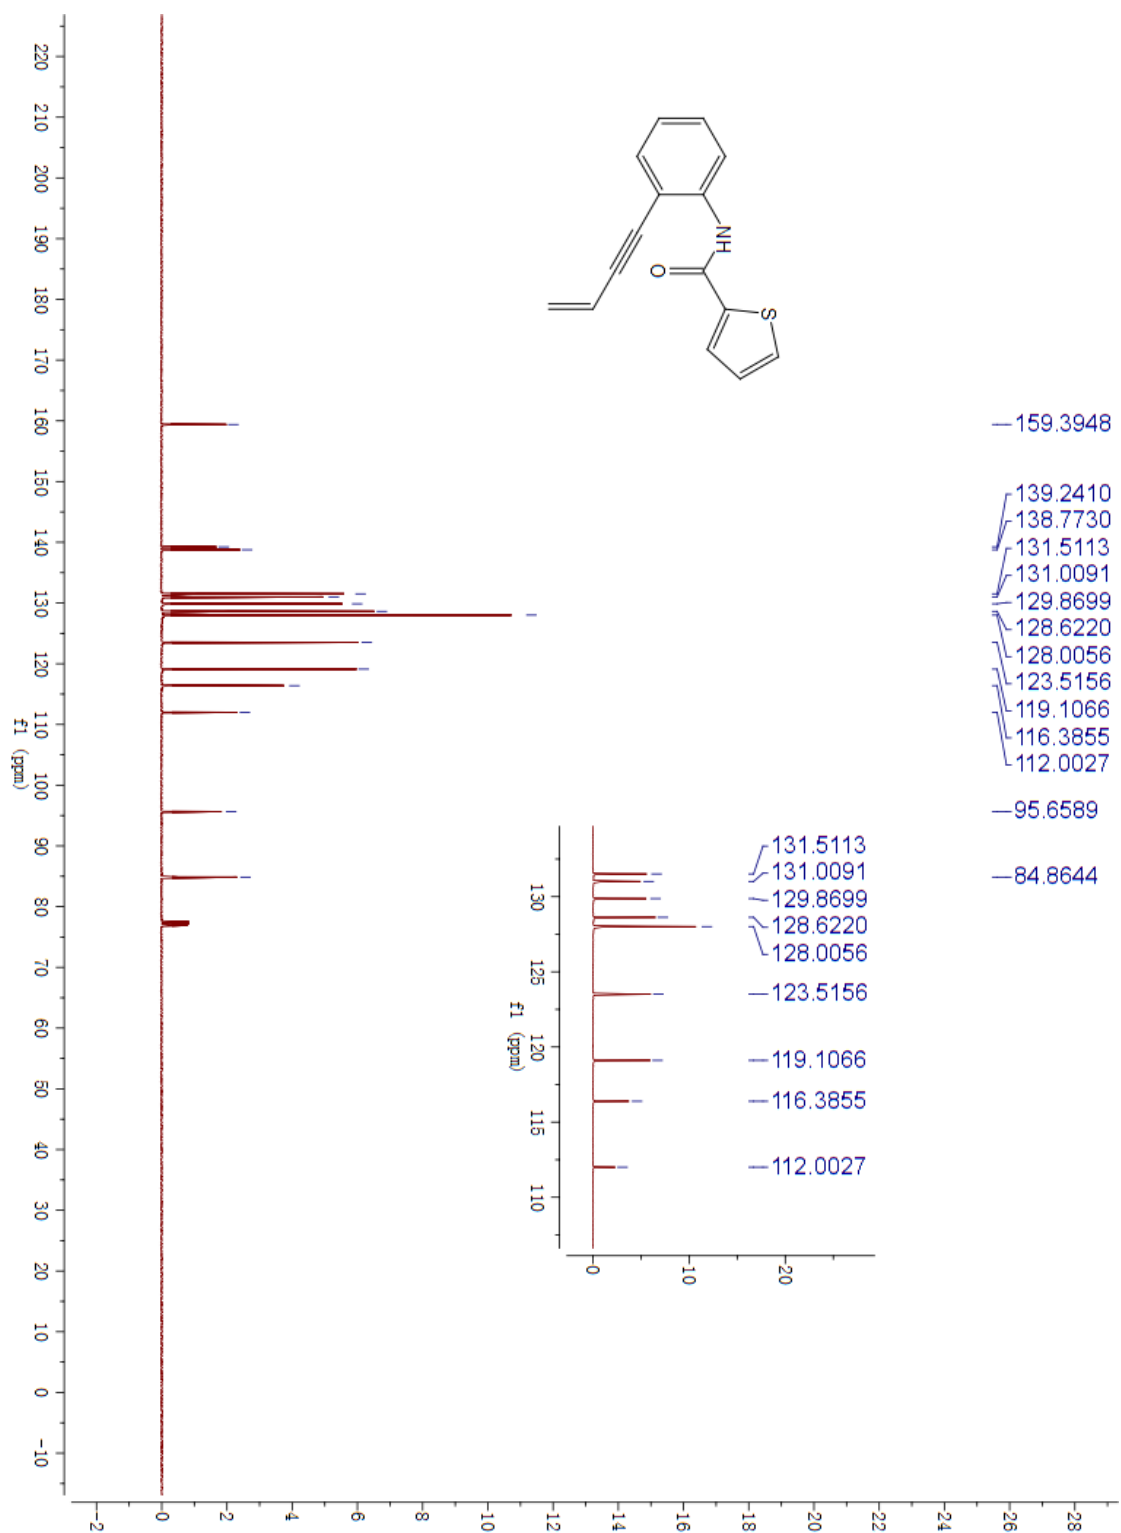

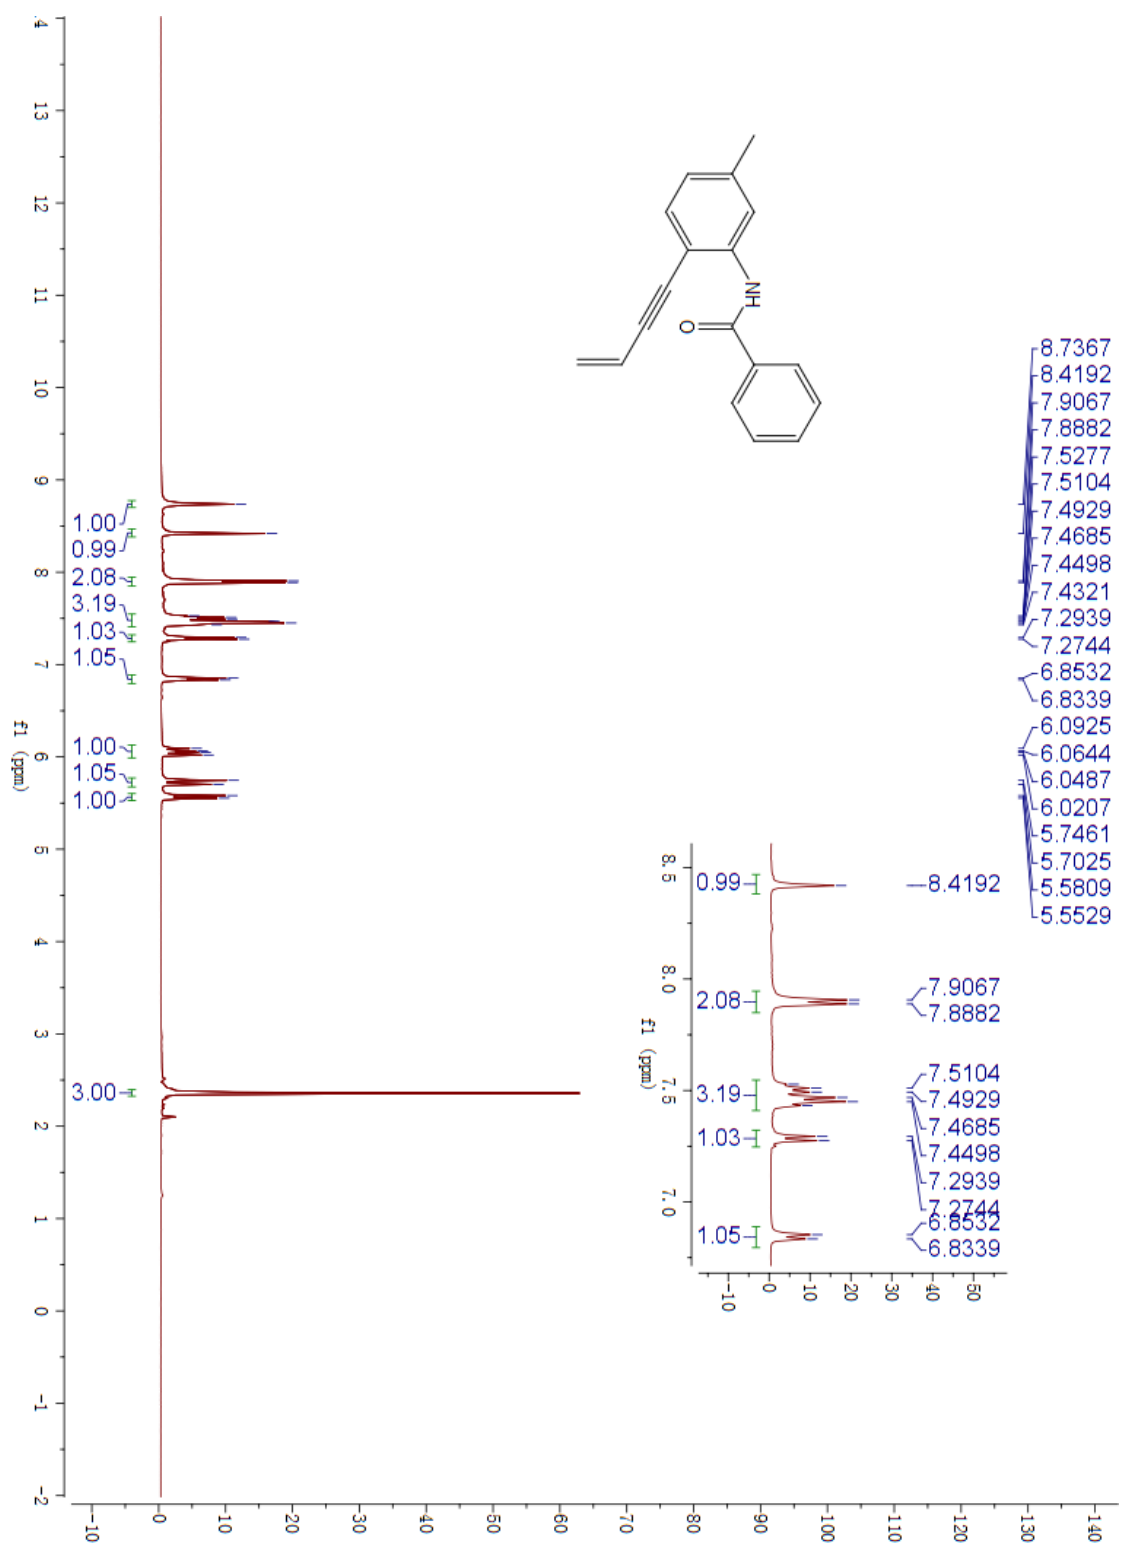

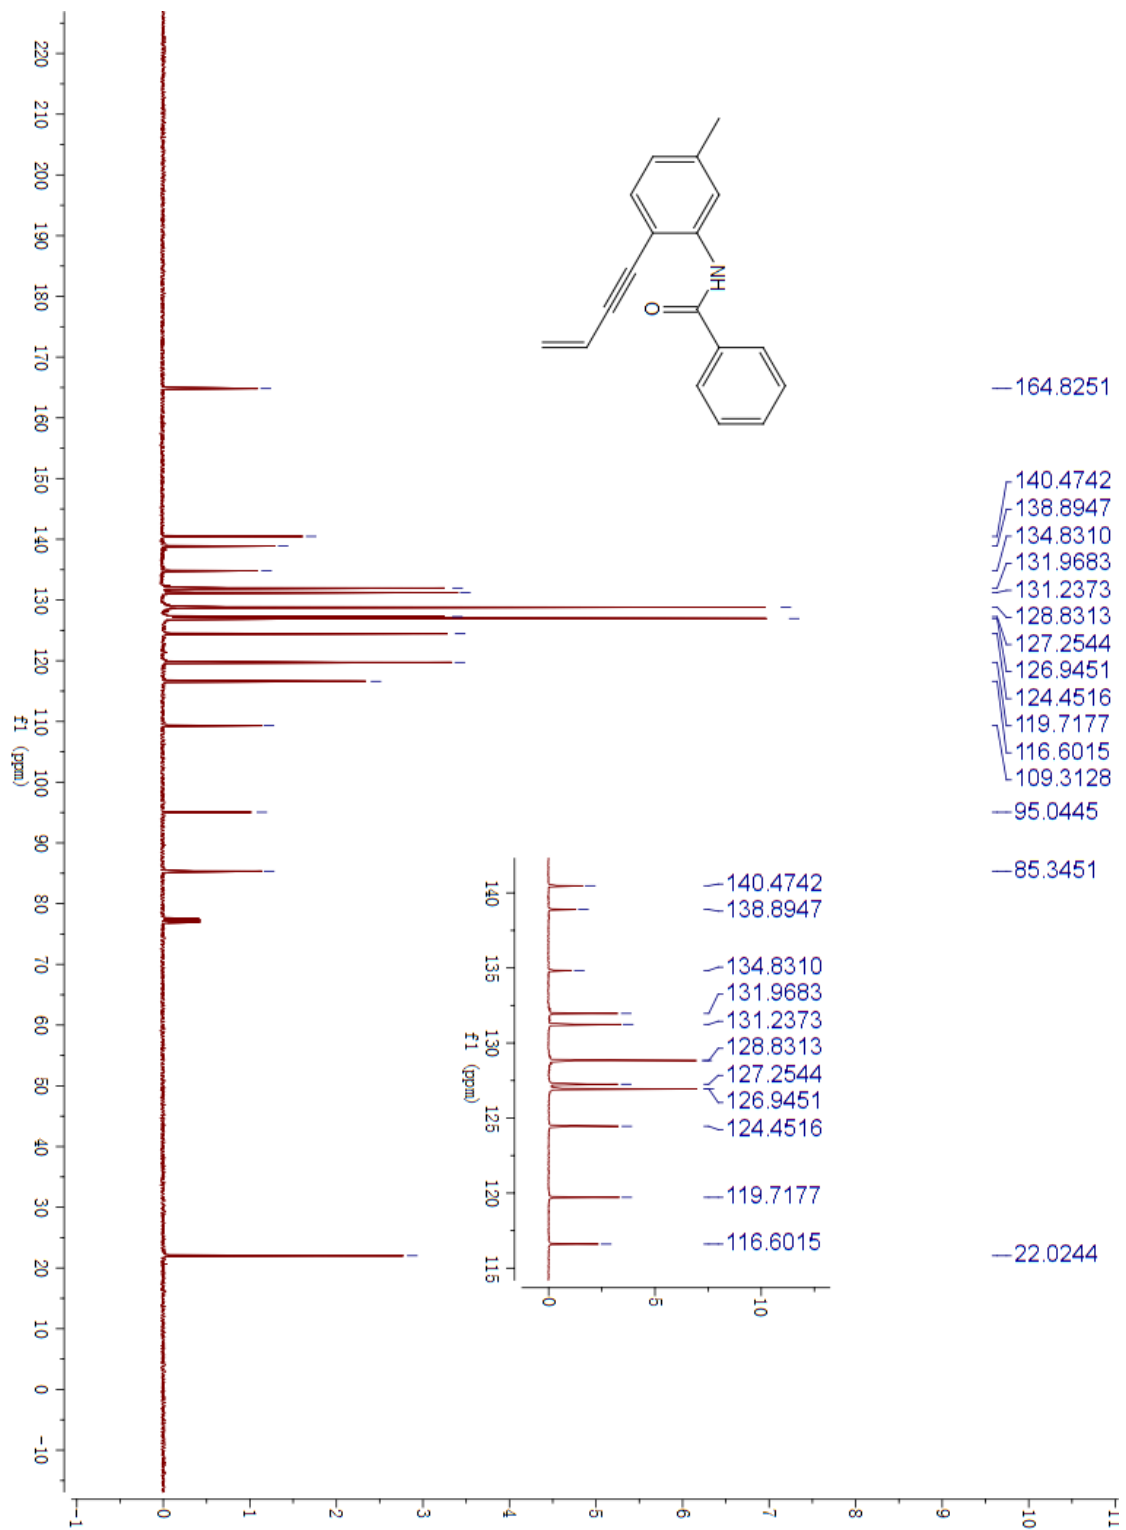

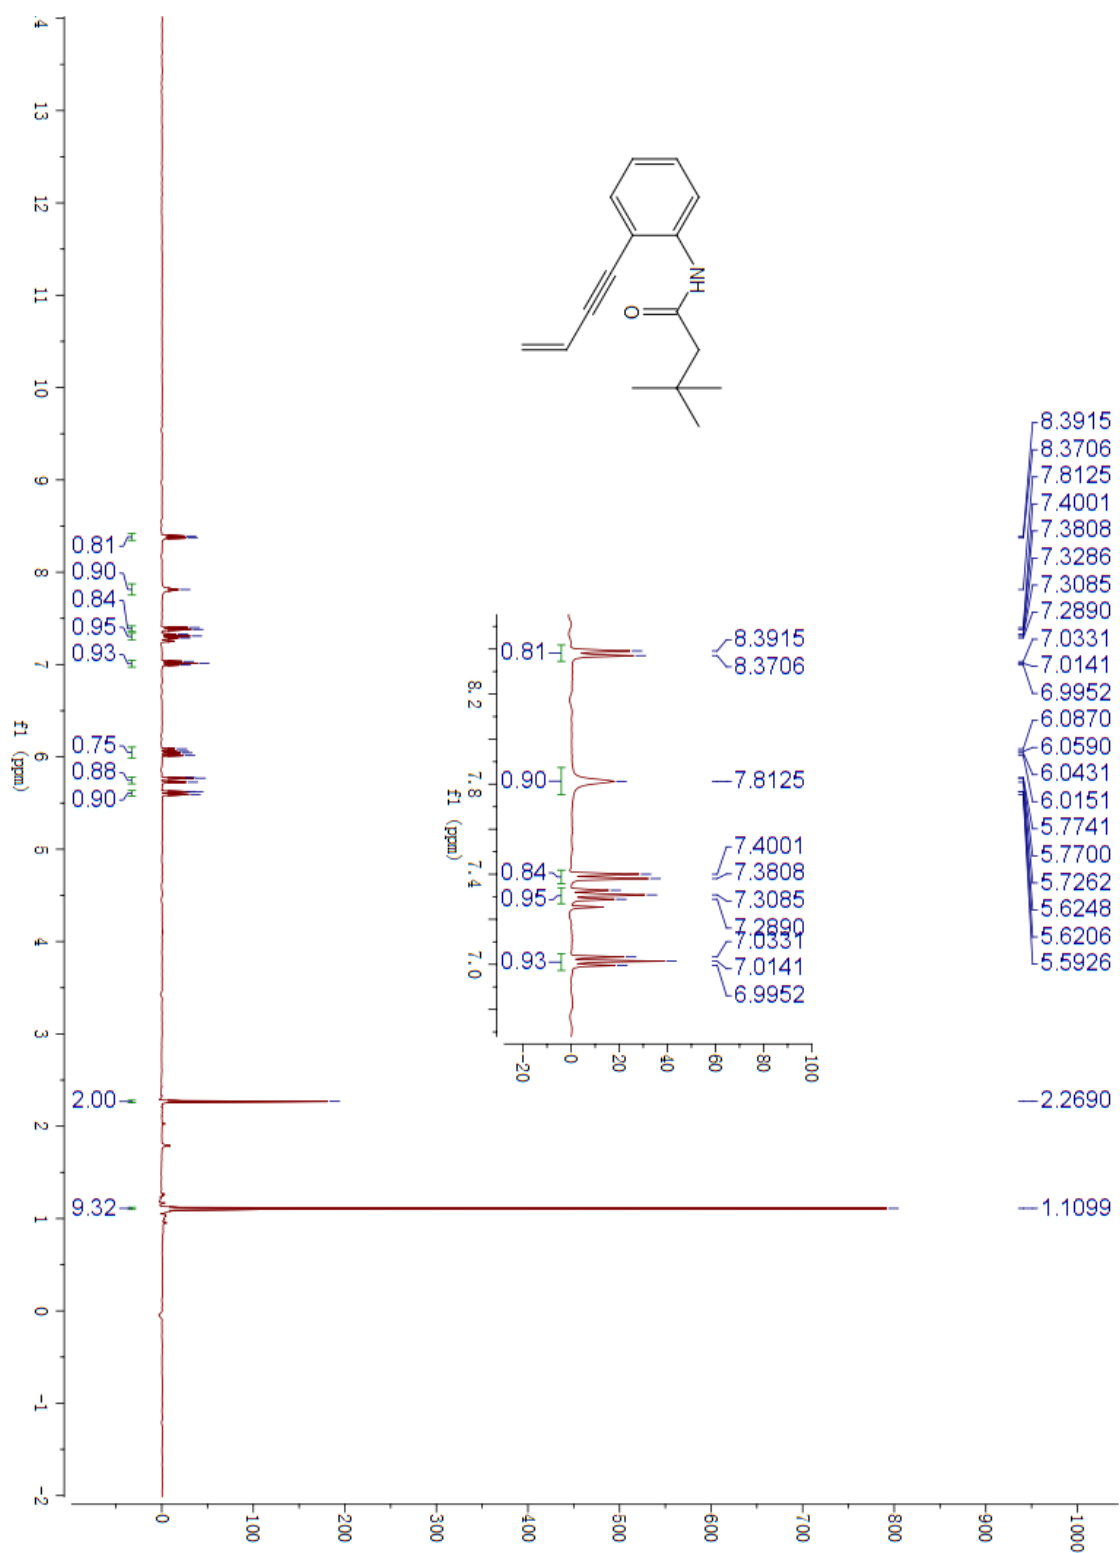

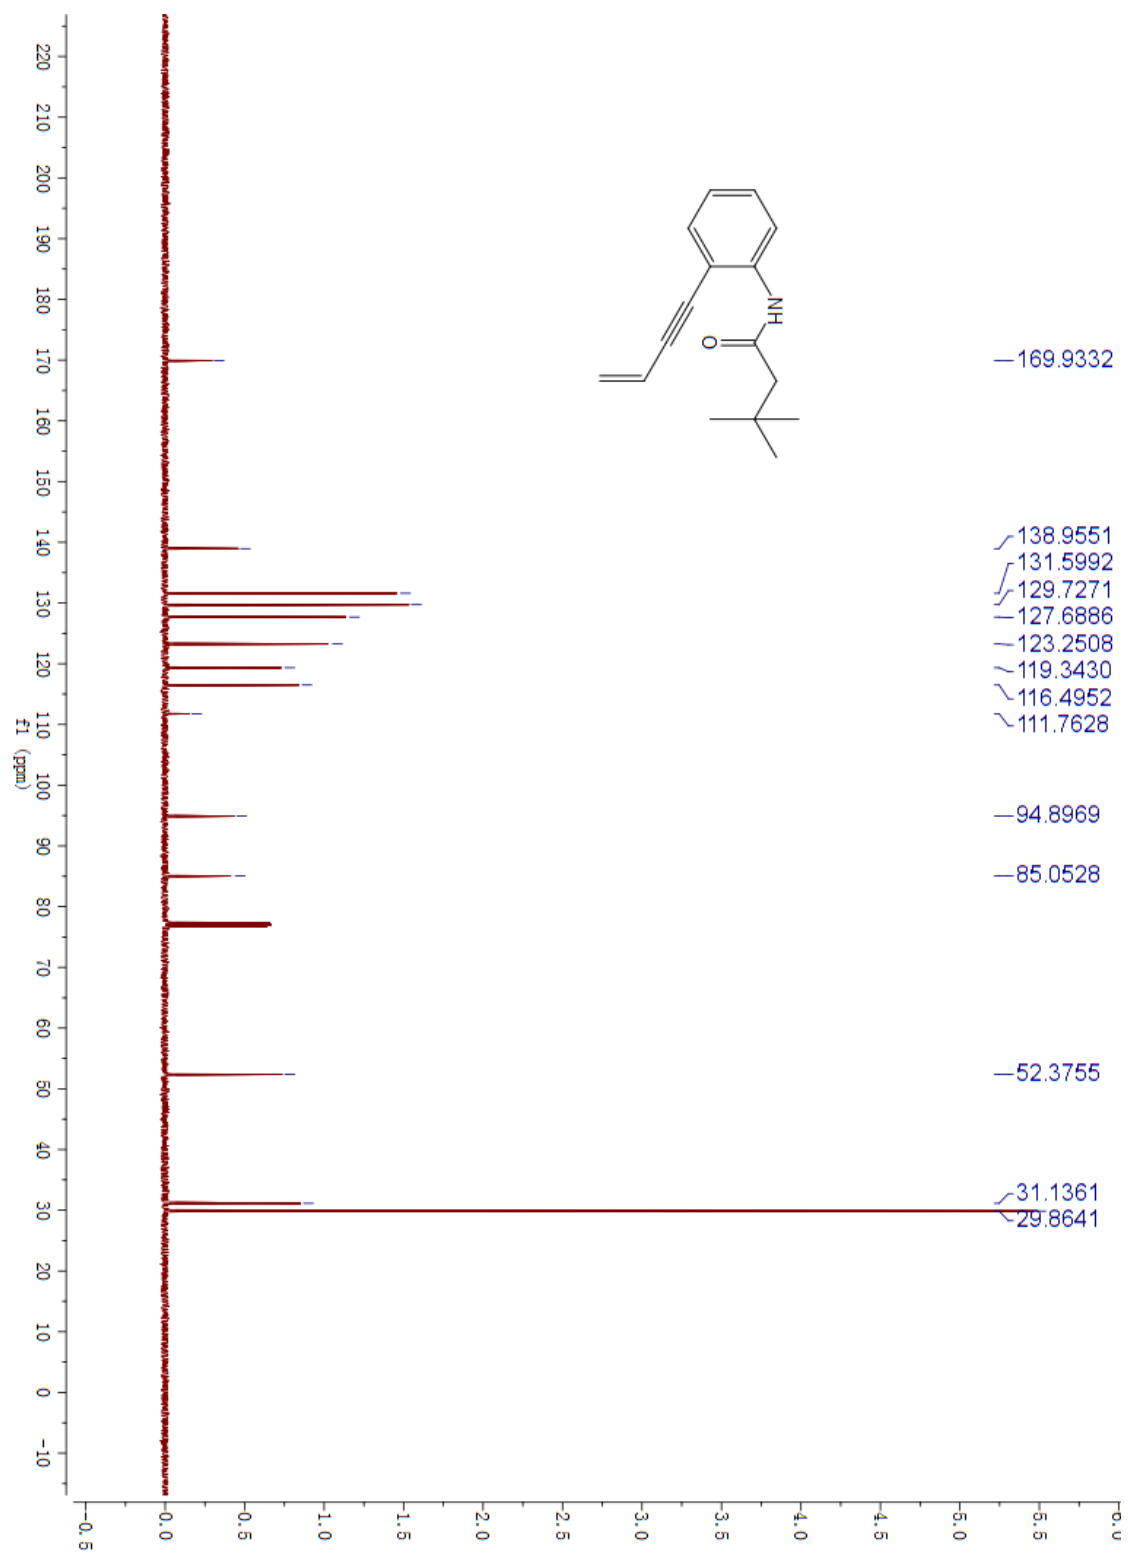

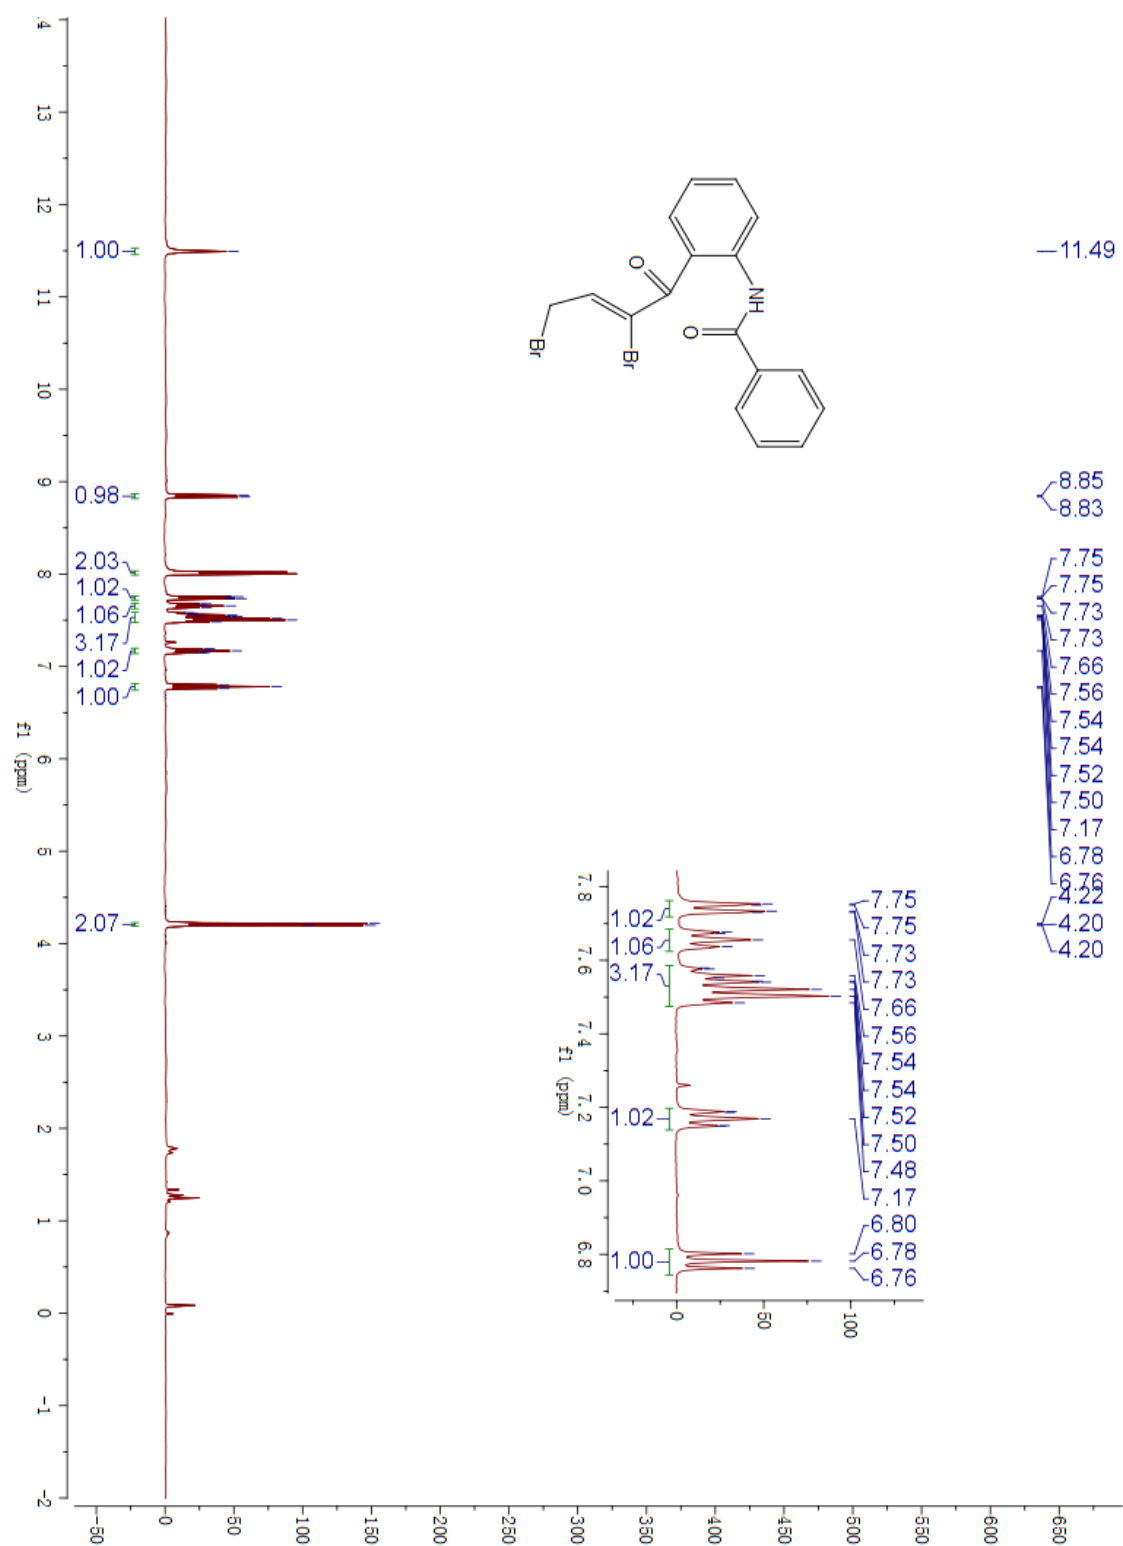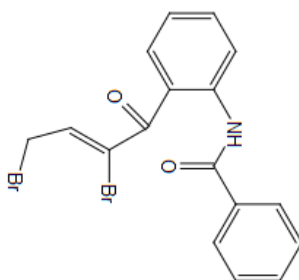

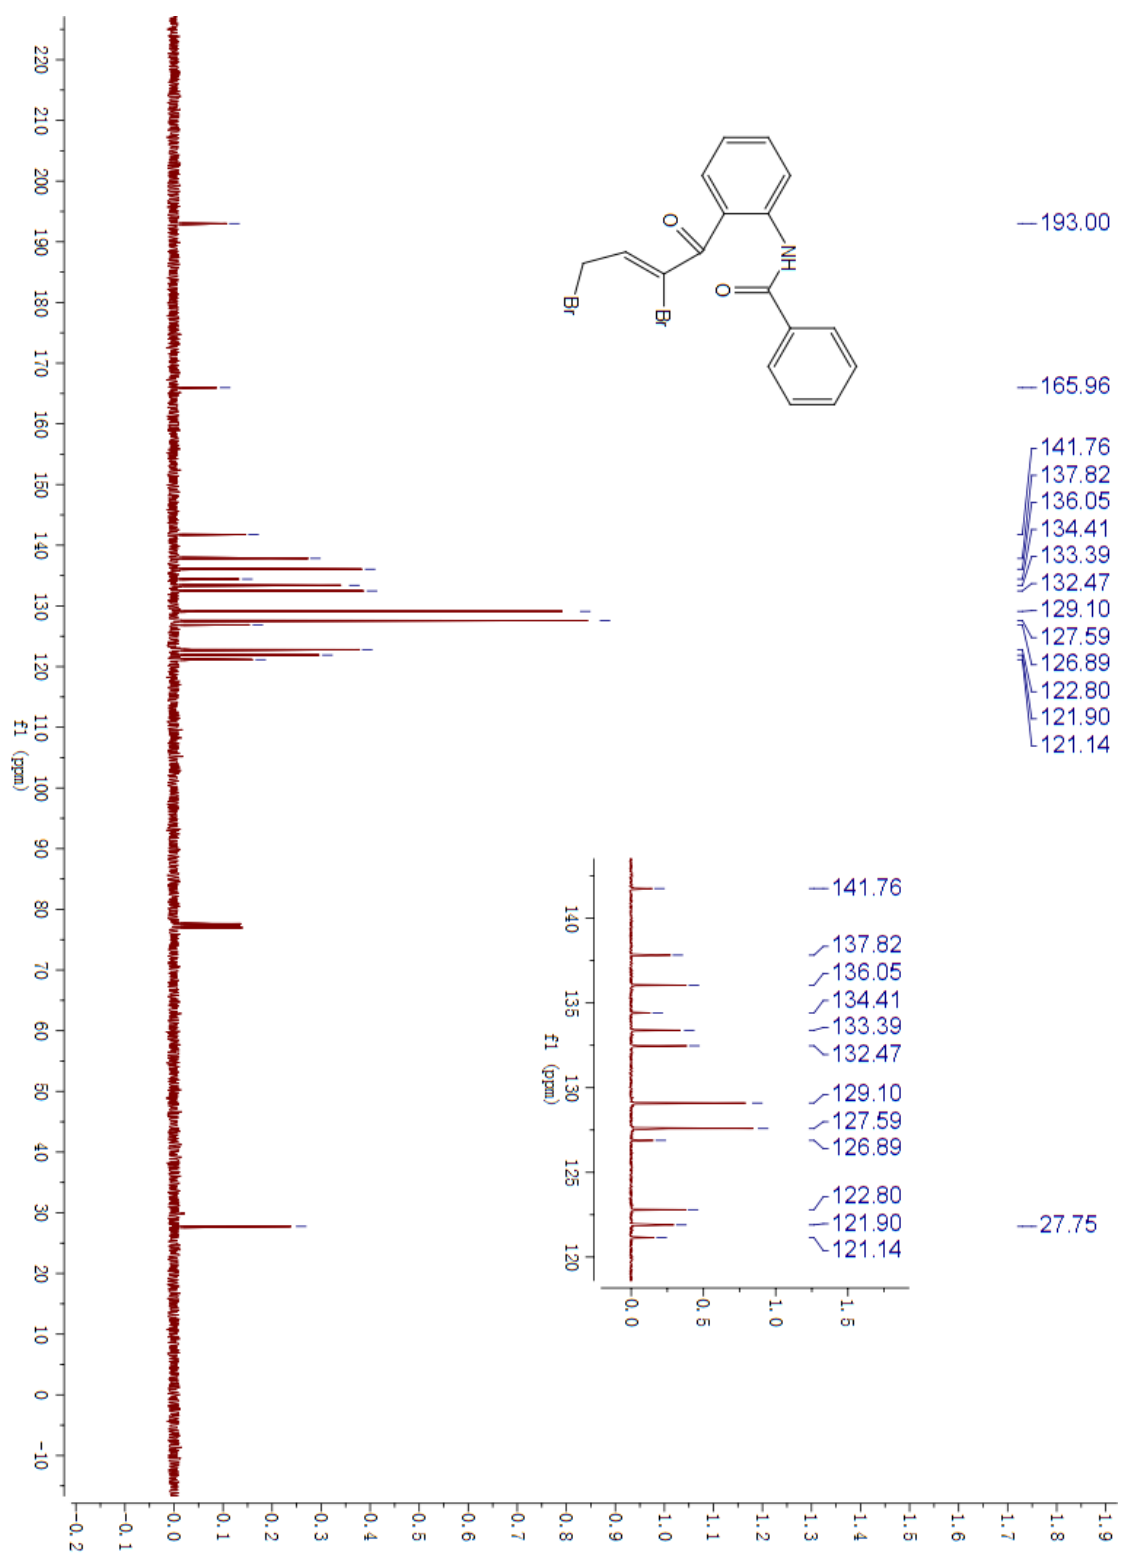

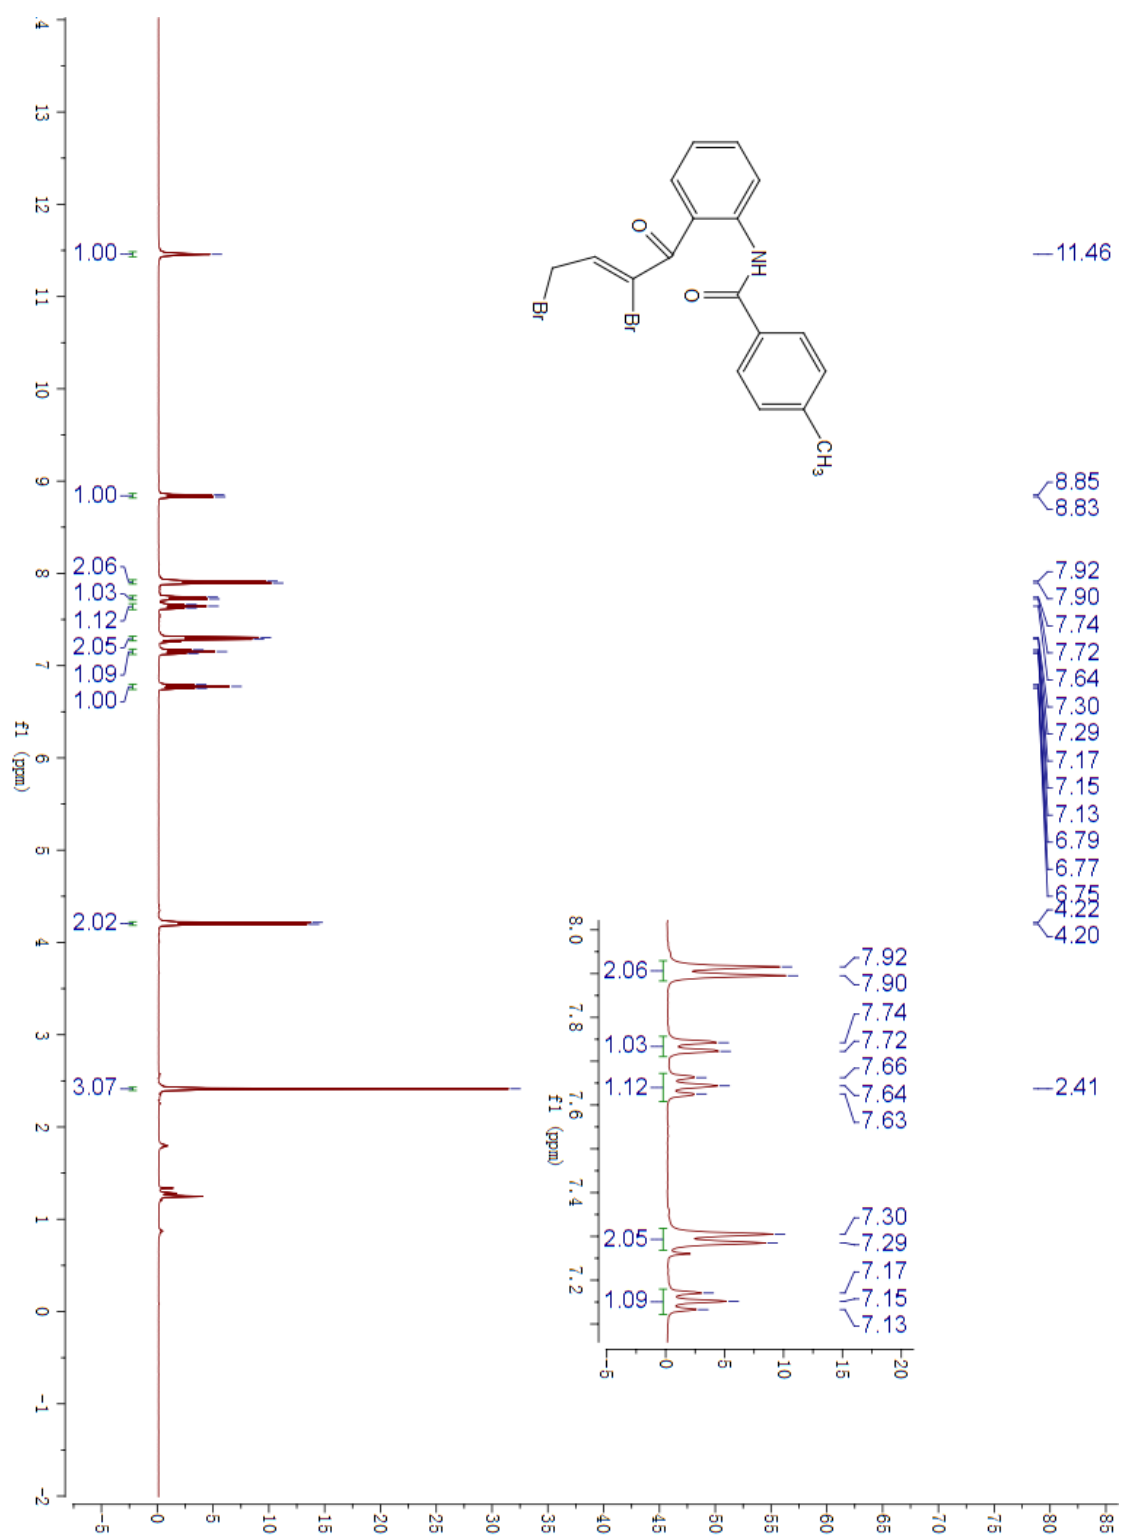

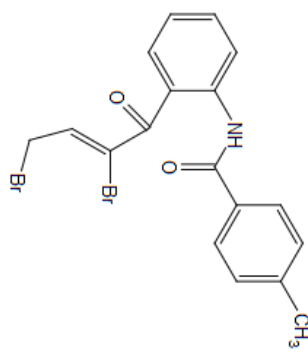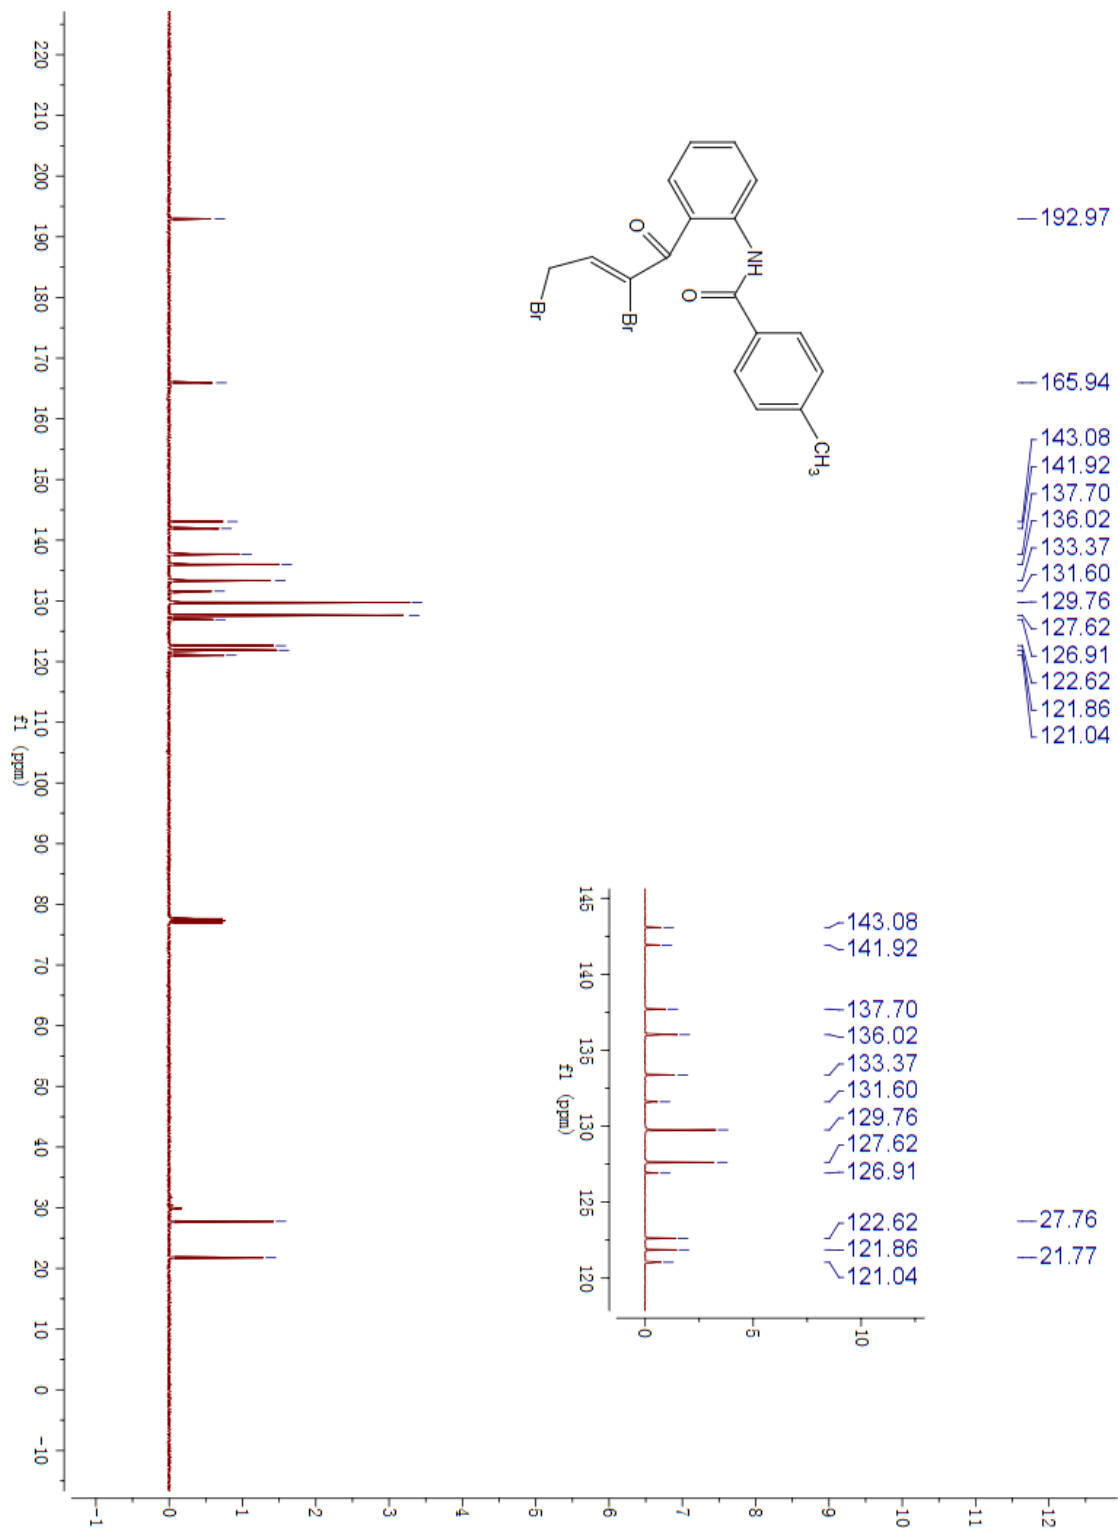

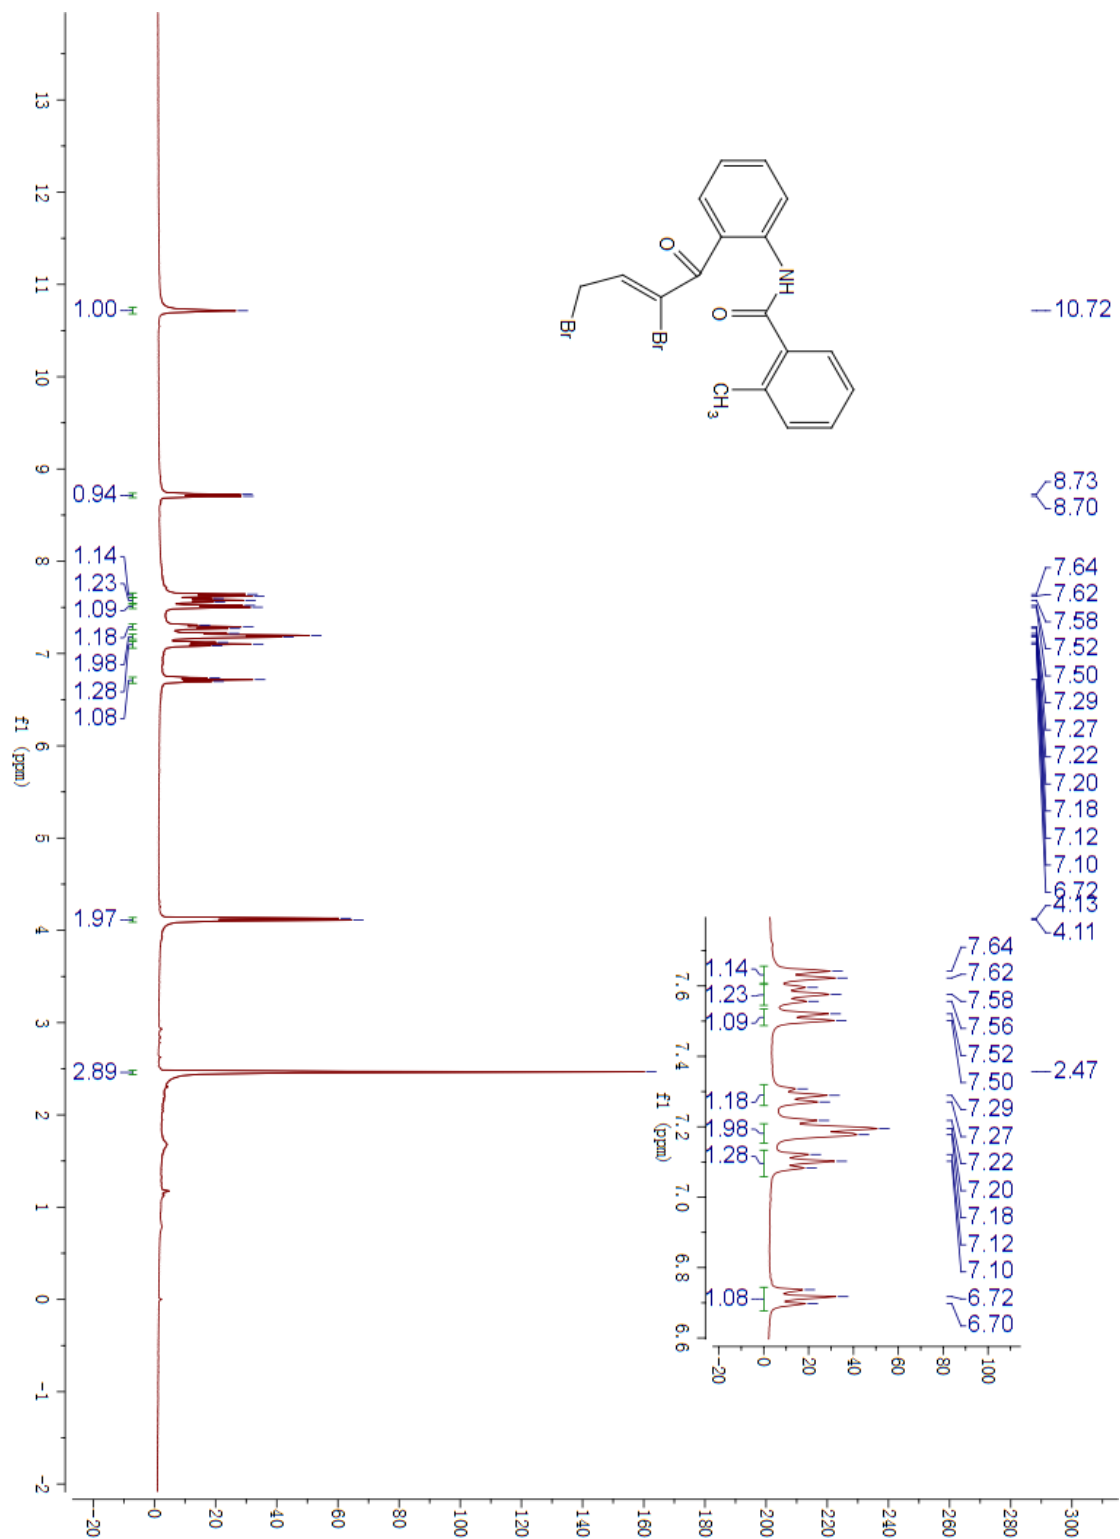

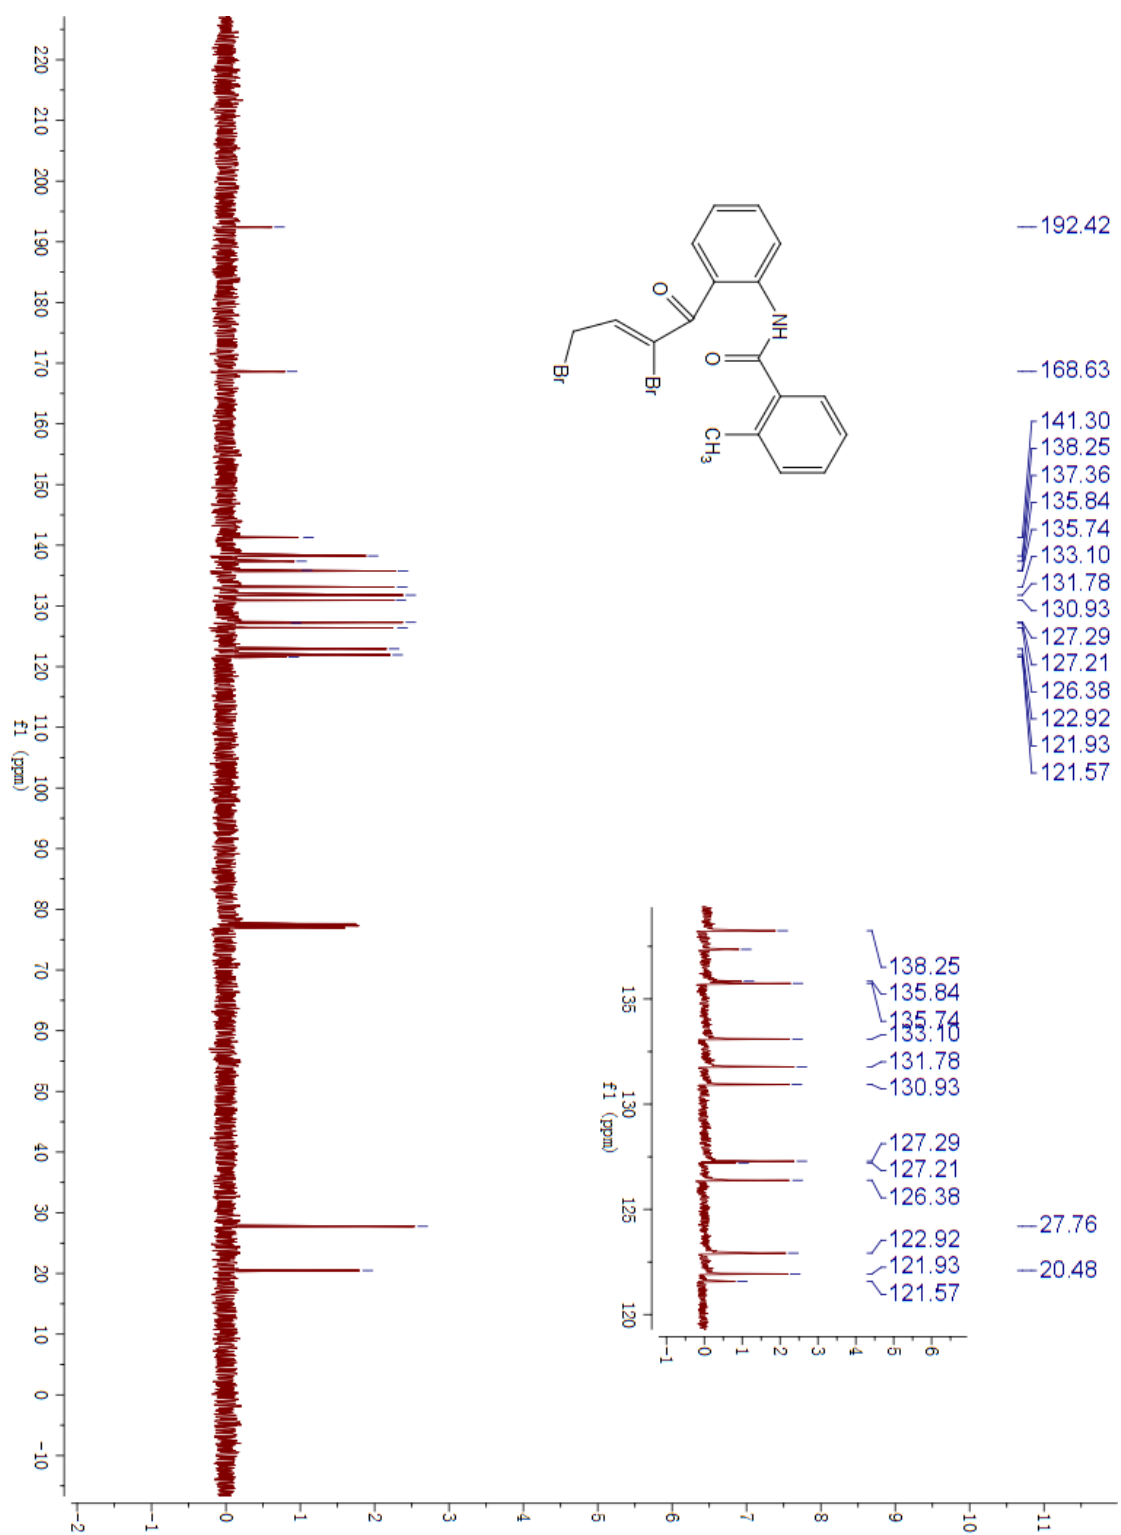

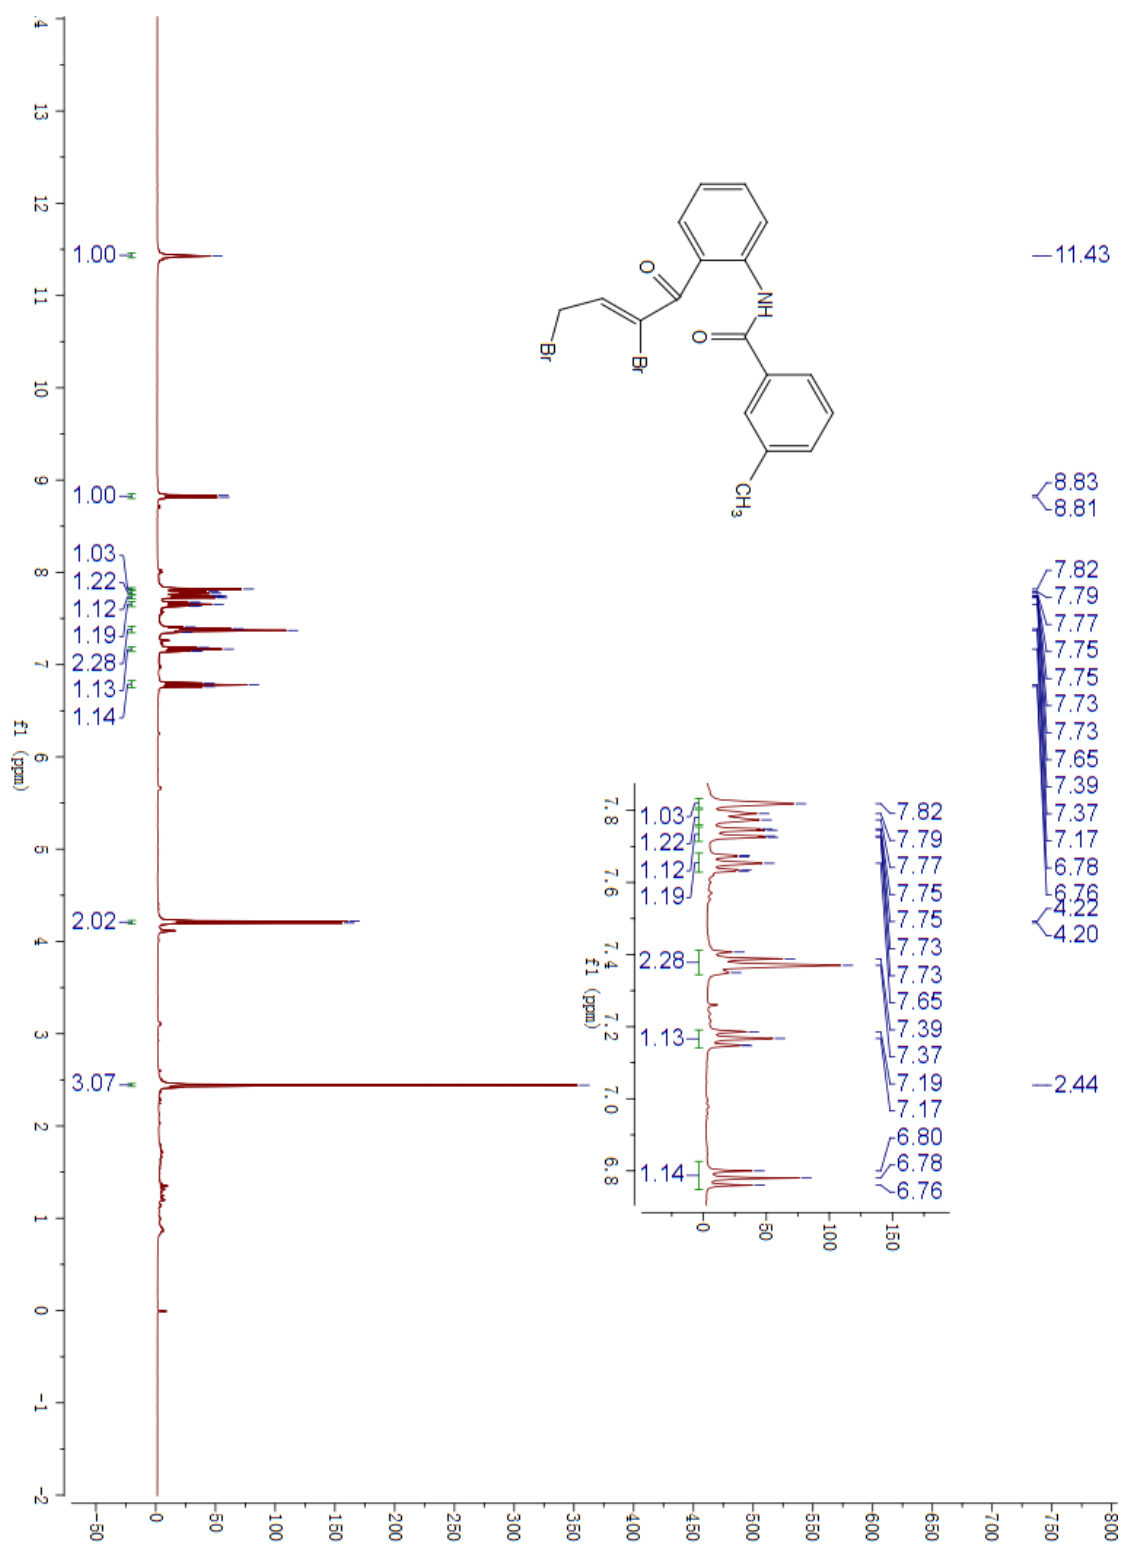

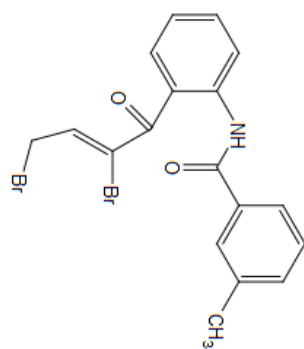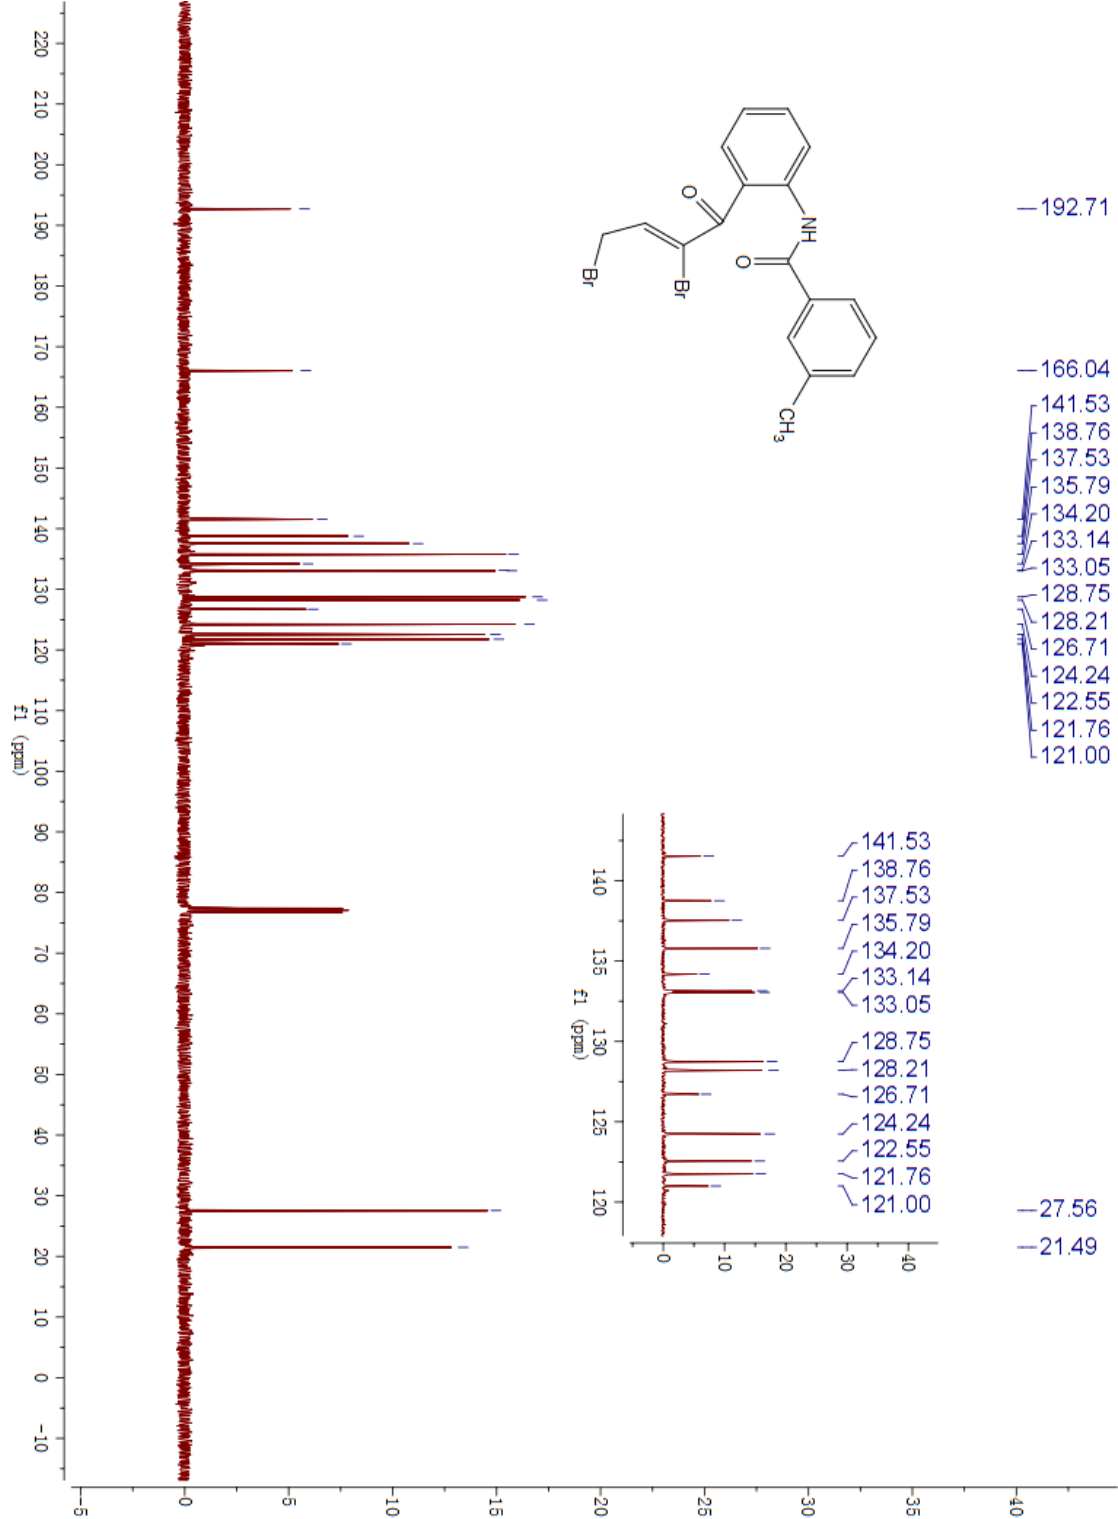

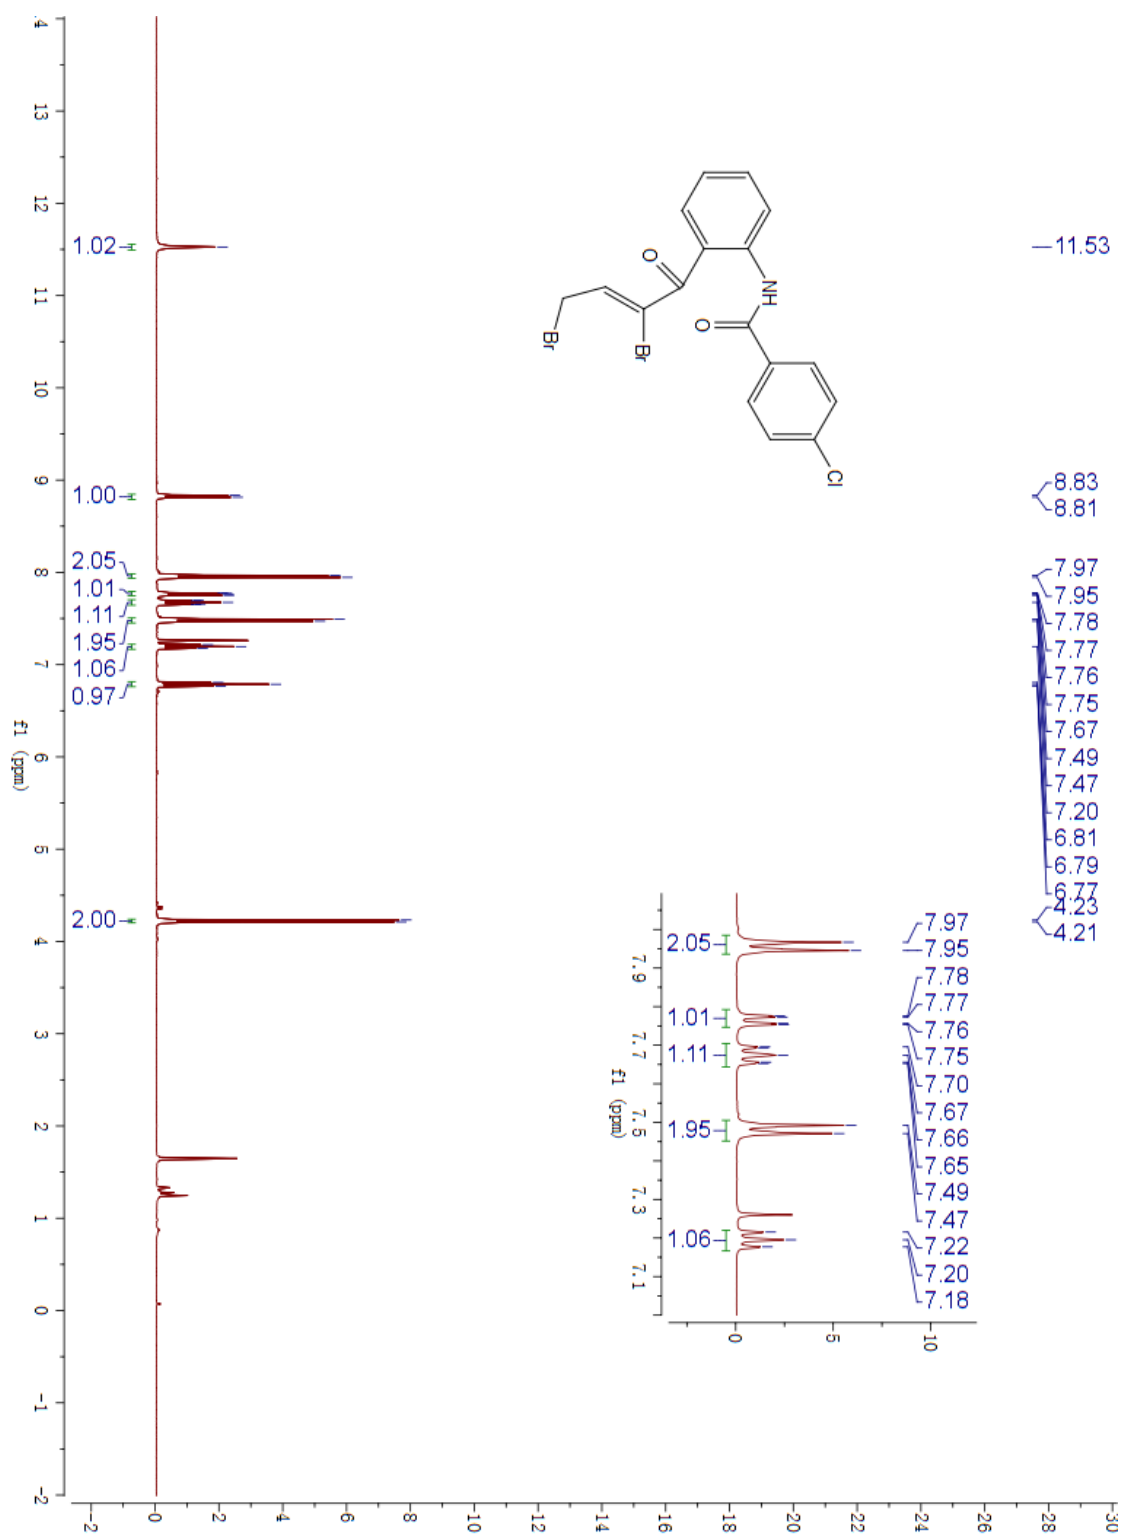

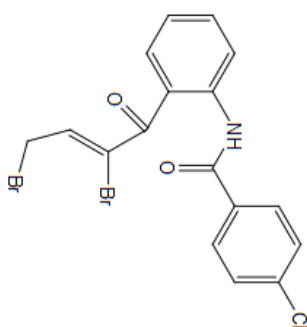

— 193.24

— 164.94

141.70

138.90

137.90

136.23

133.55

132.89

129.43

129.10

126.78

123.06

121.93

121.12

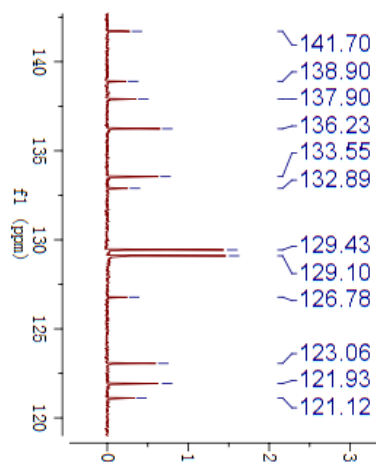

— 27.71

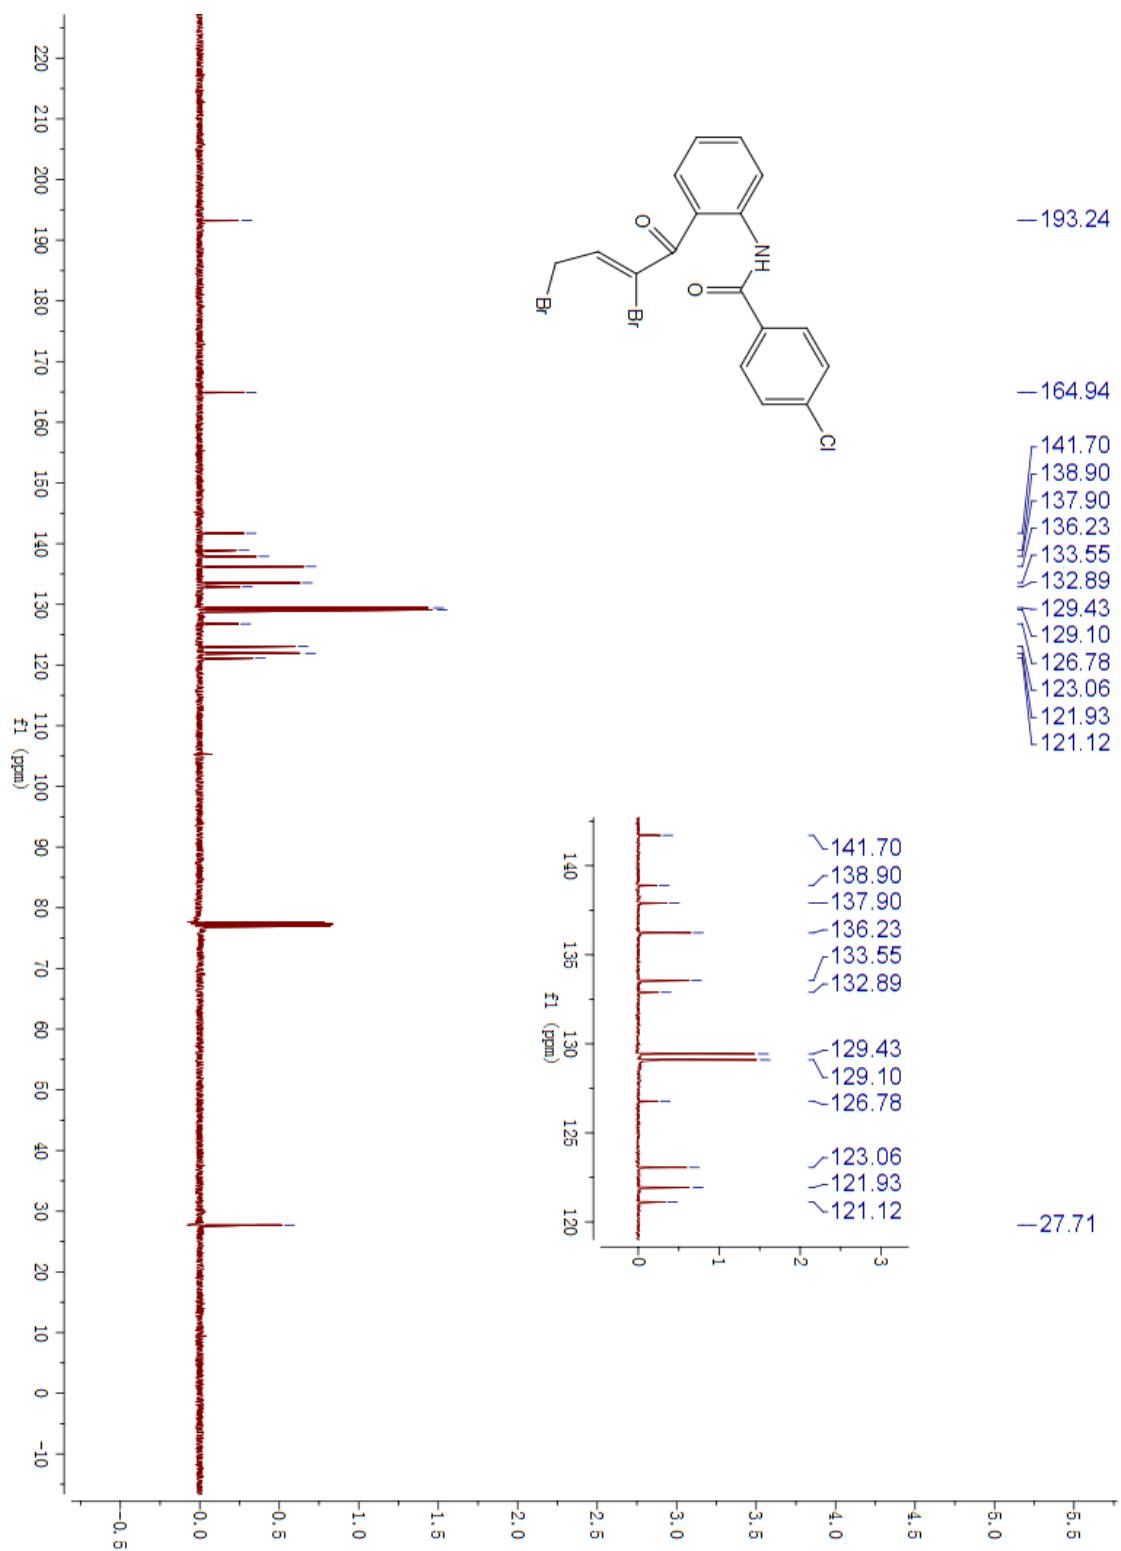

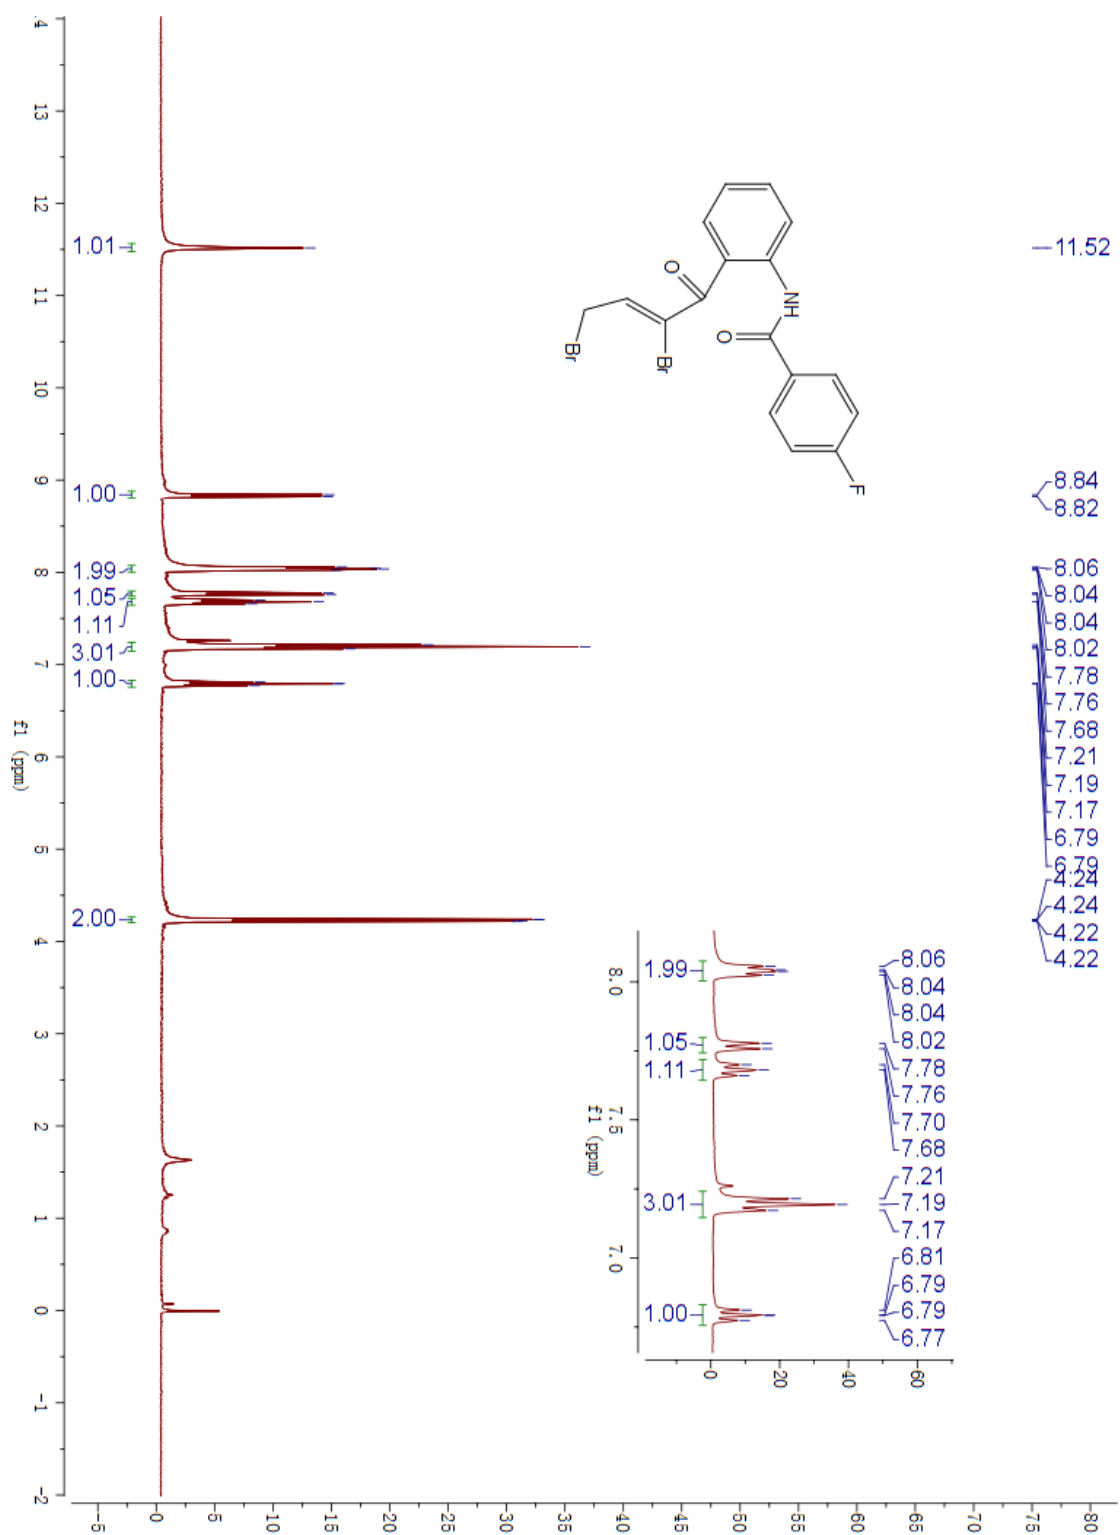

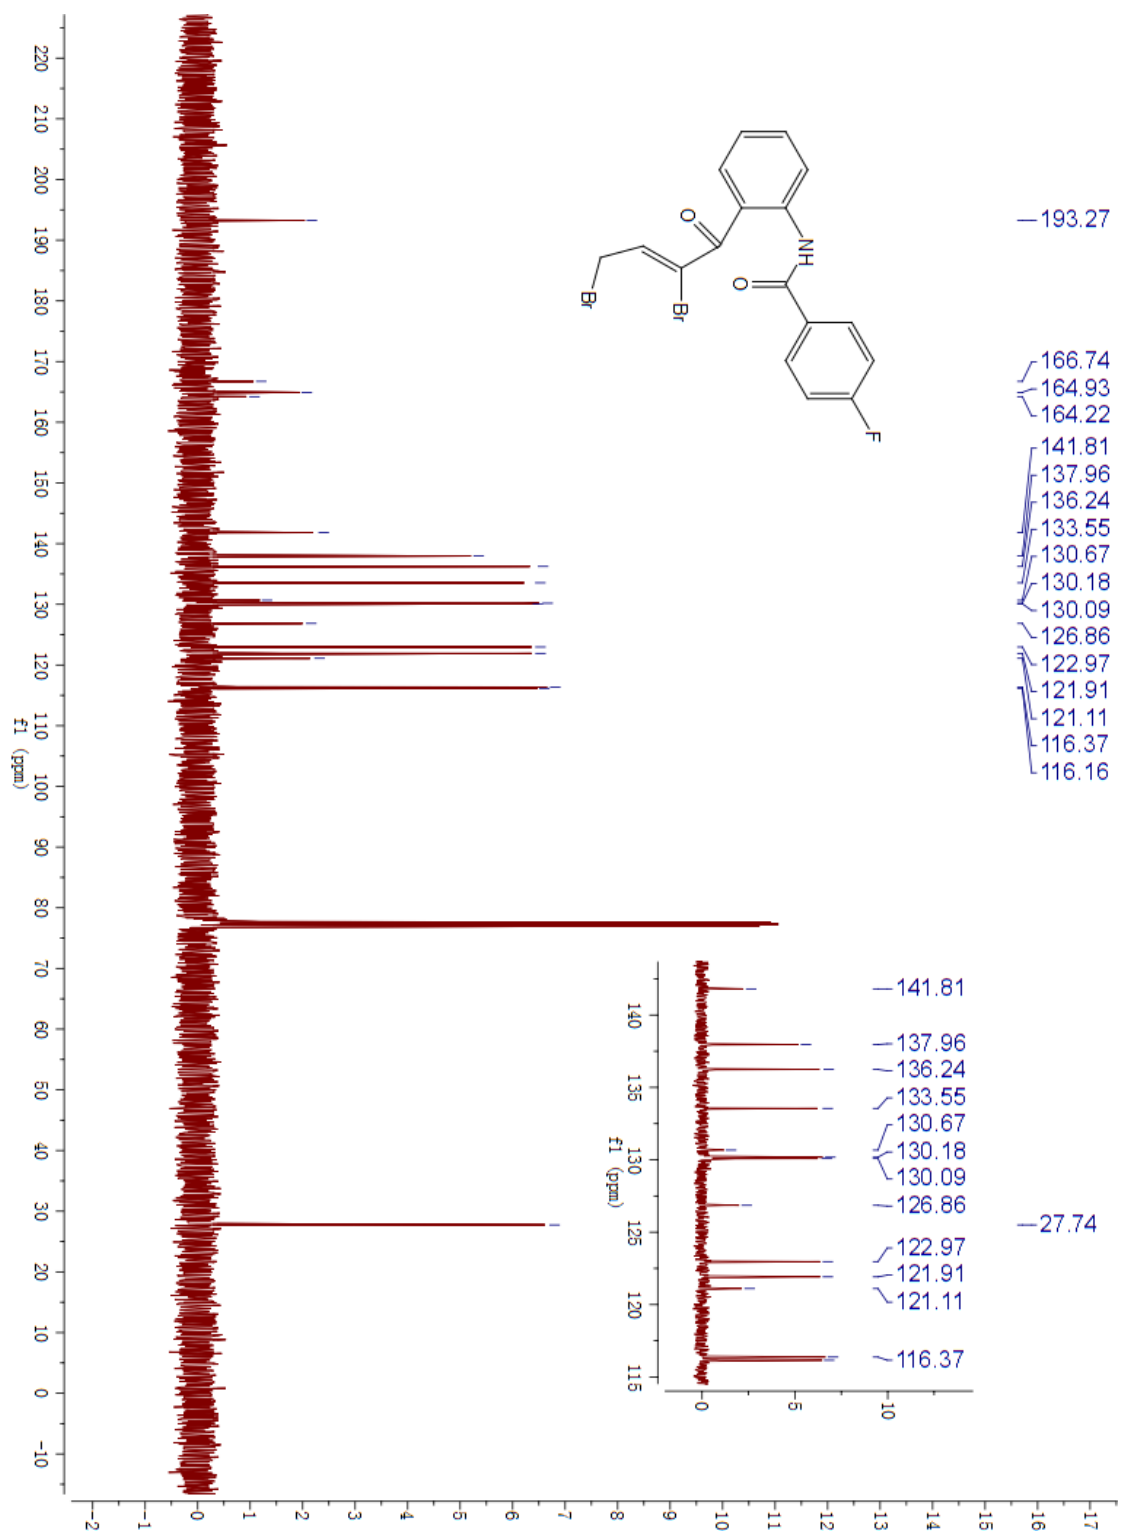

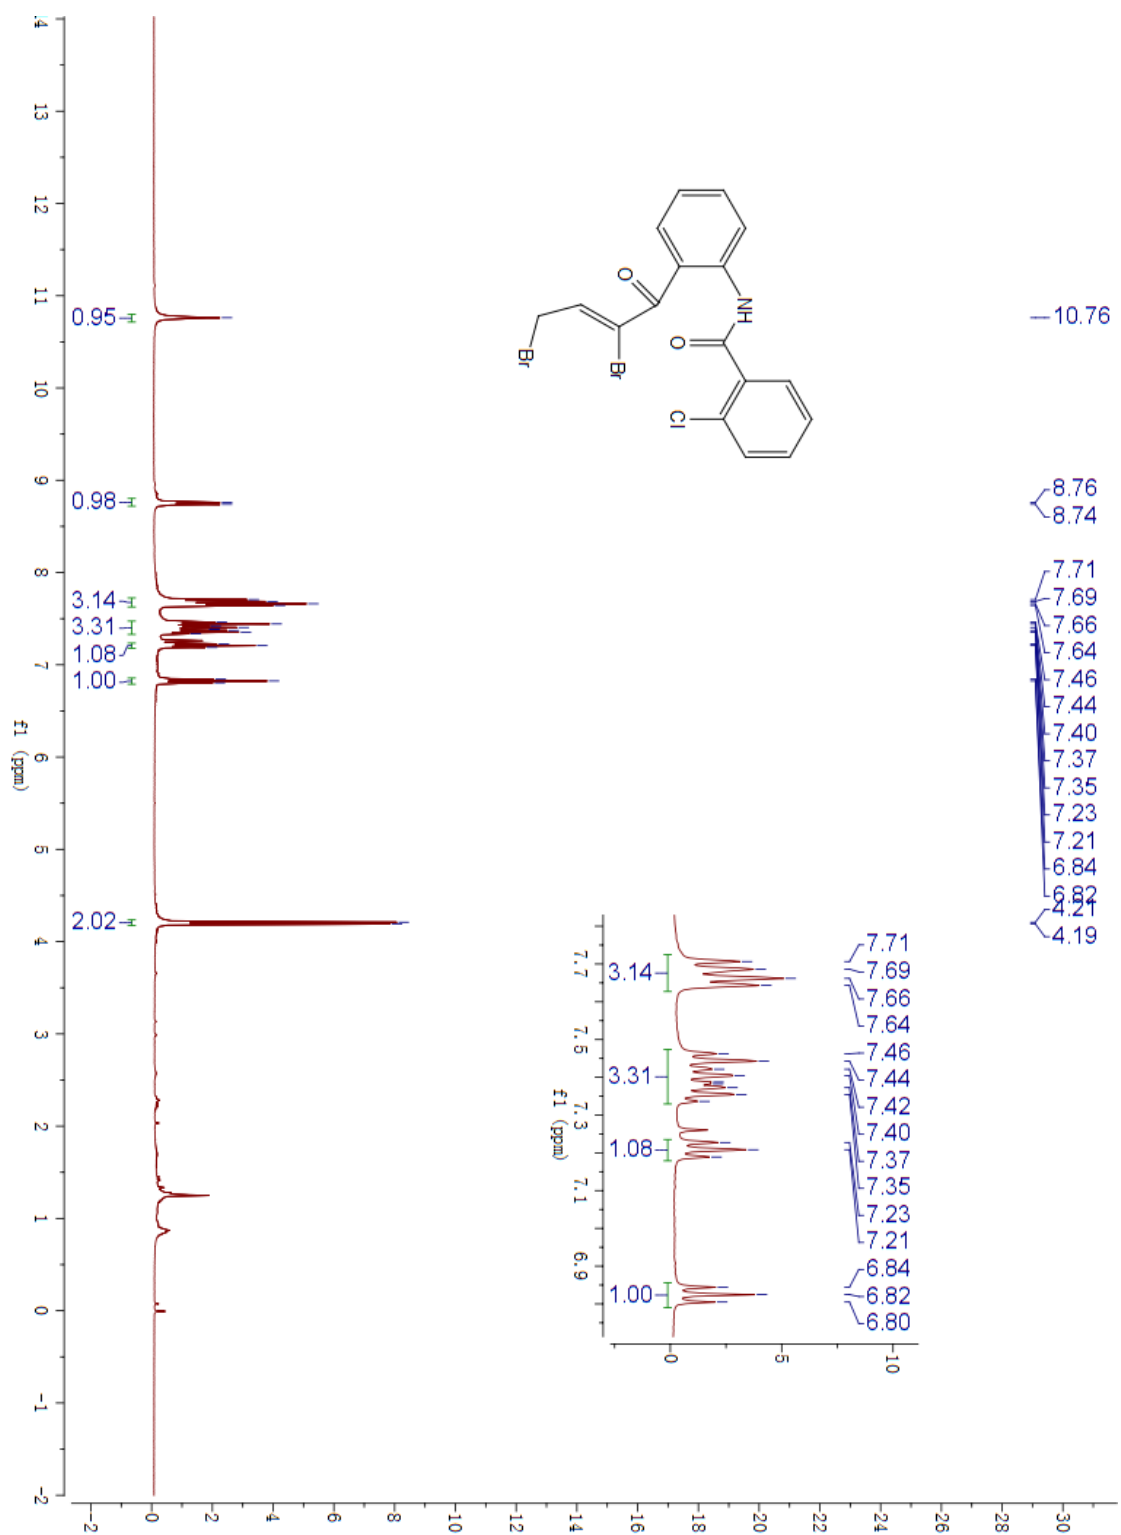

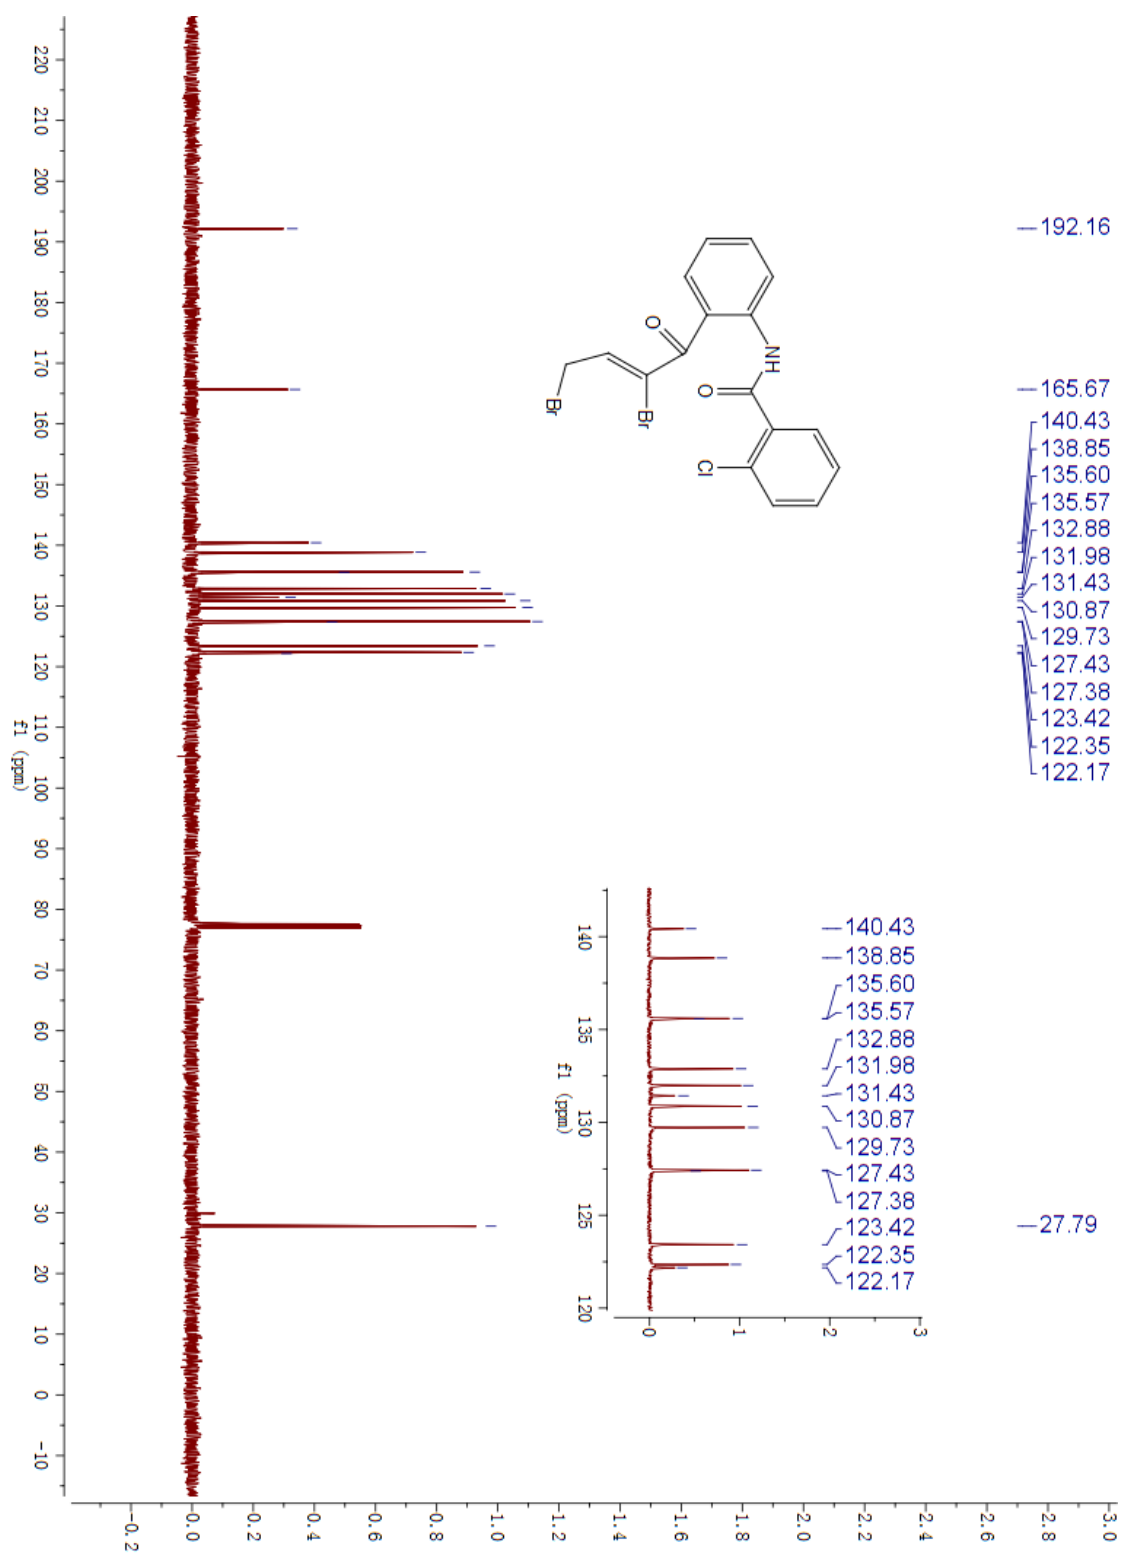

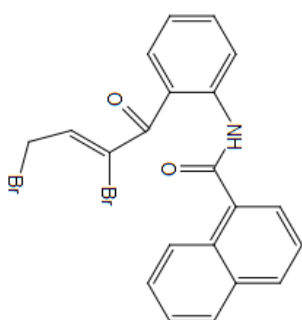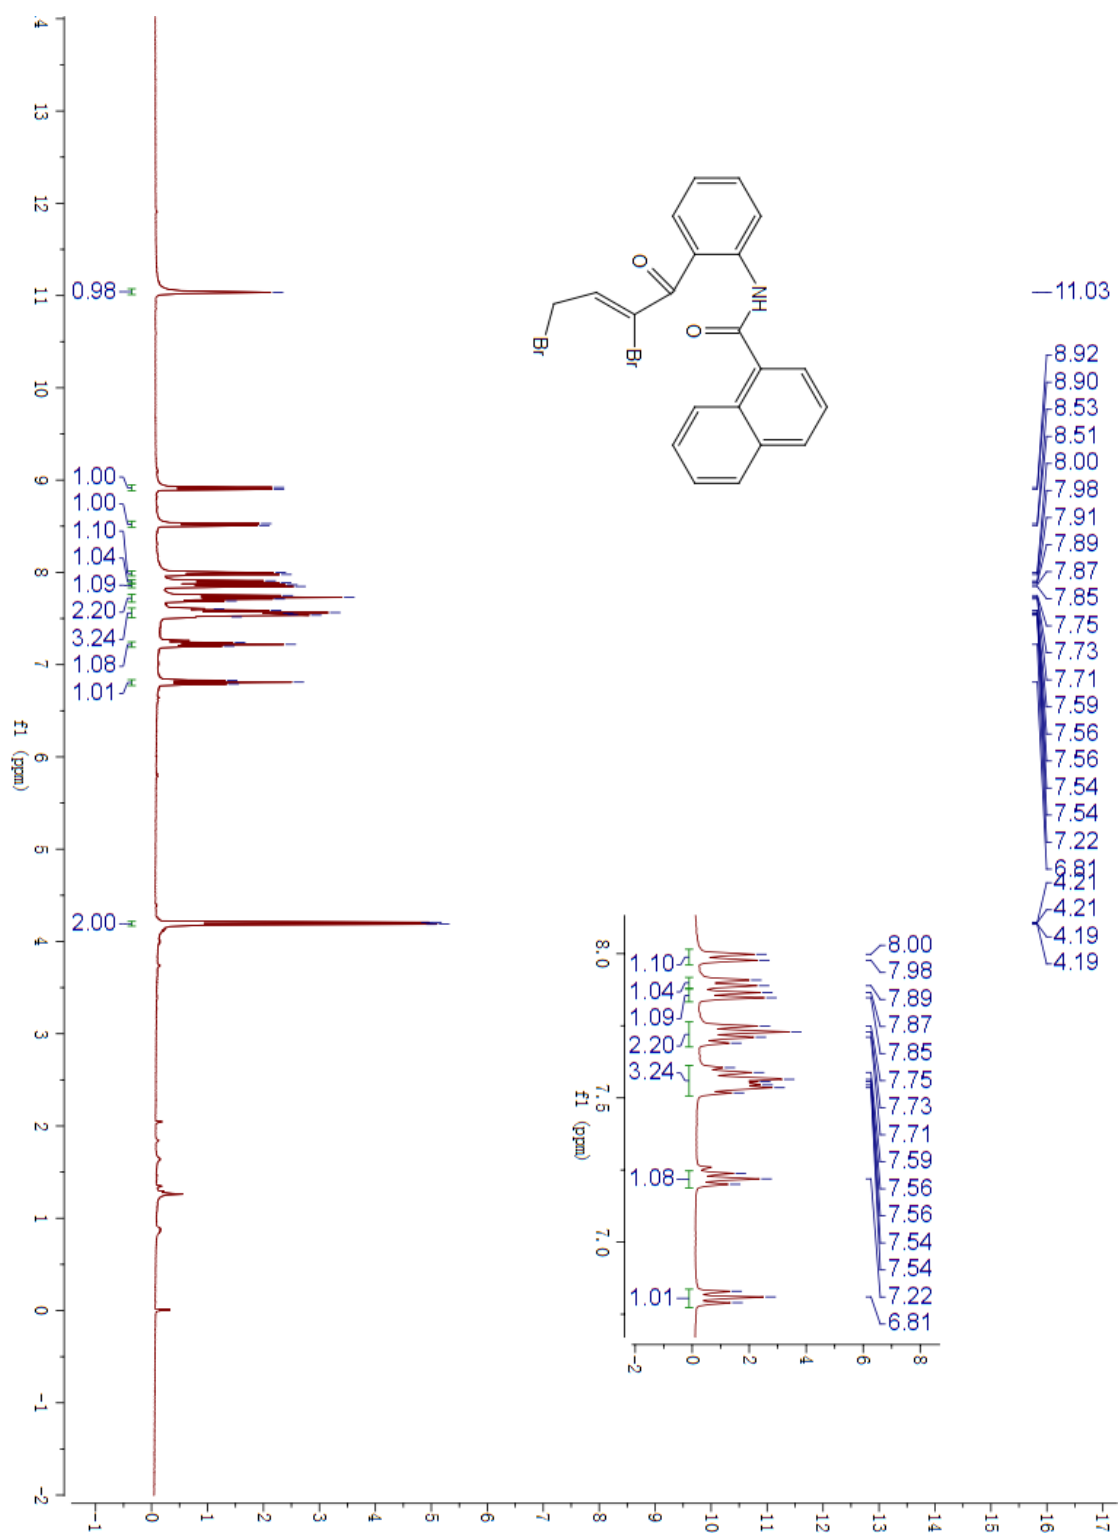

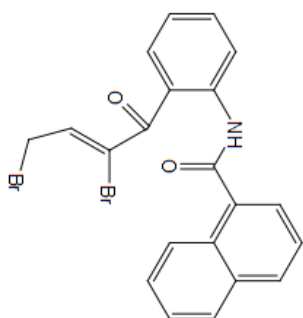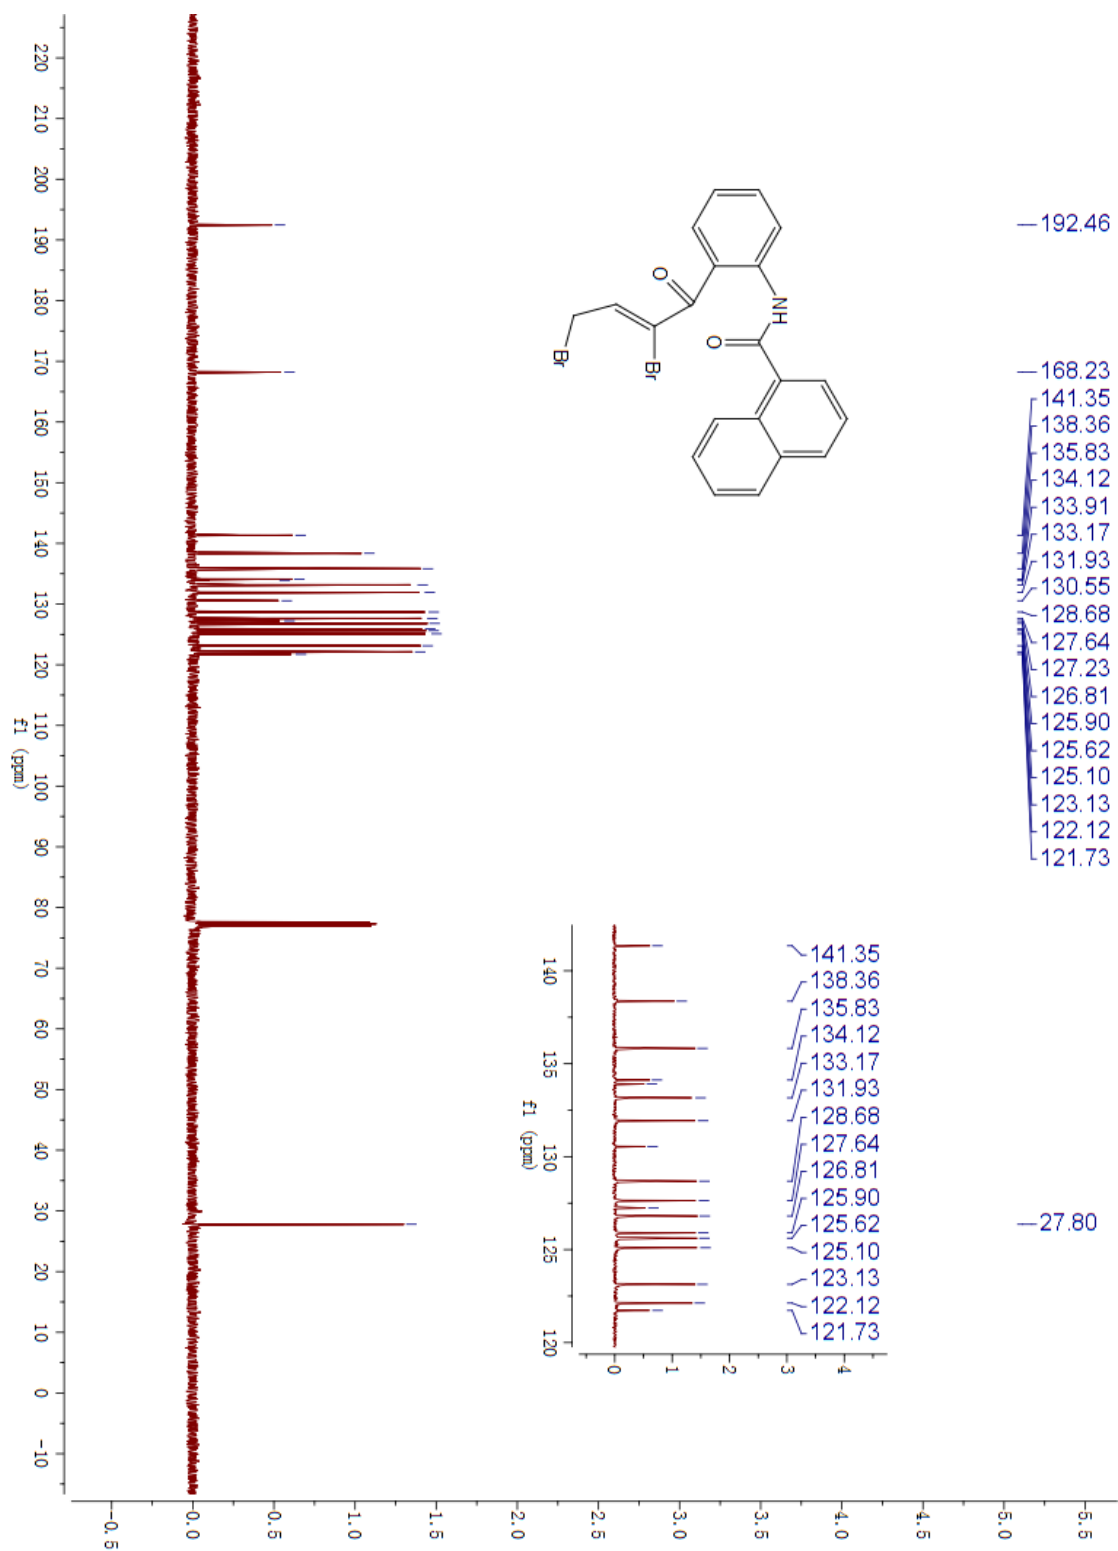

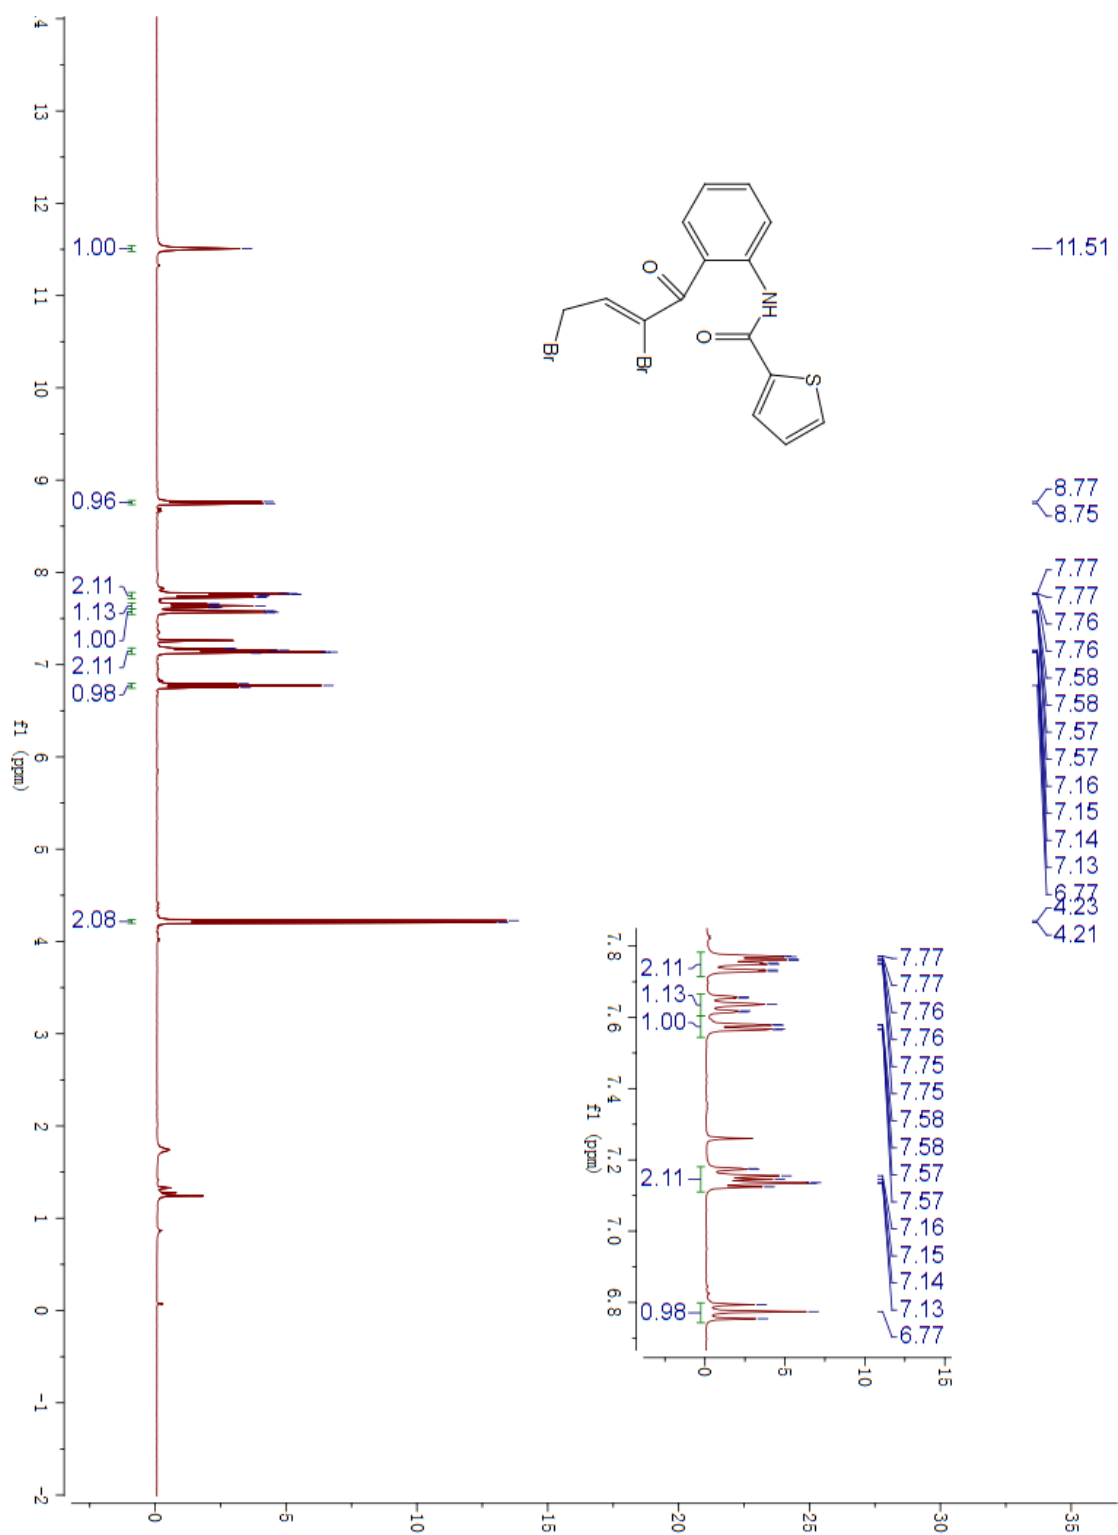

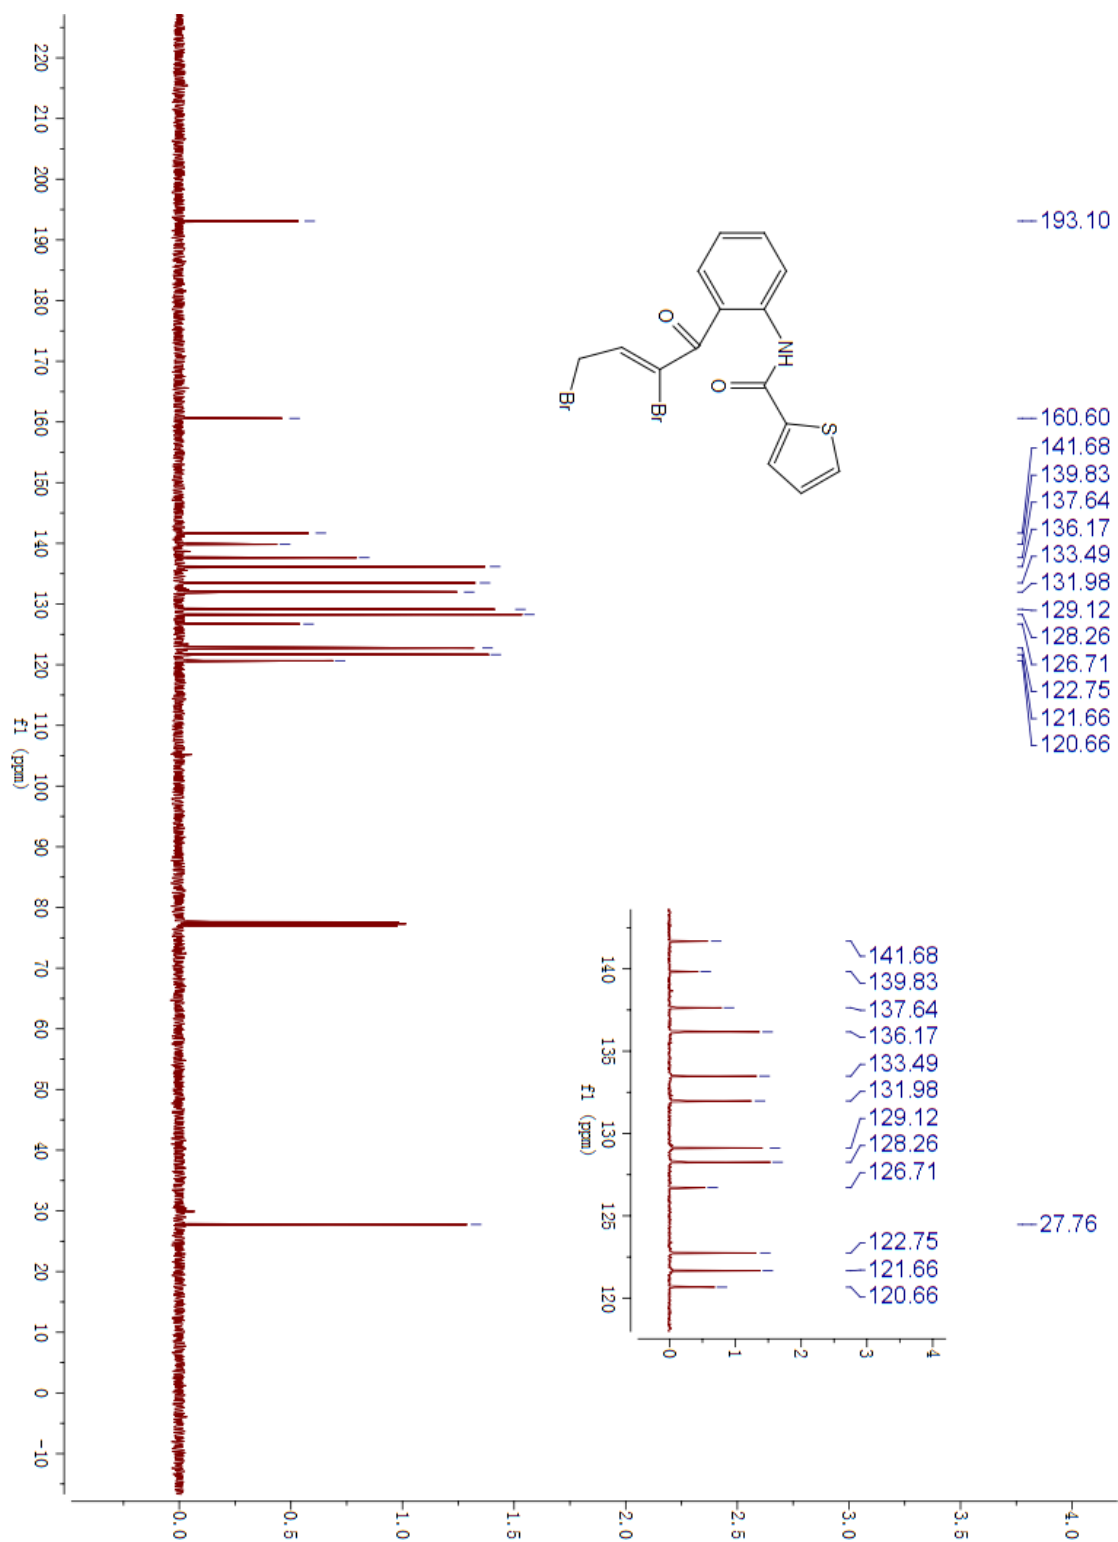

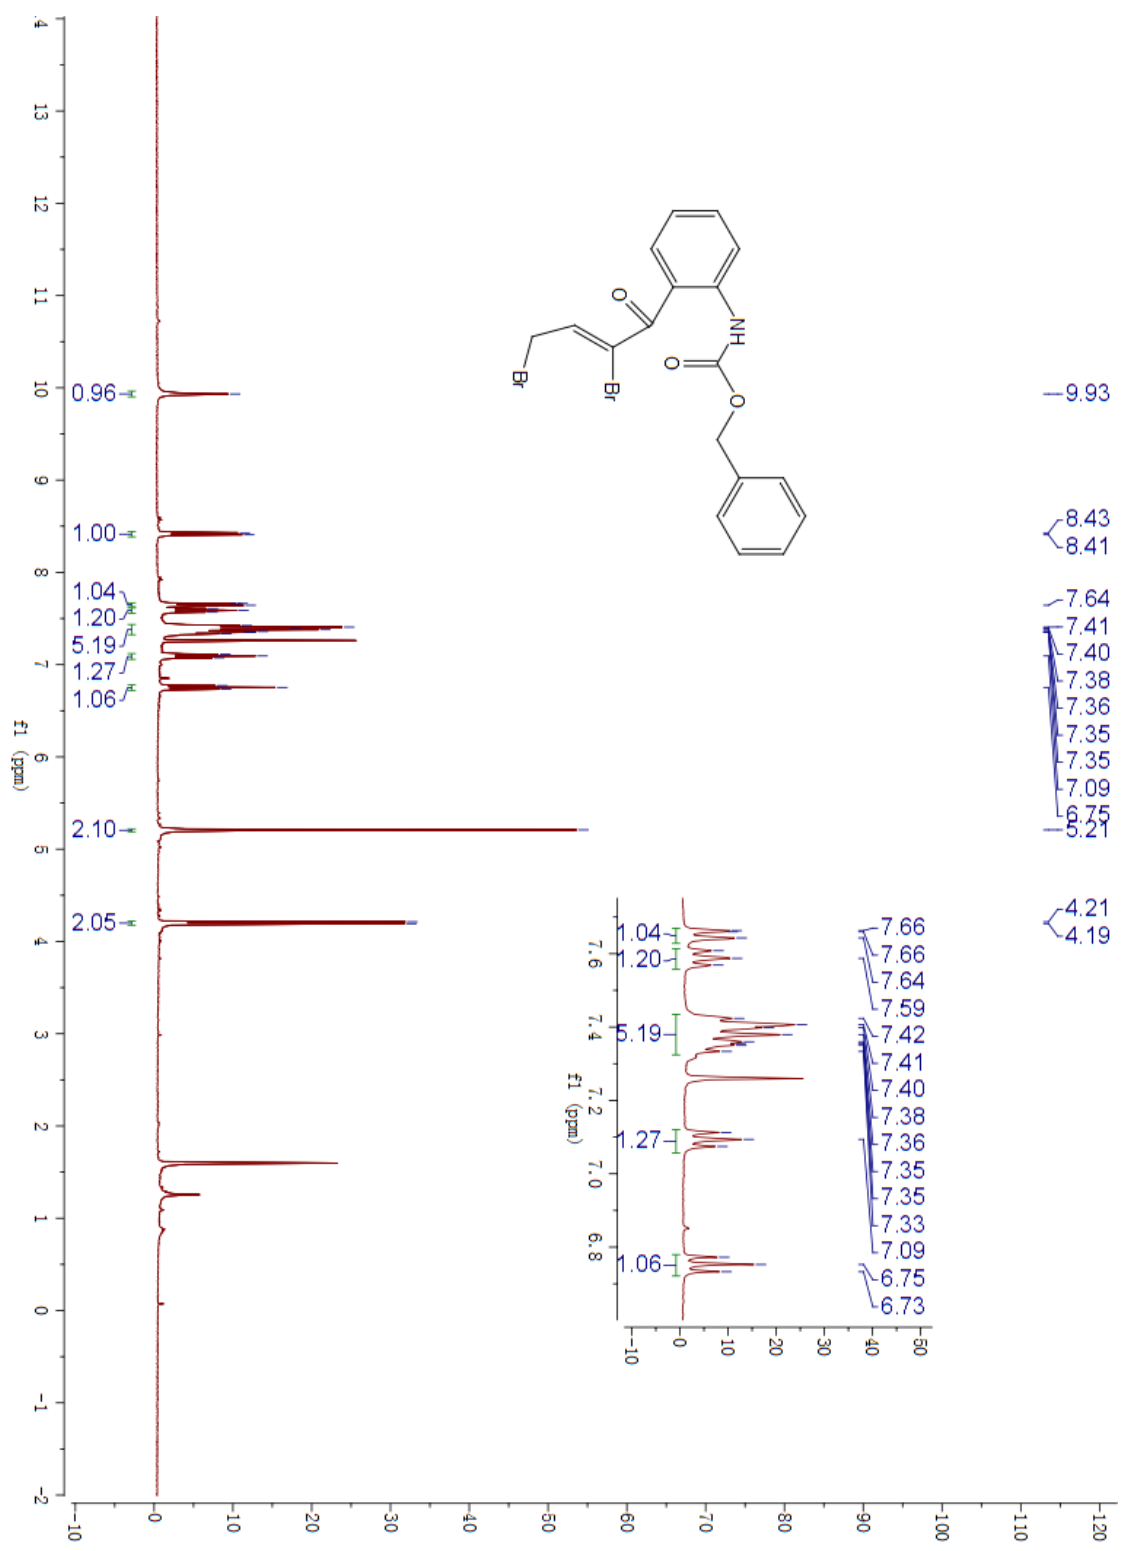

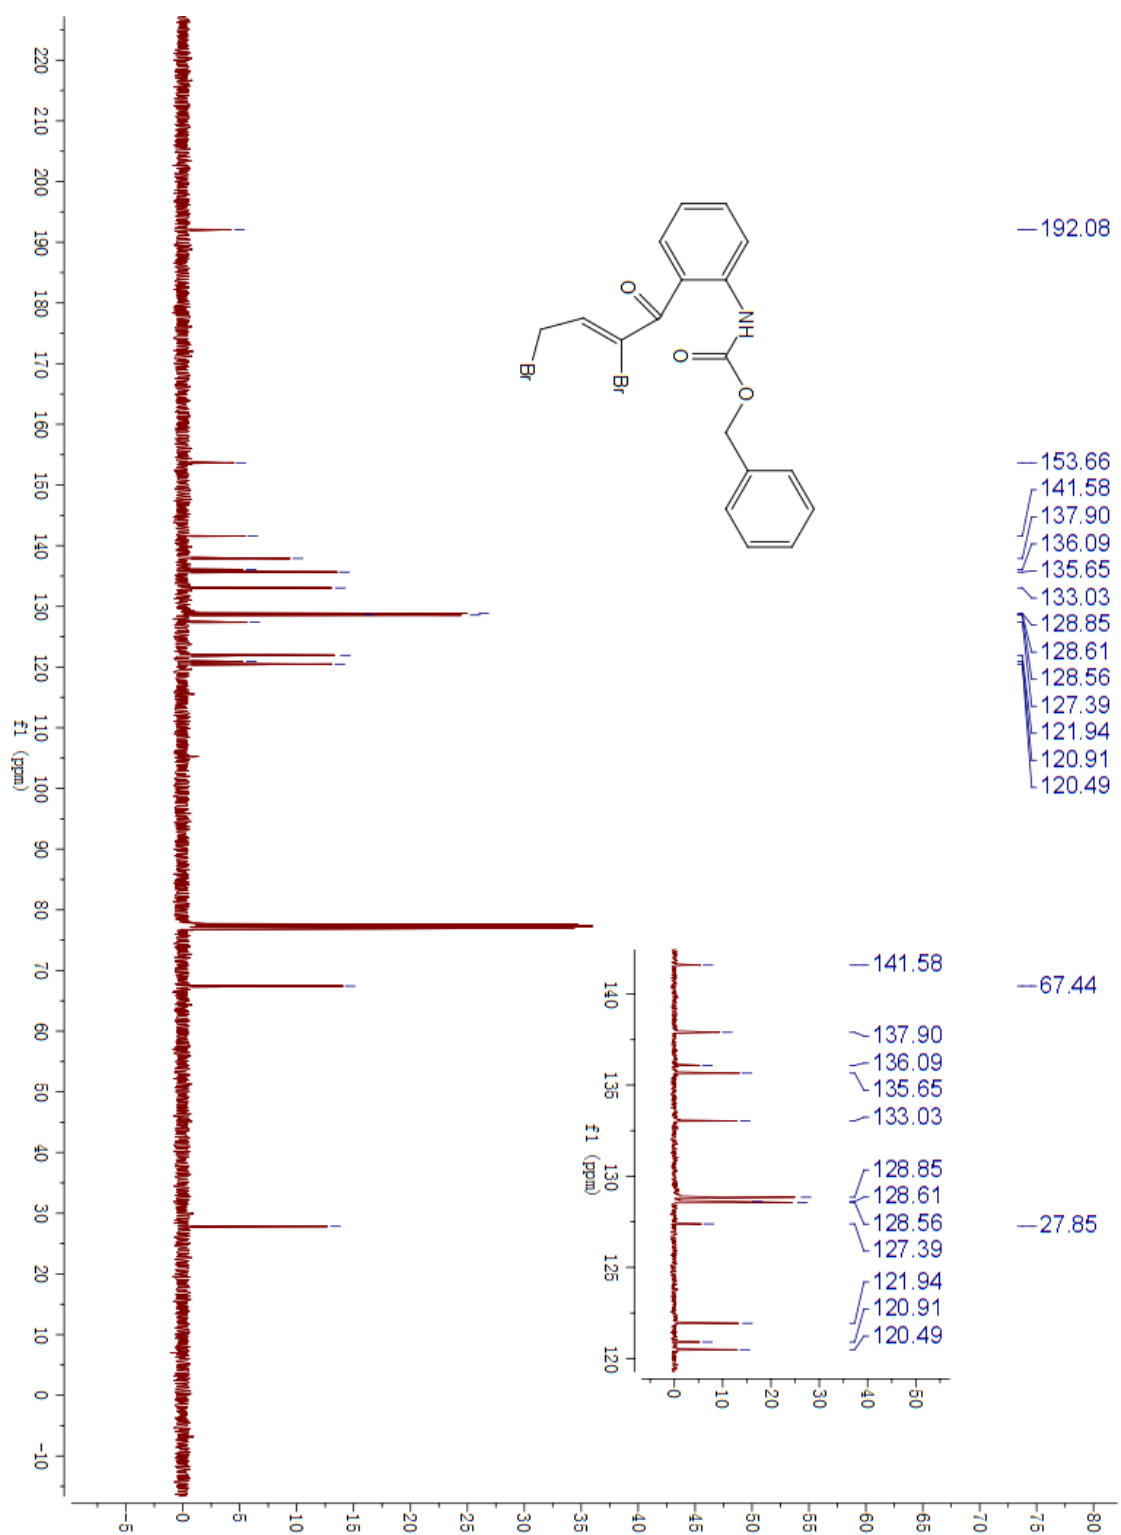

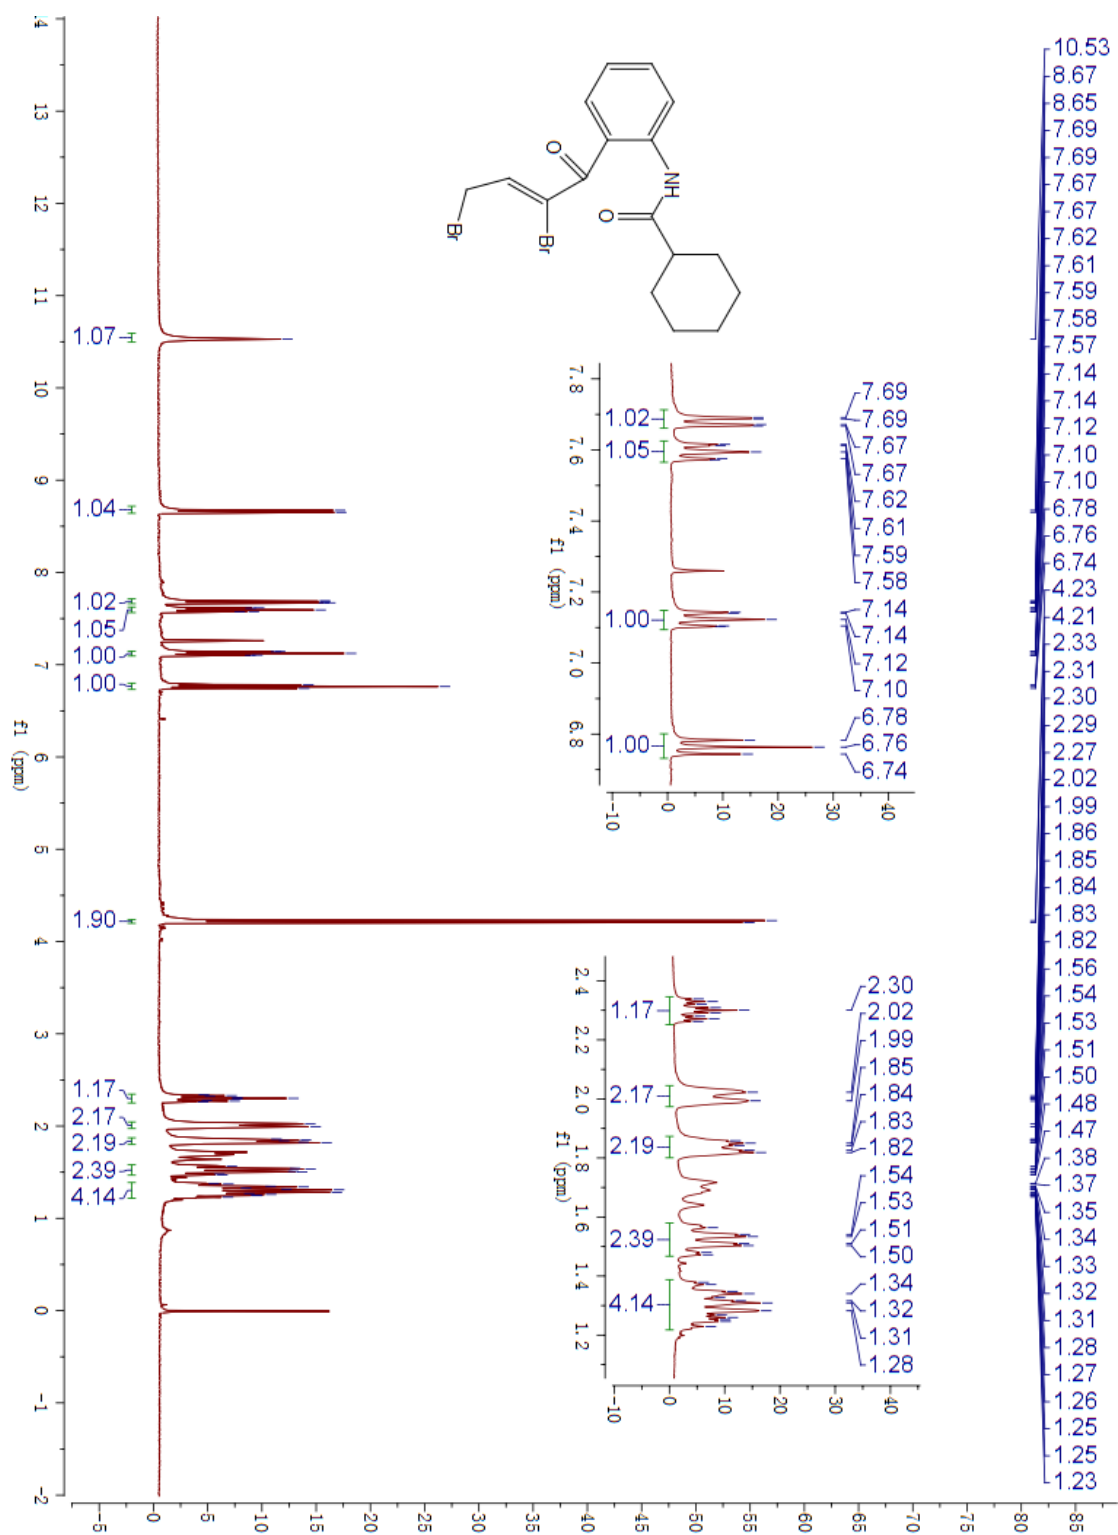

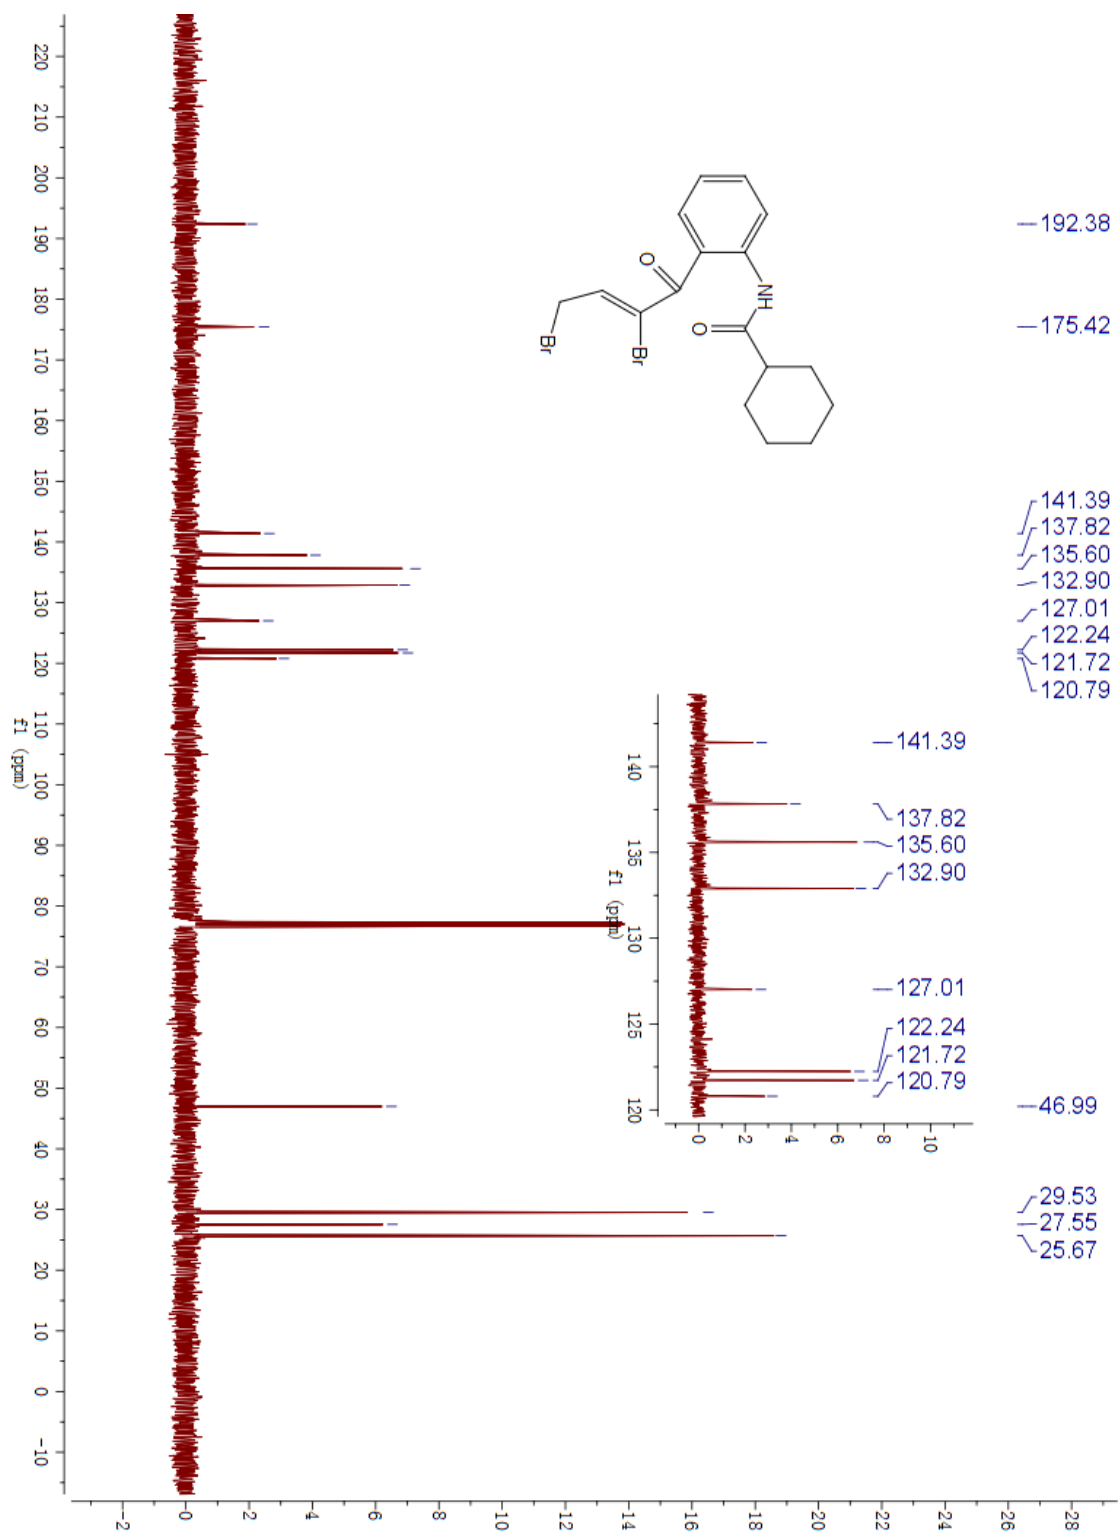

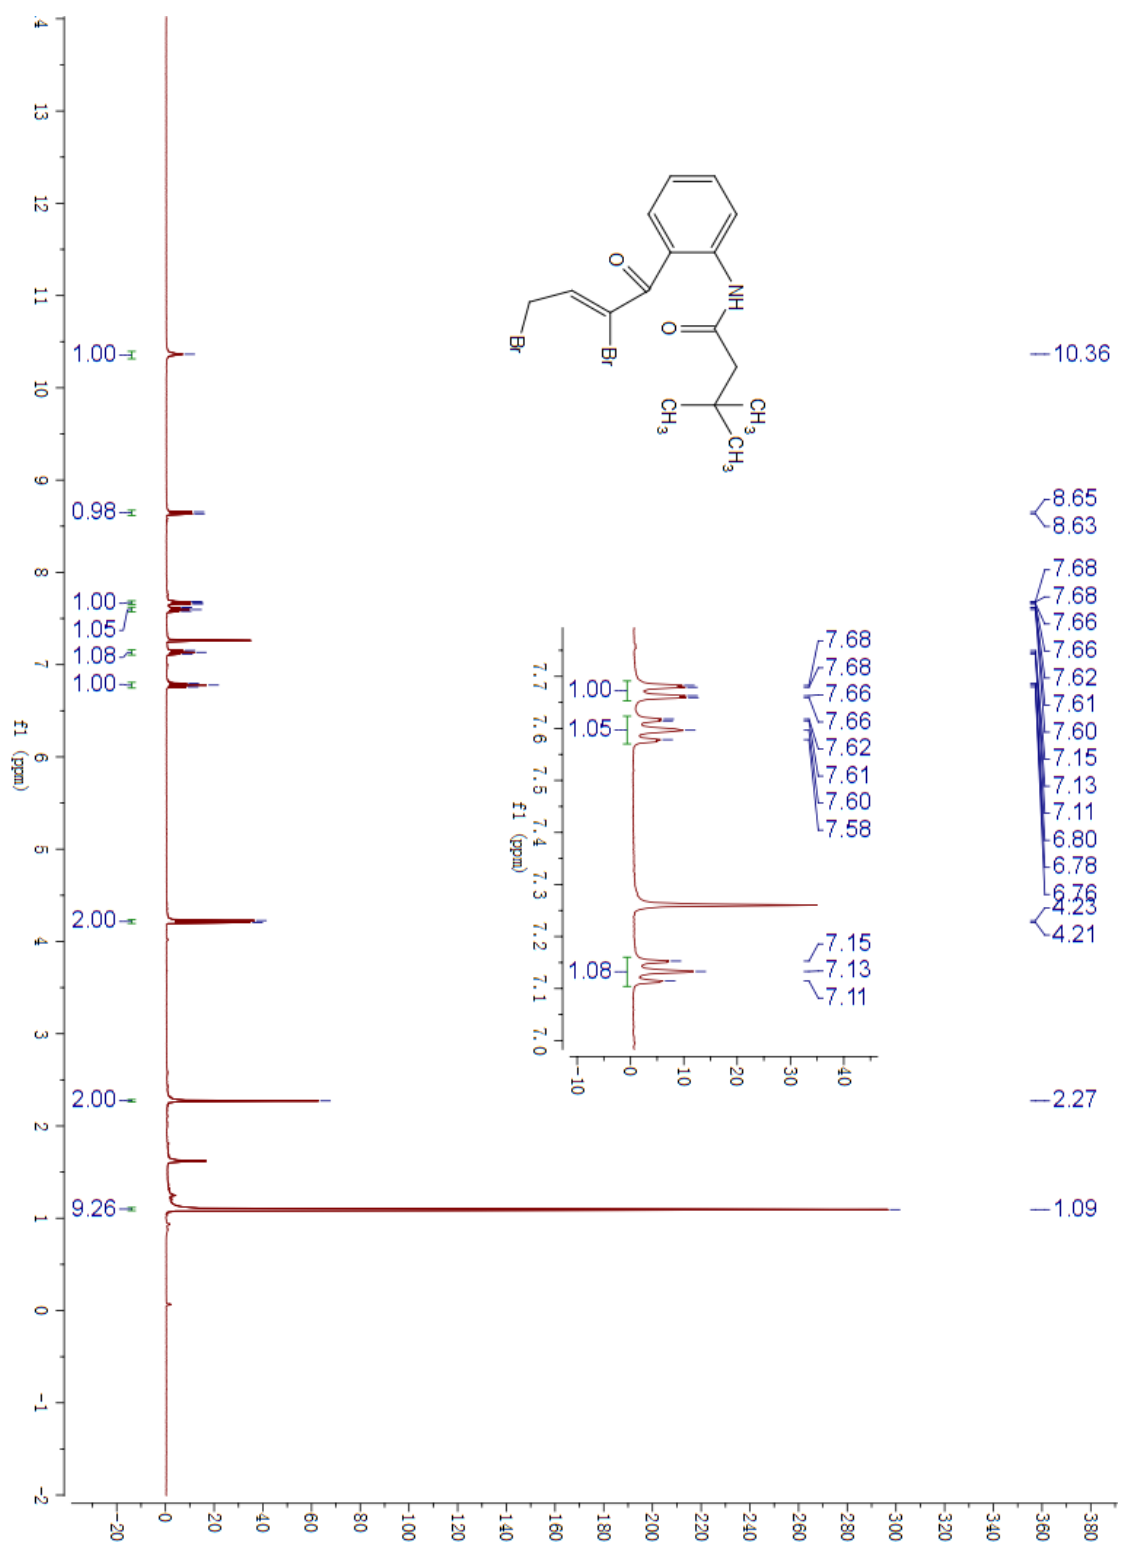

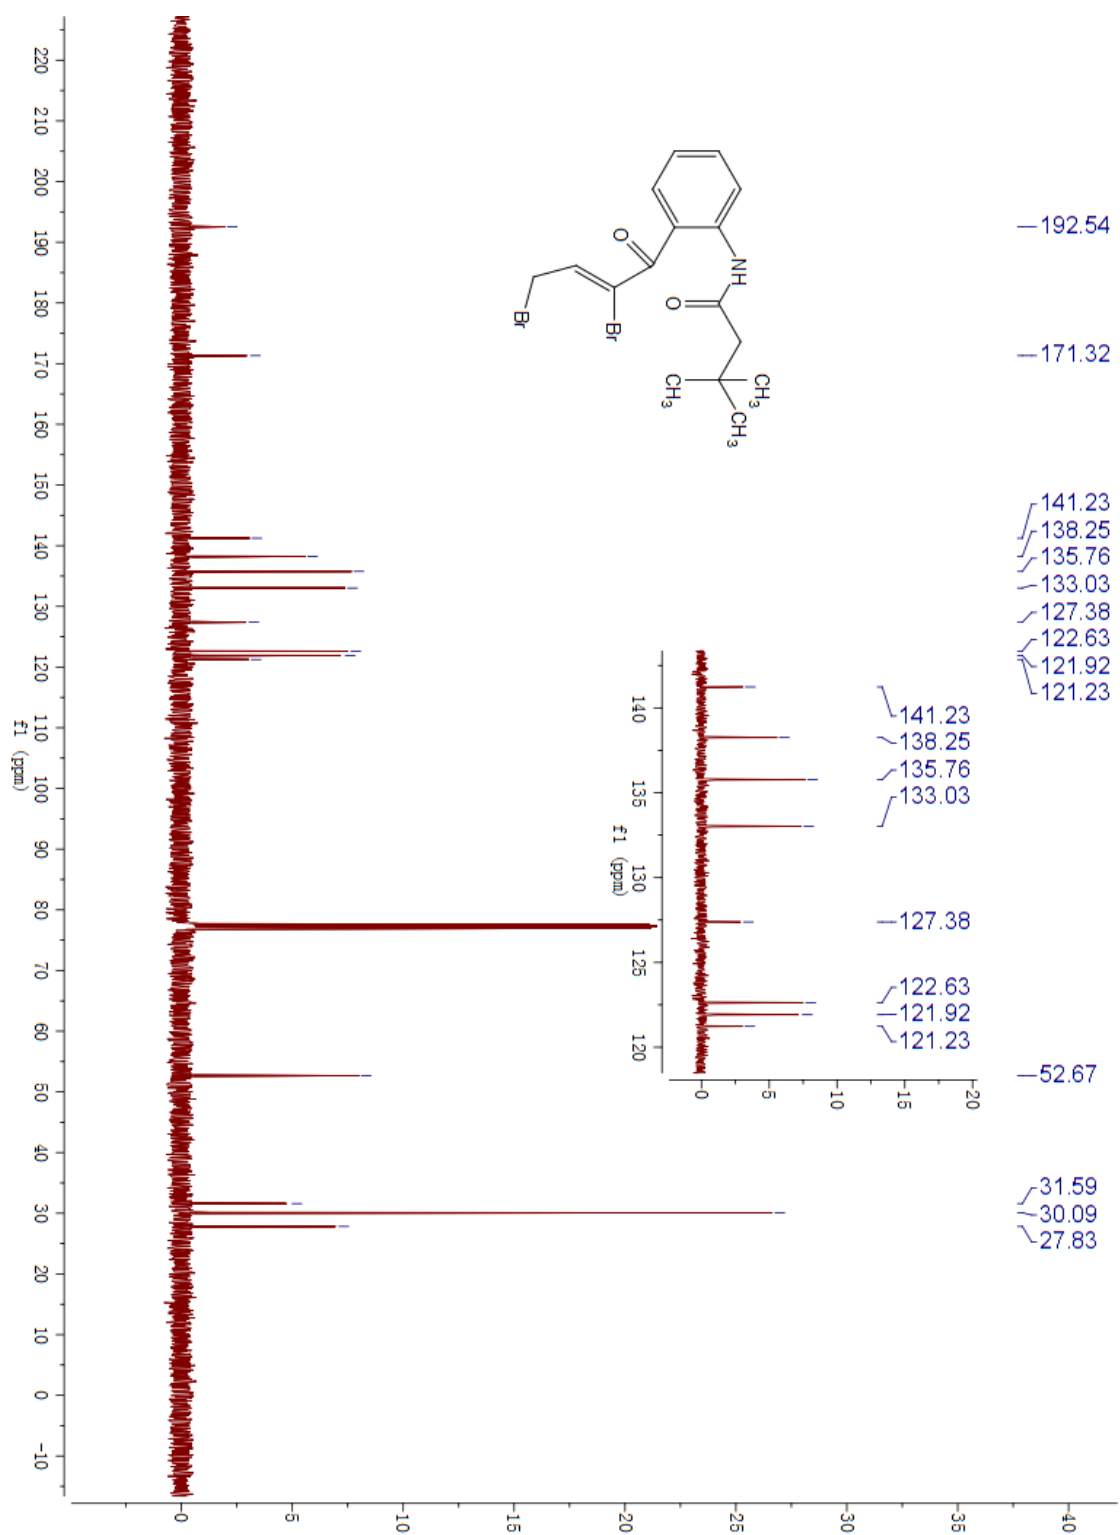

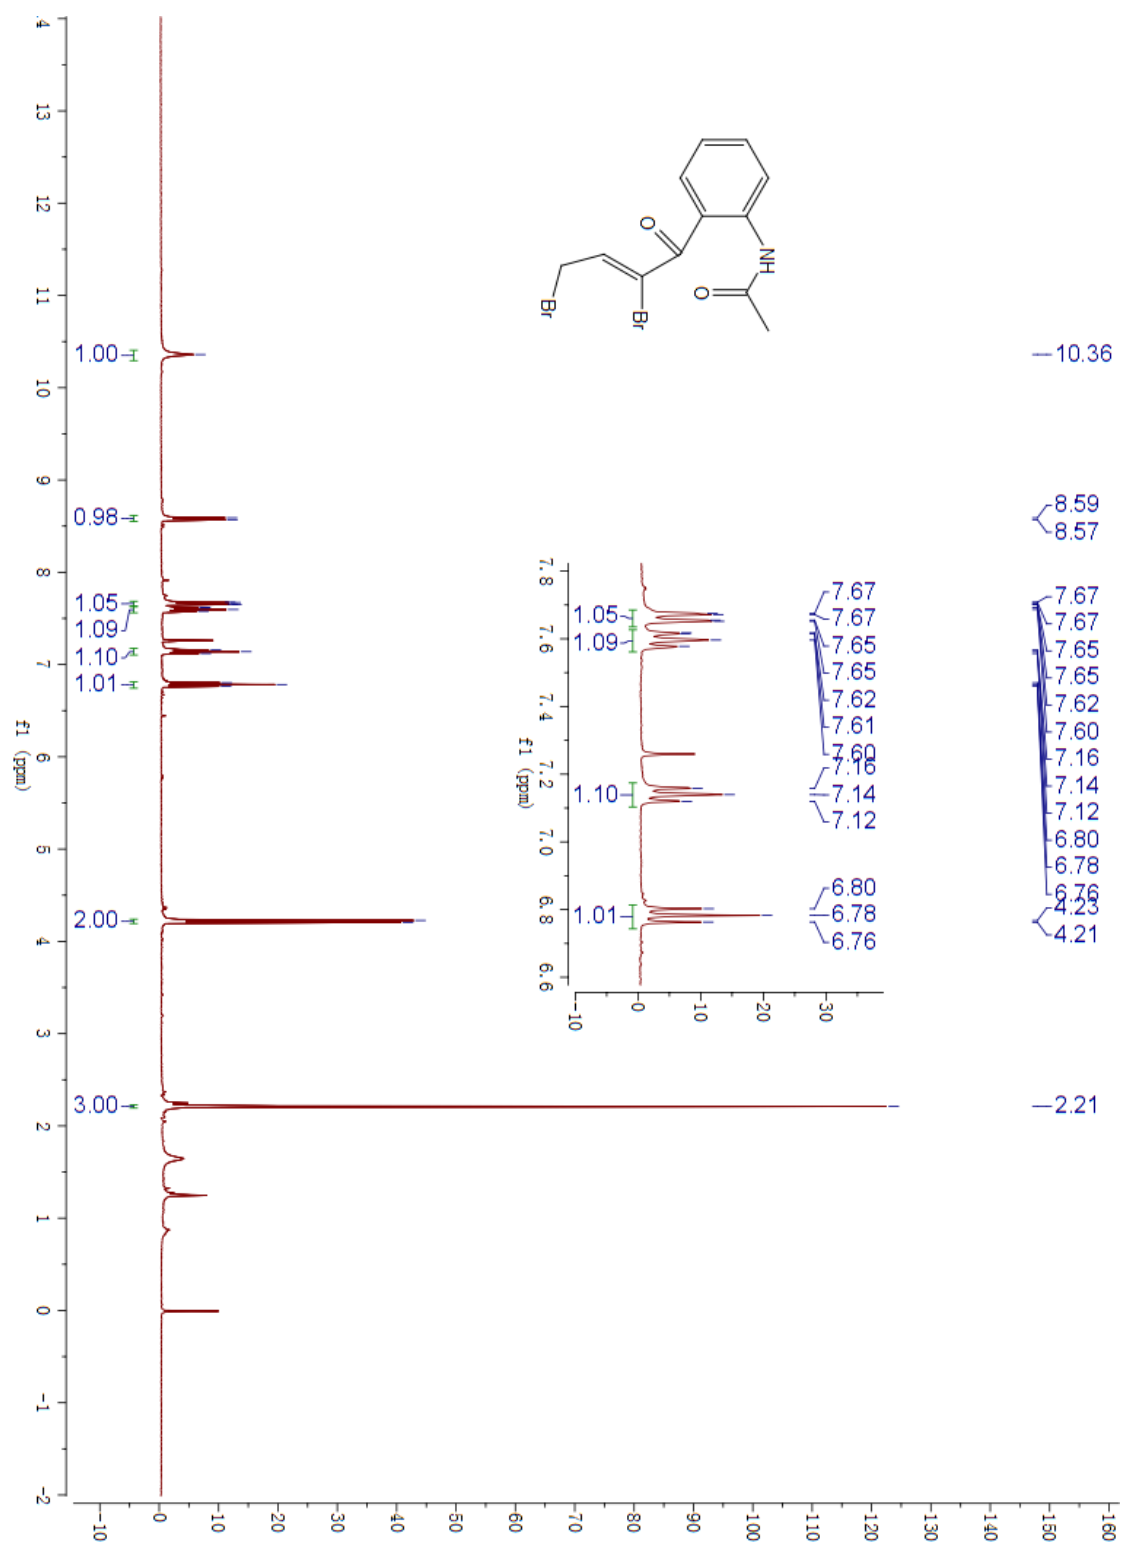

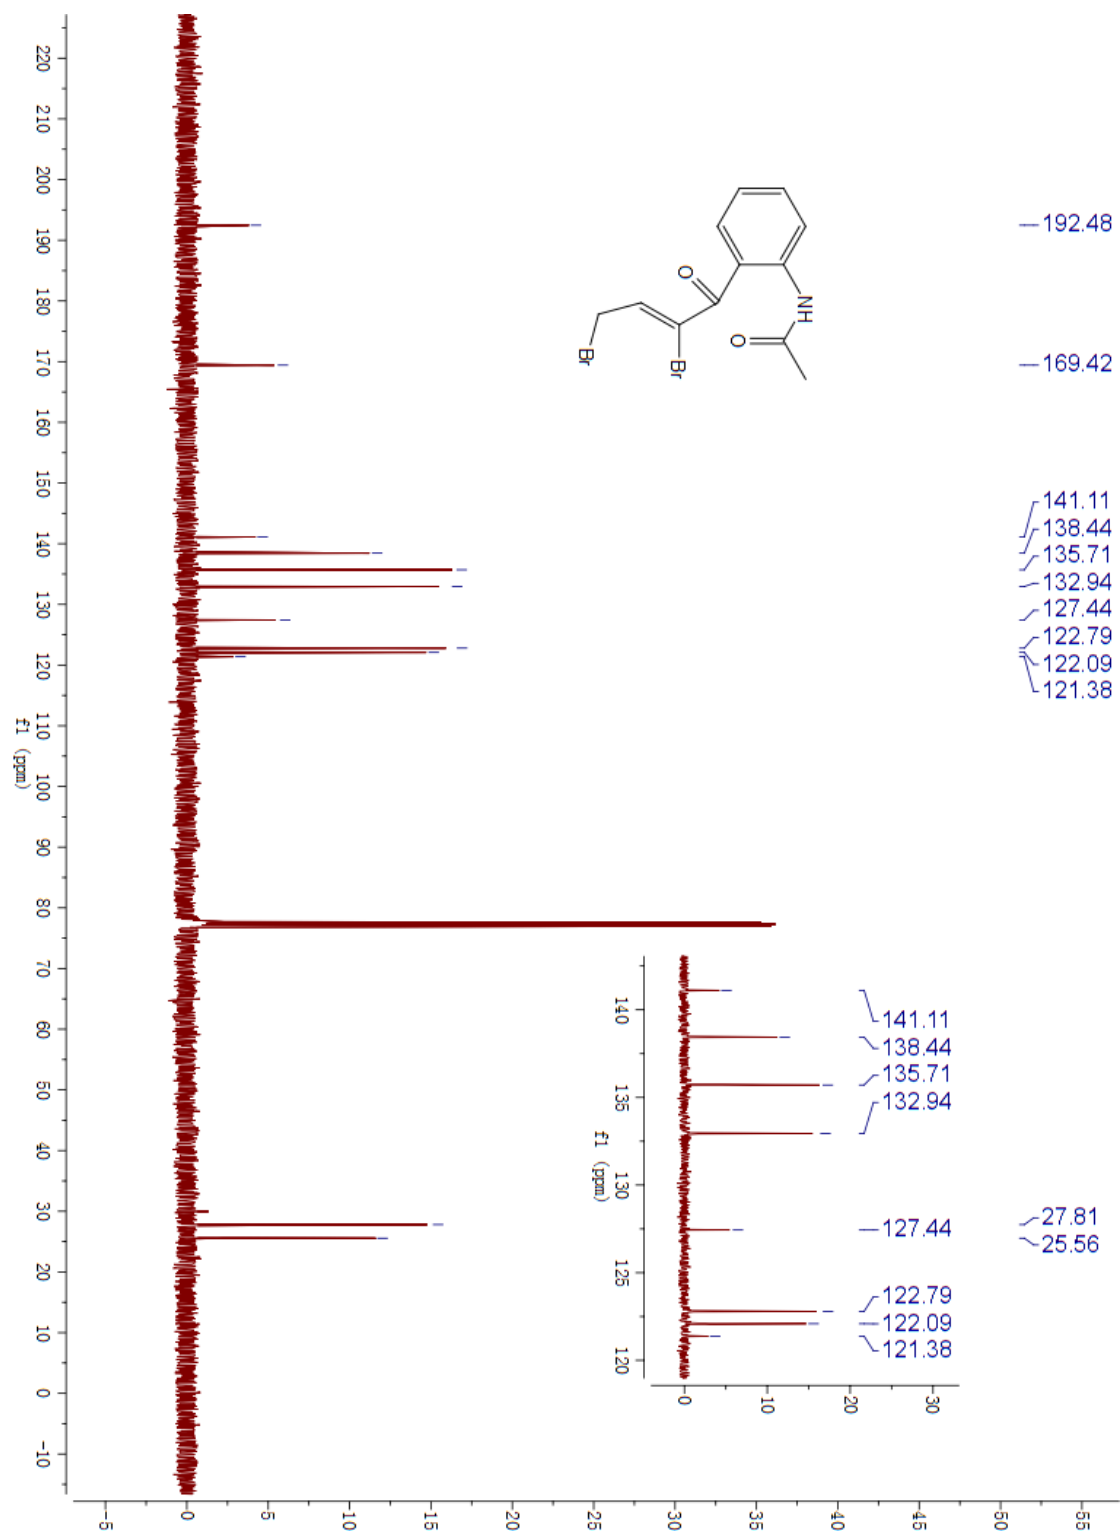

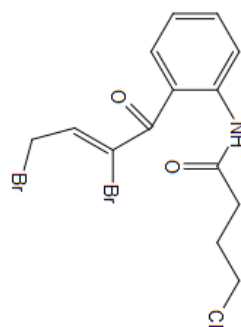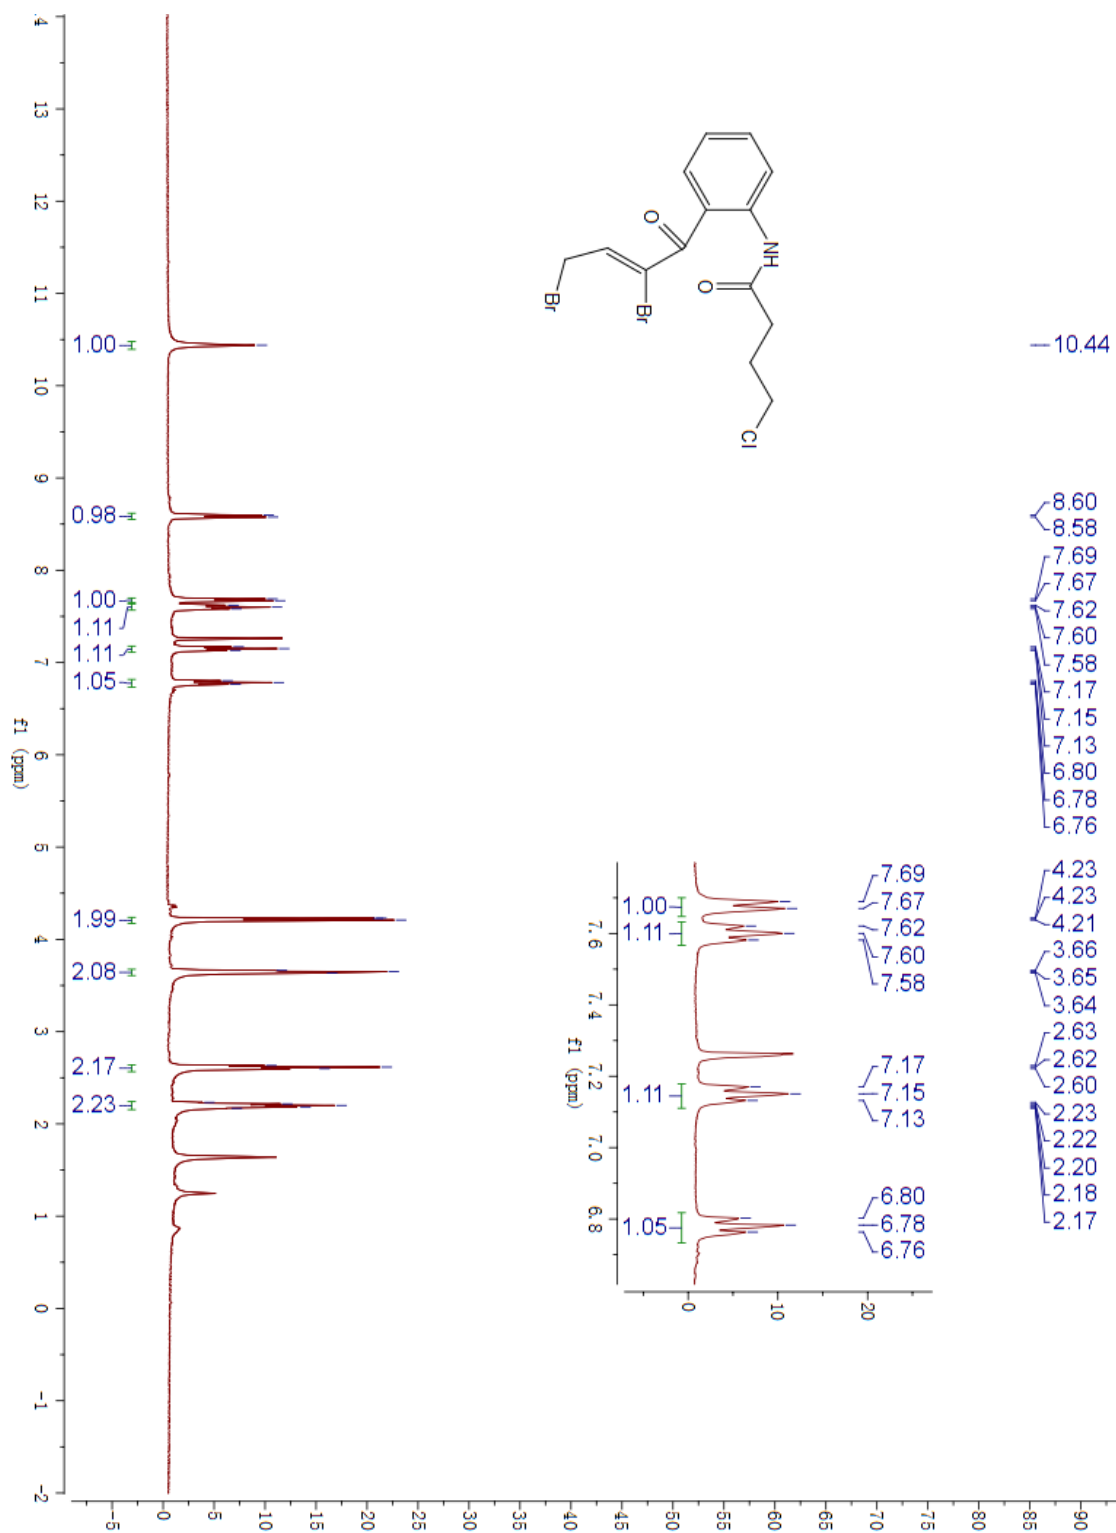

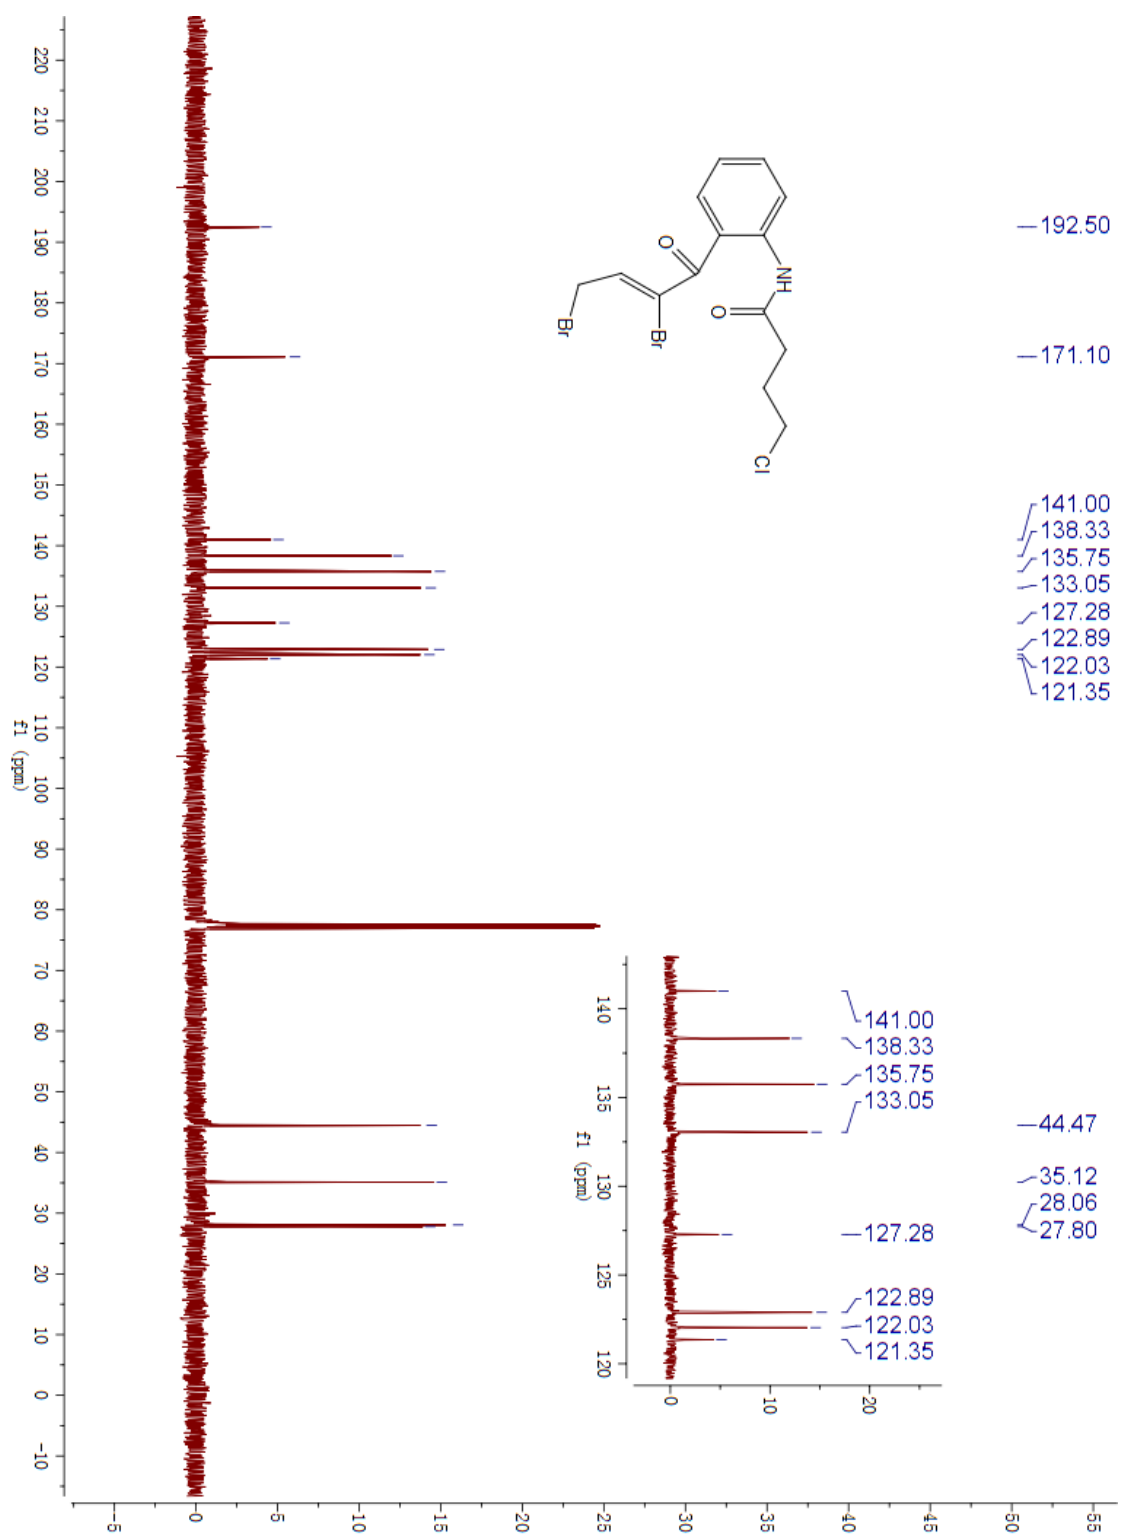

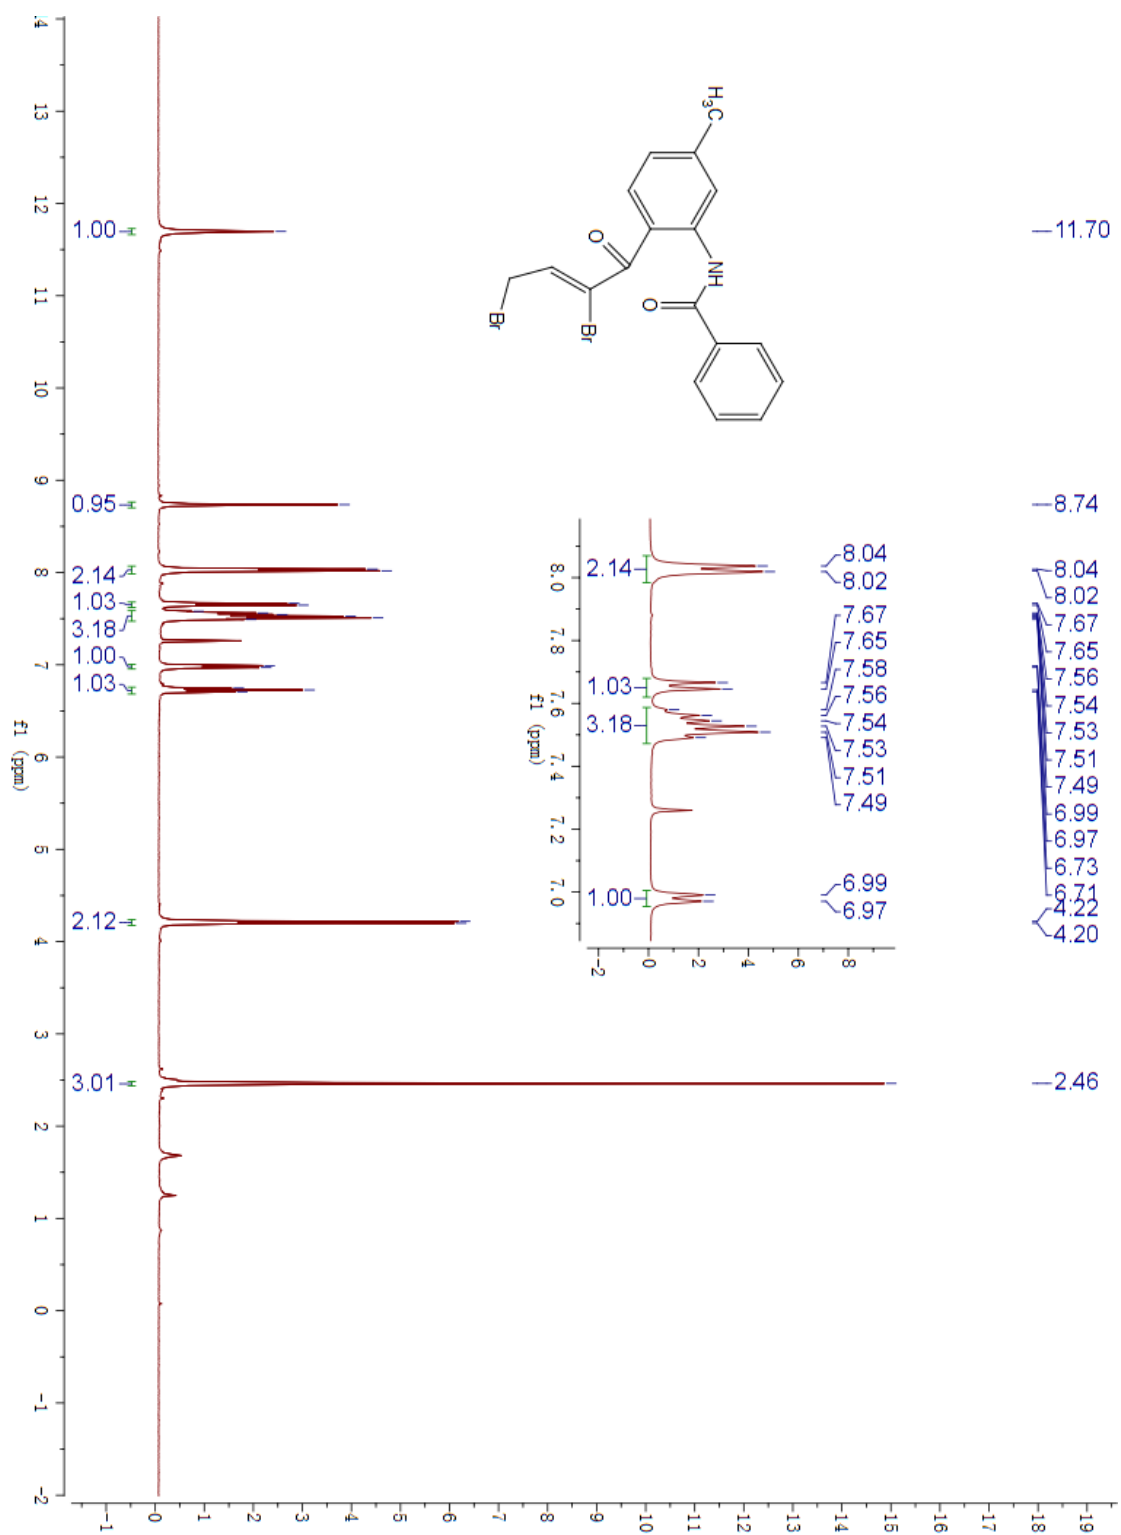

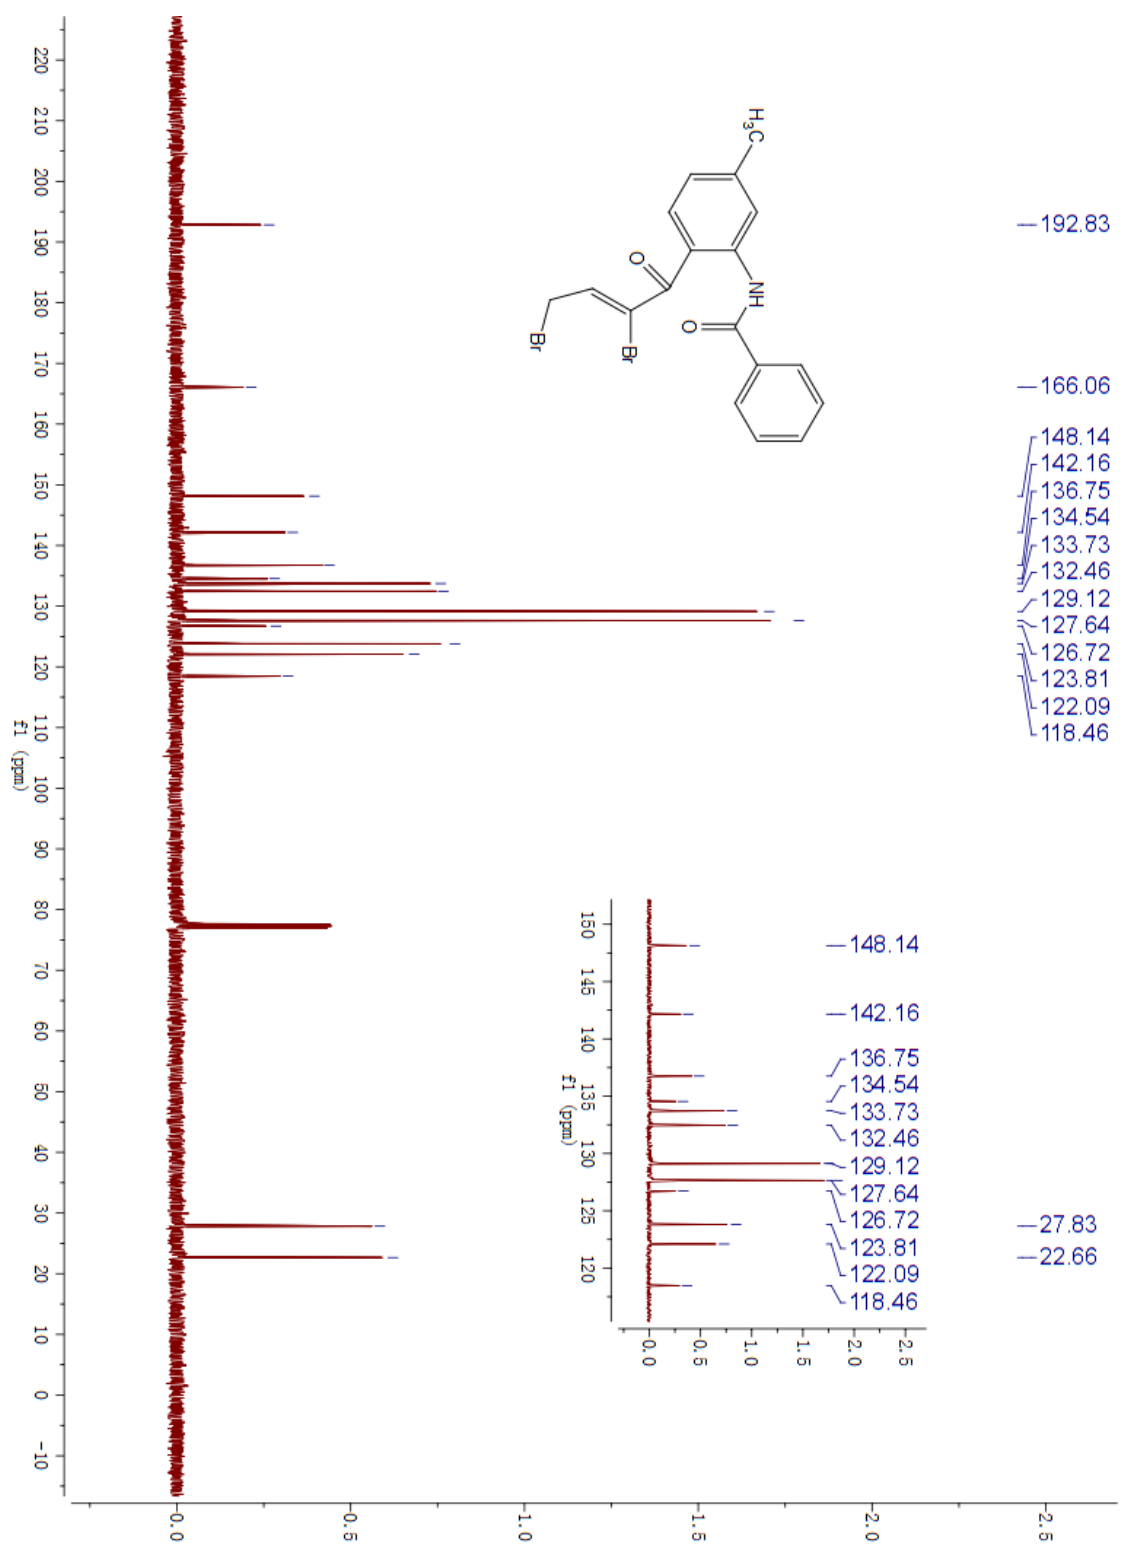

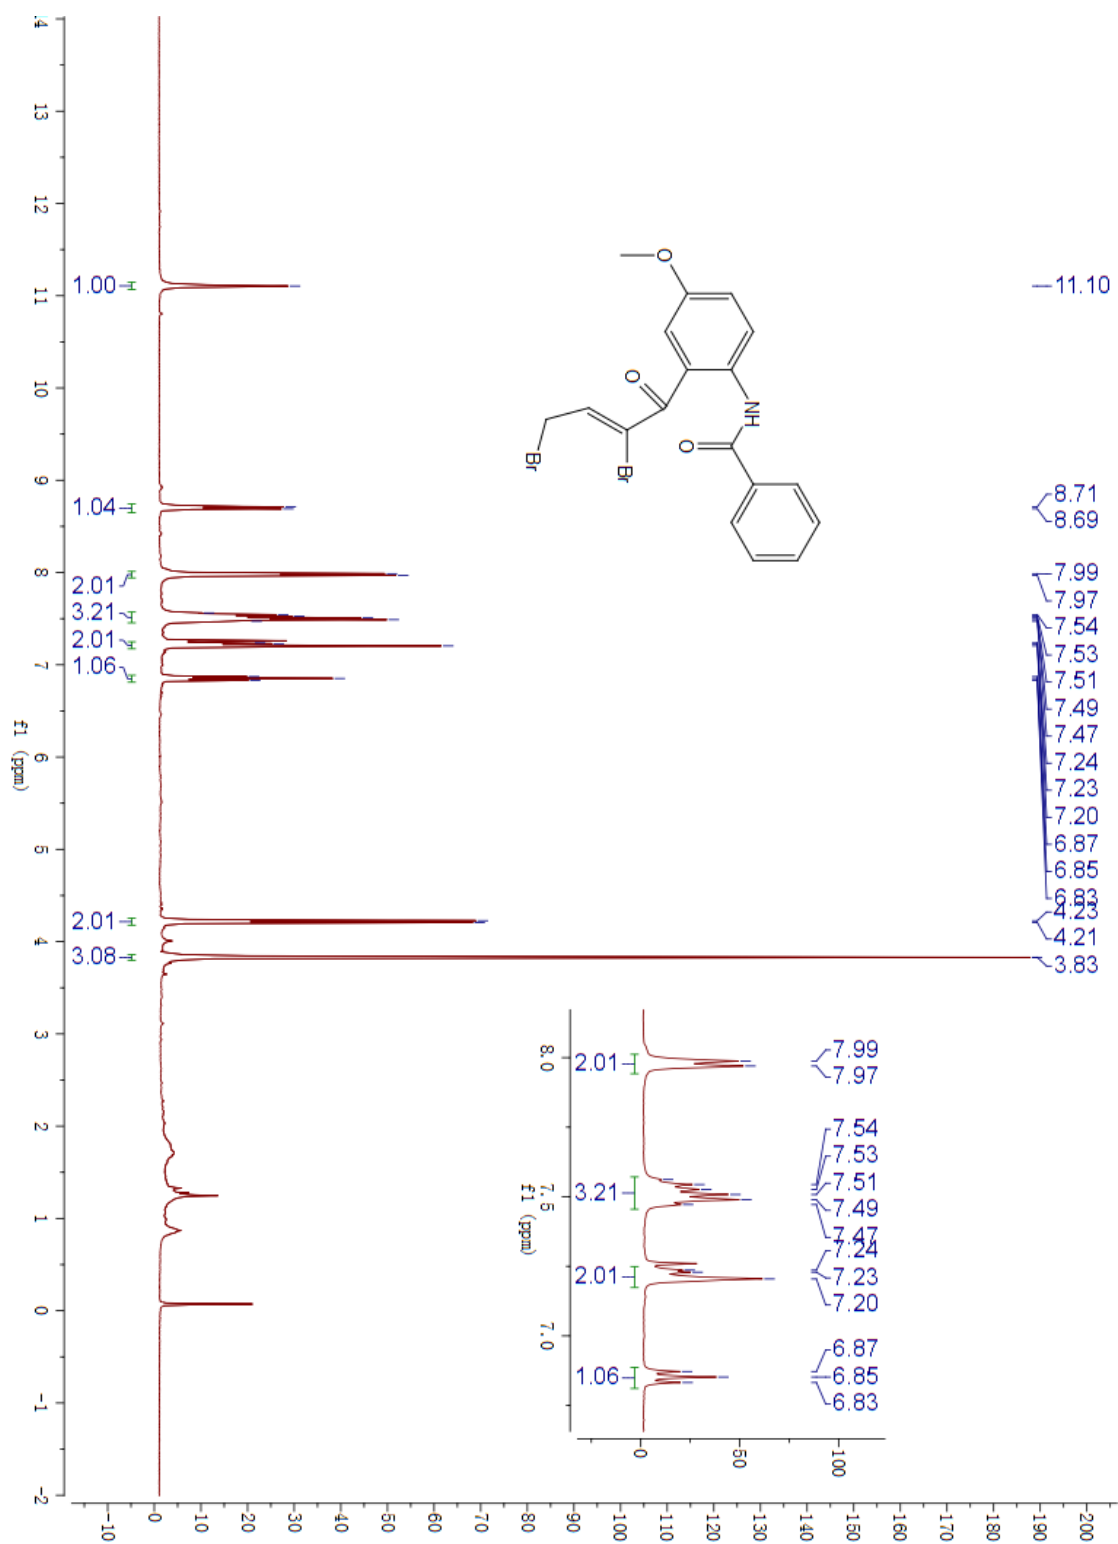

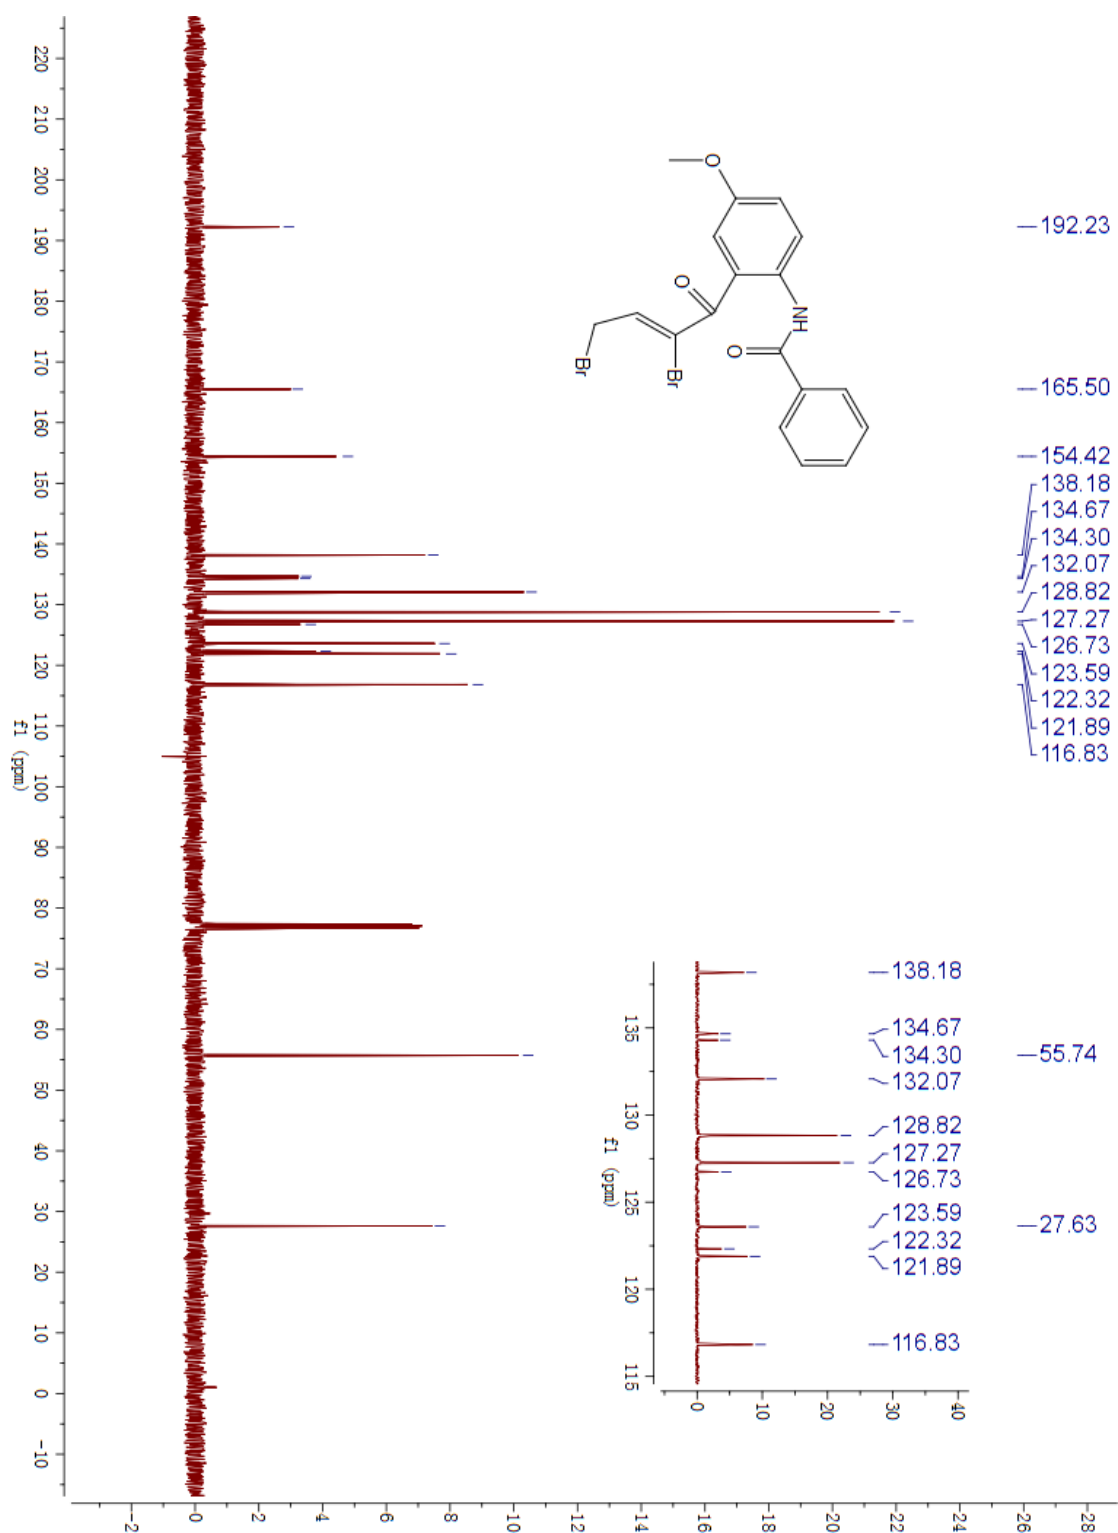

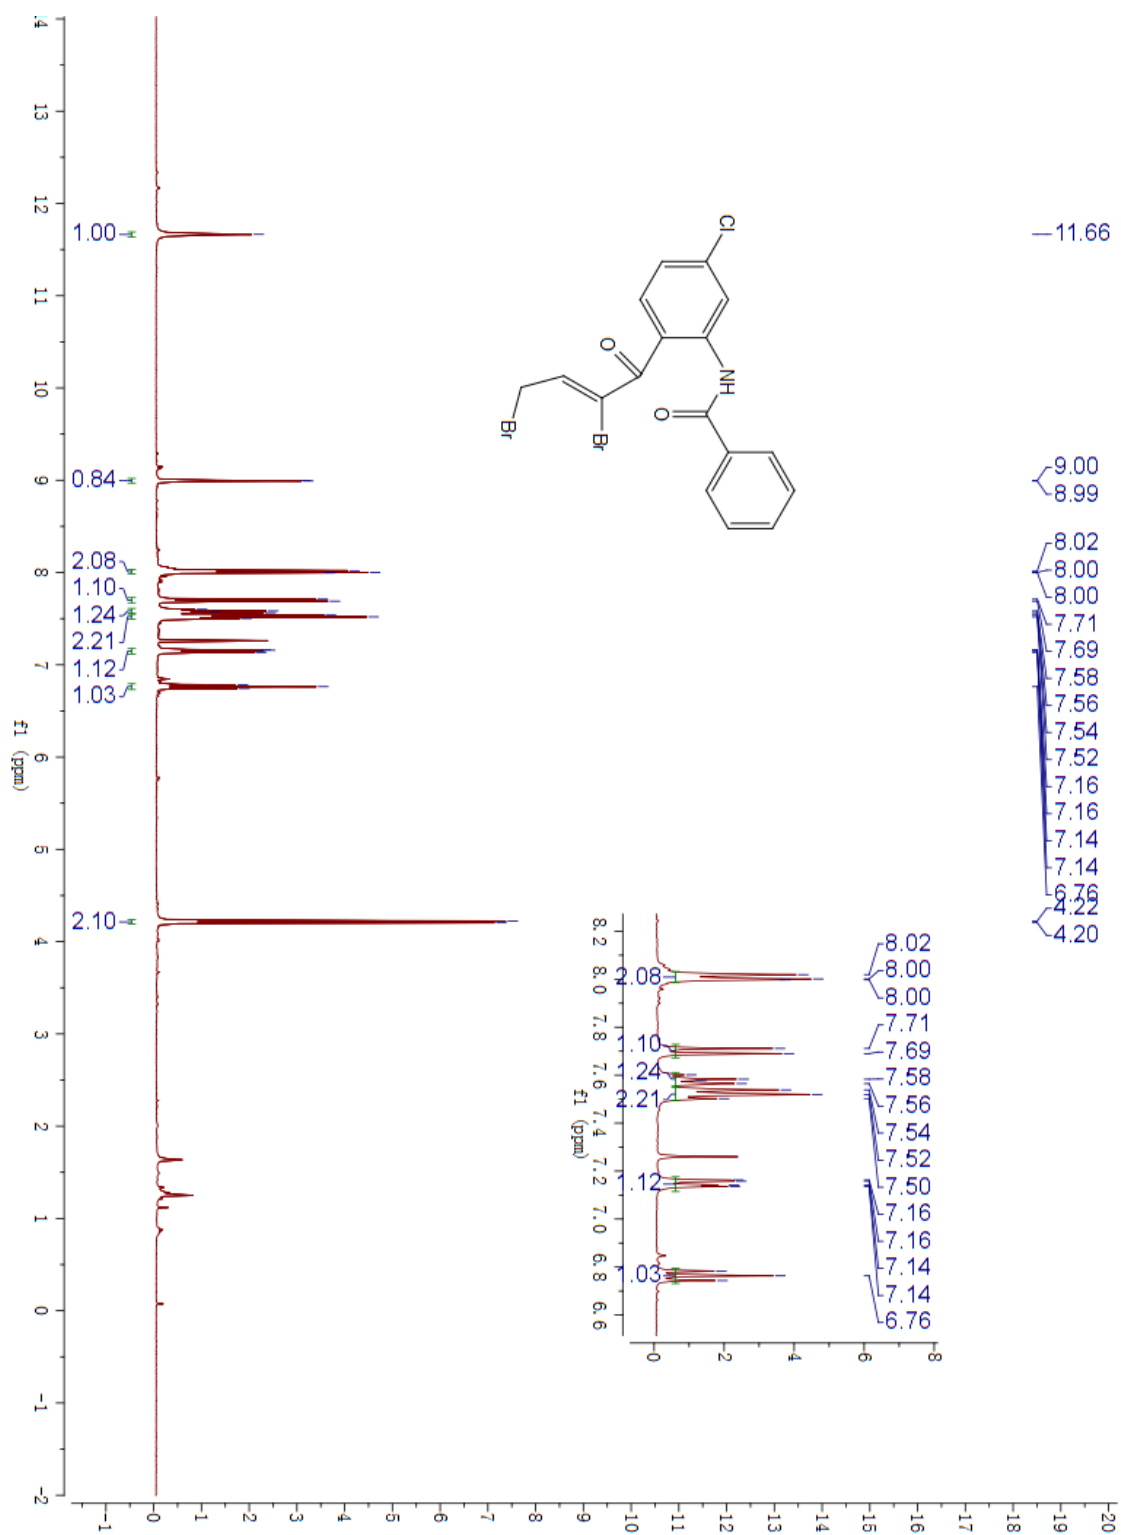

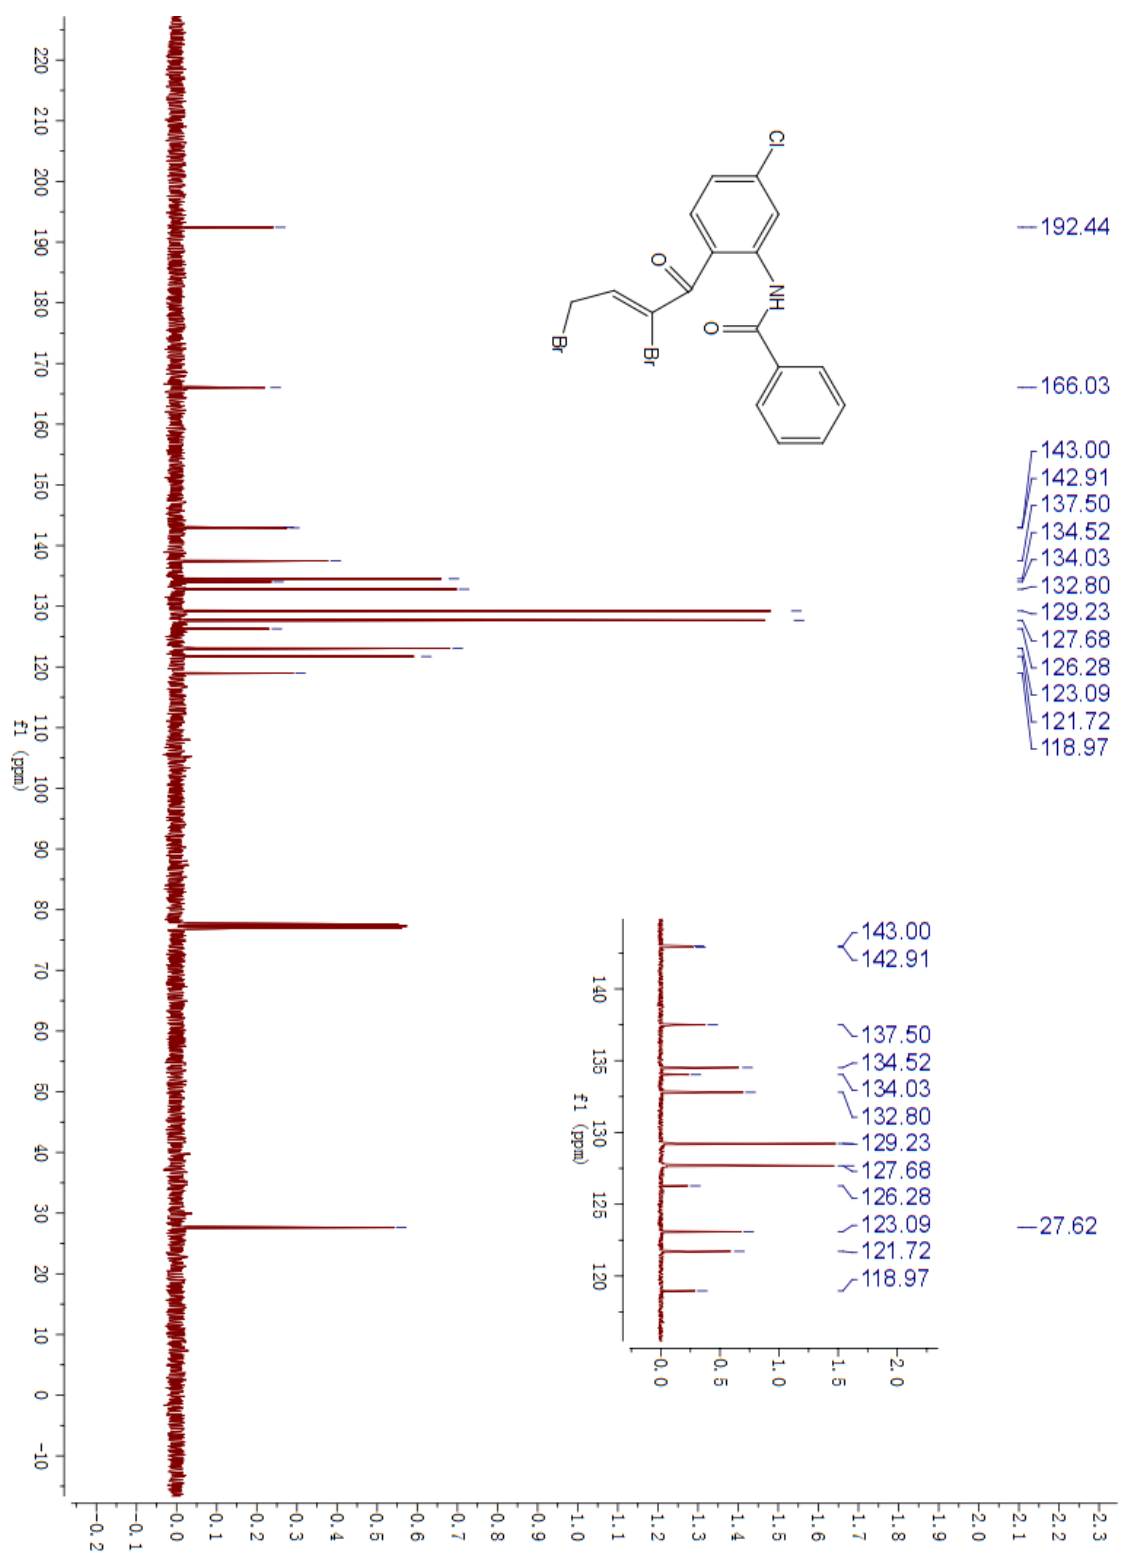

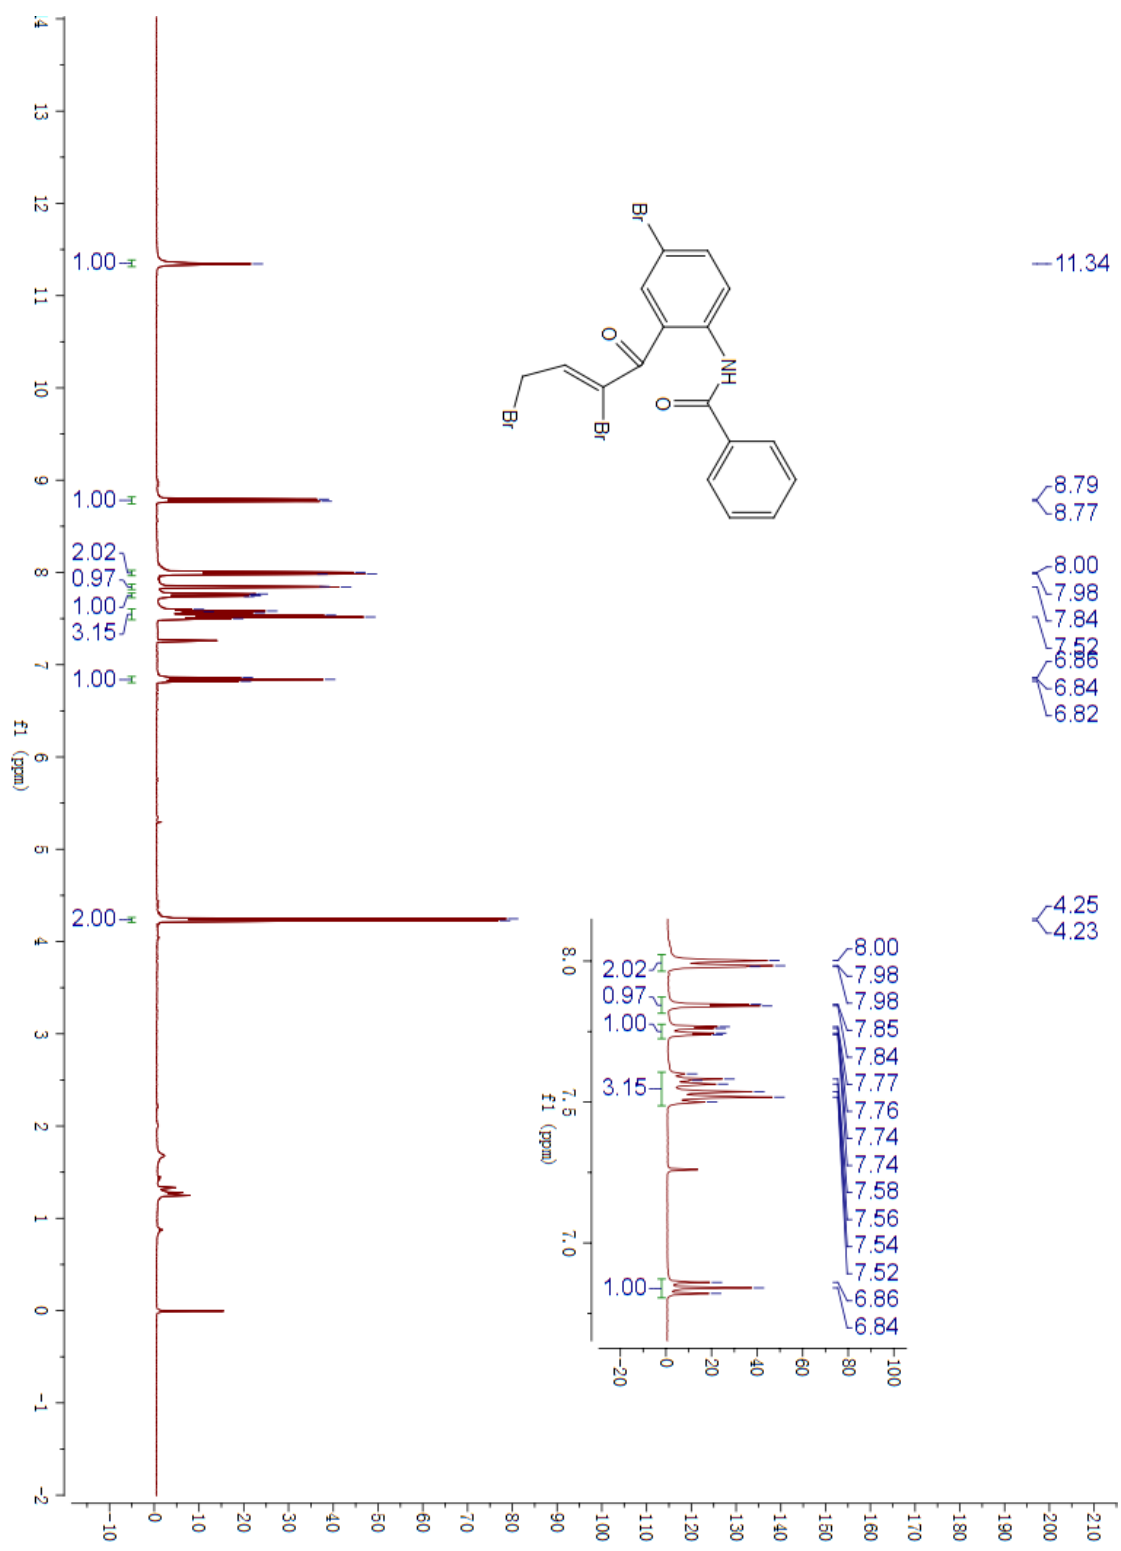

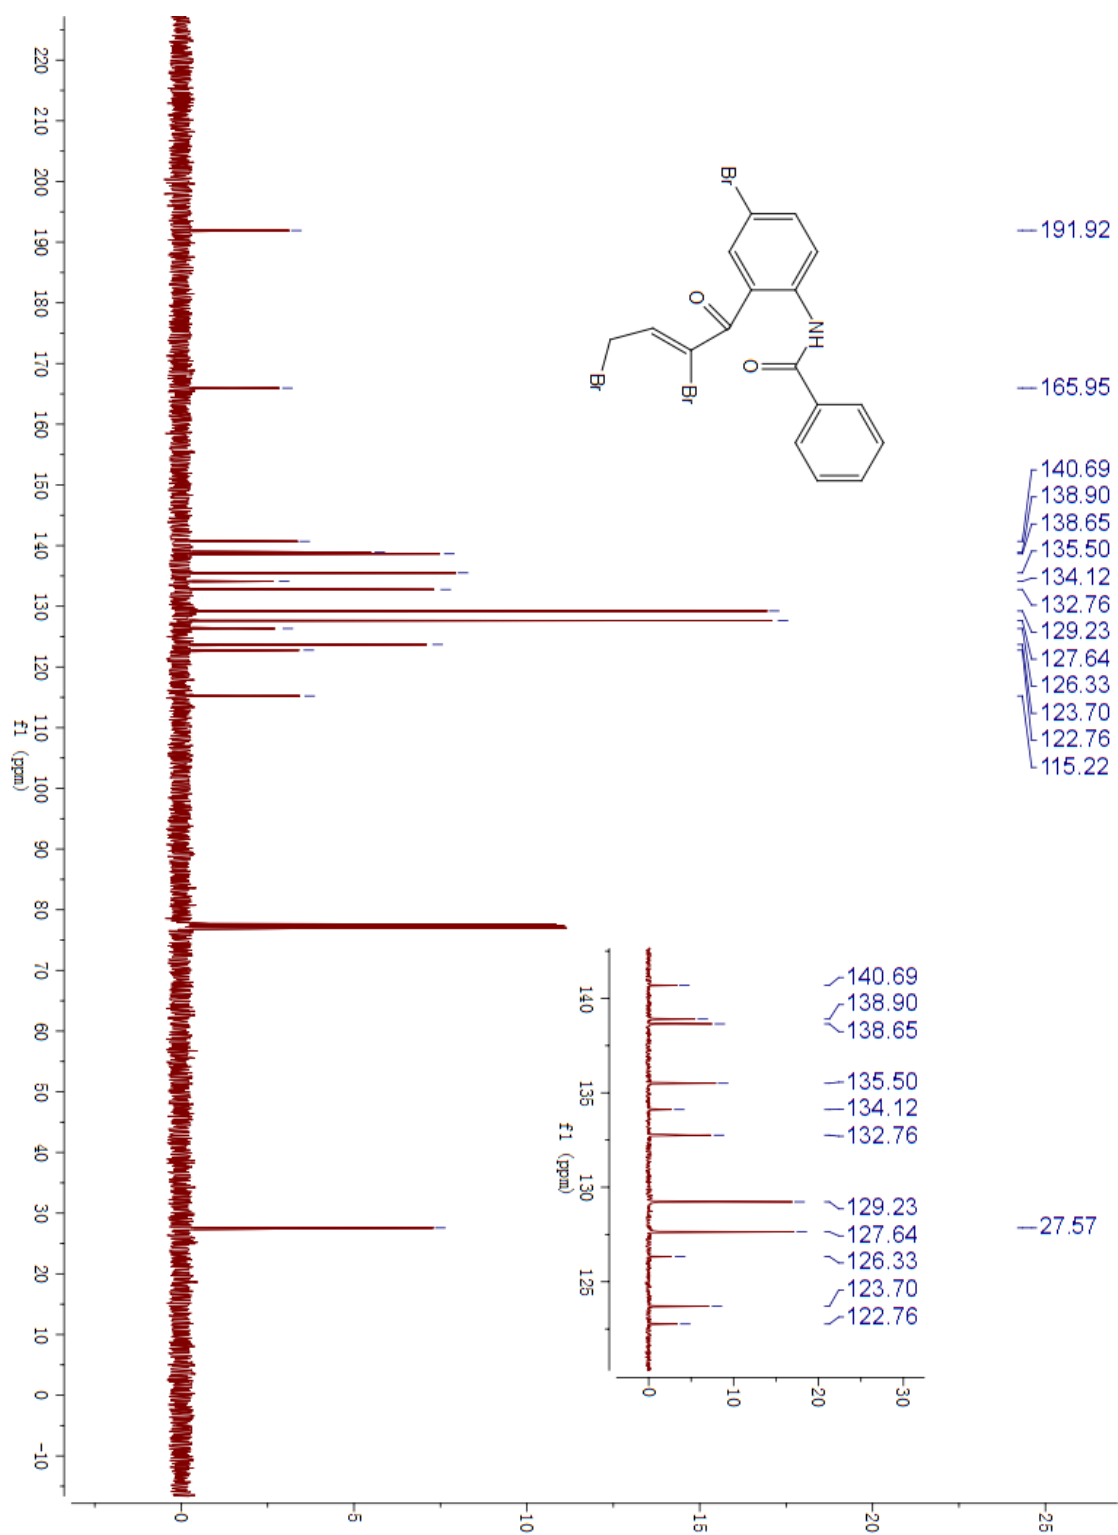

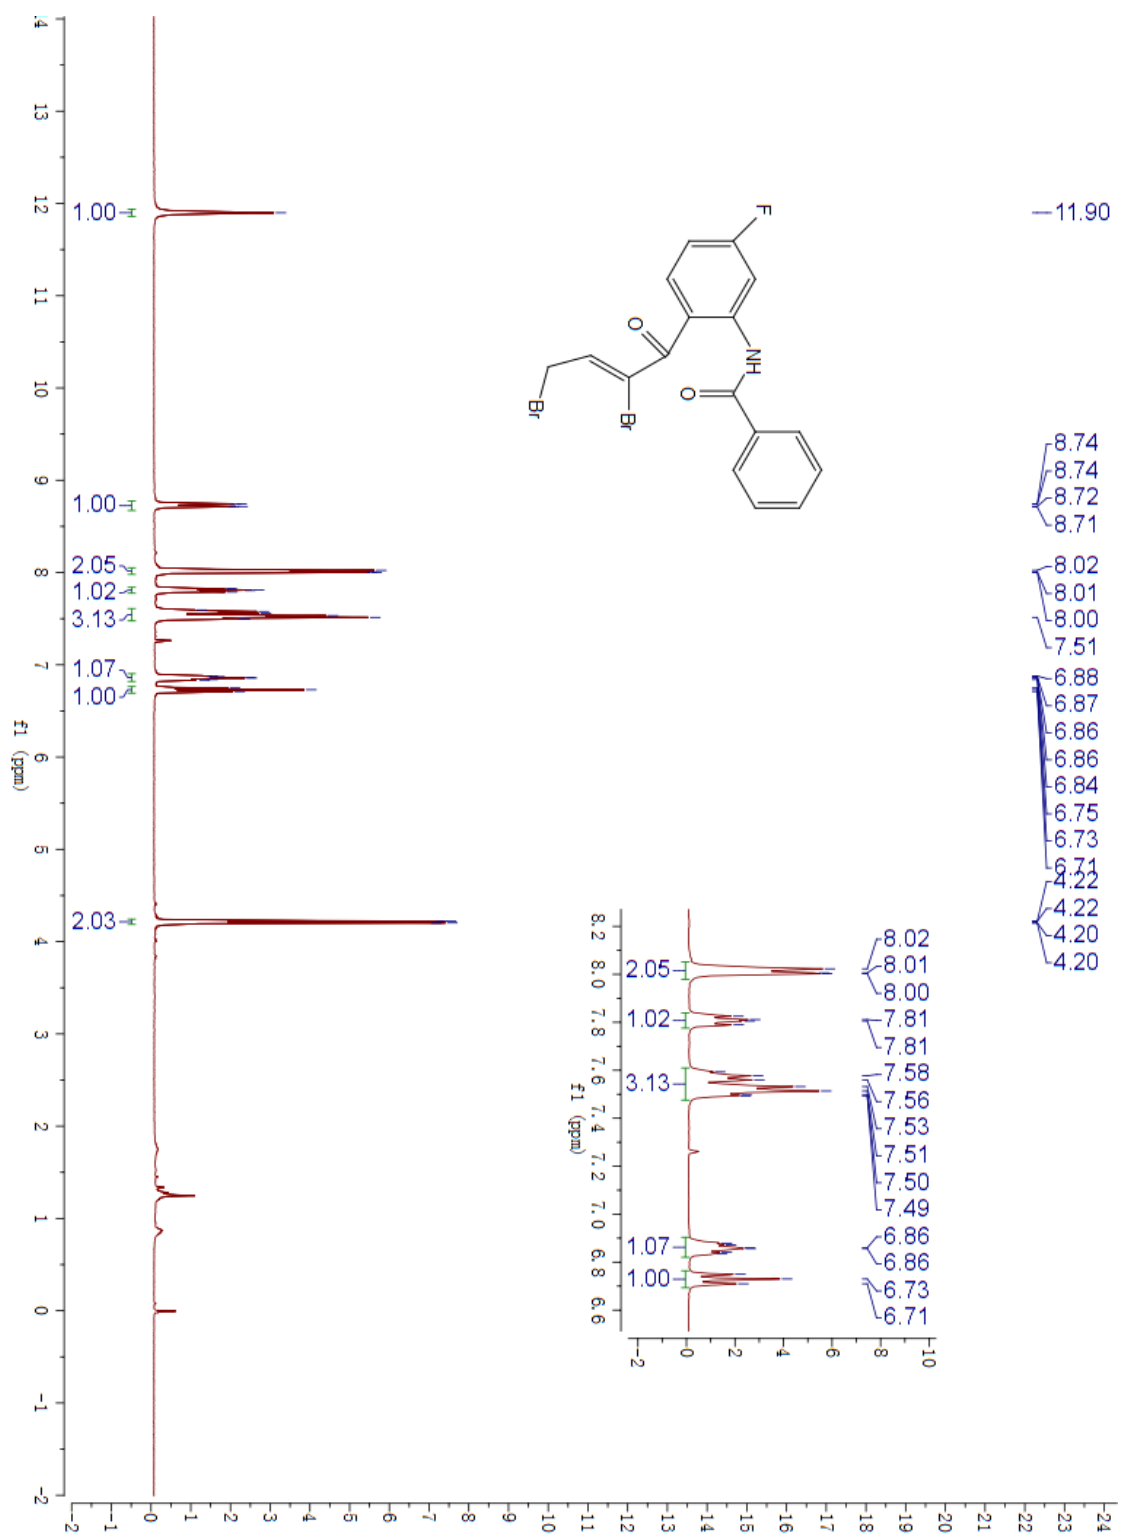

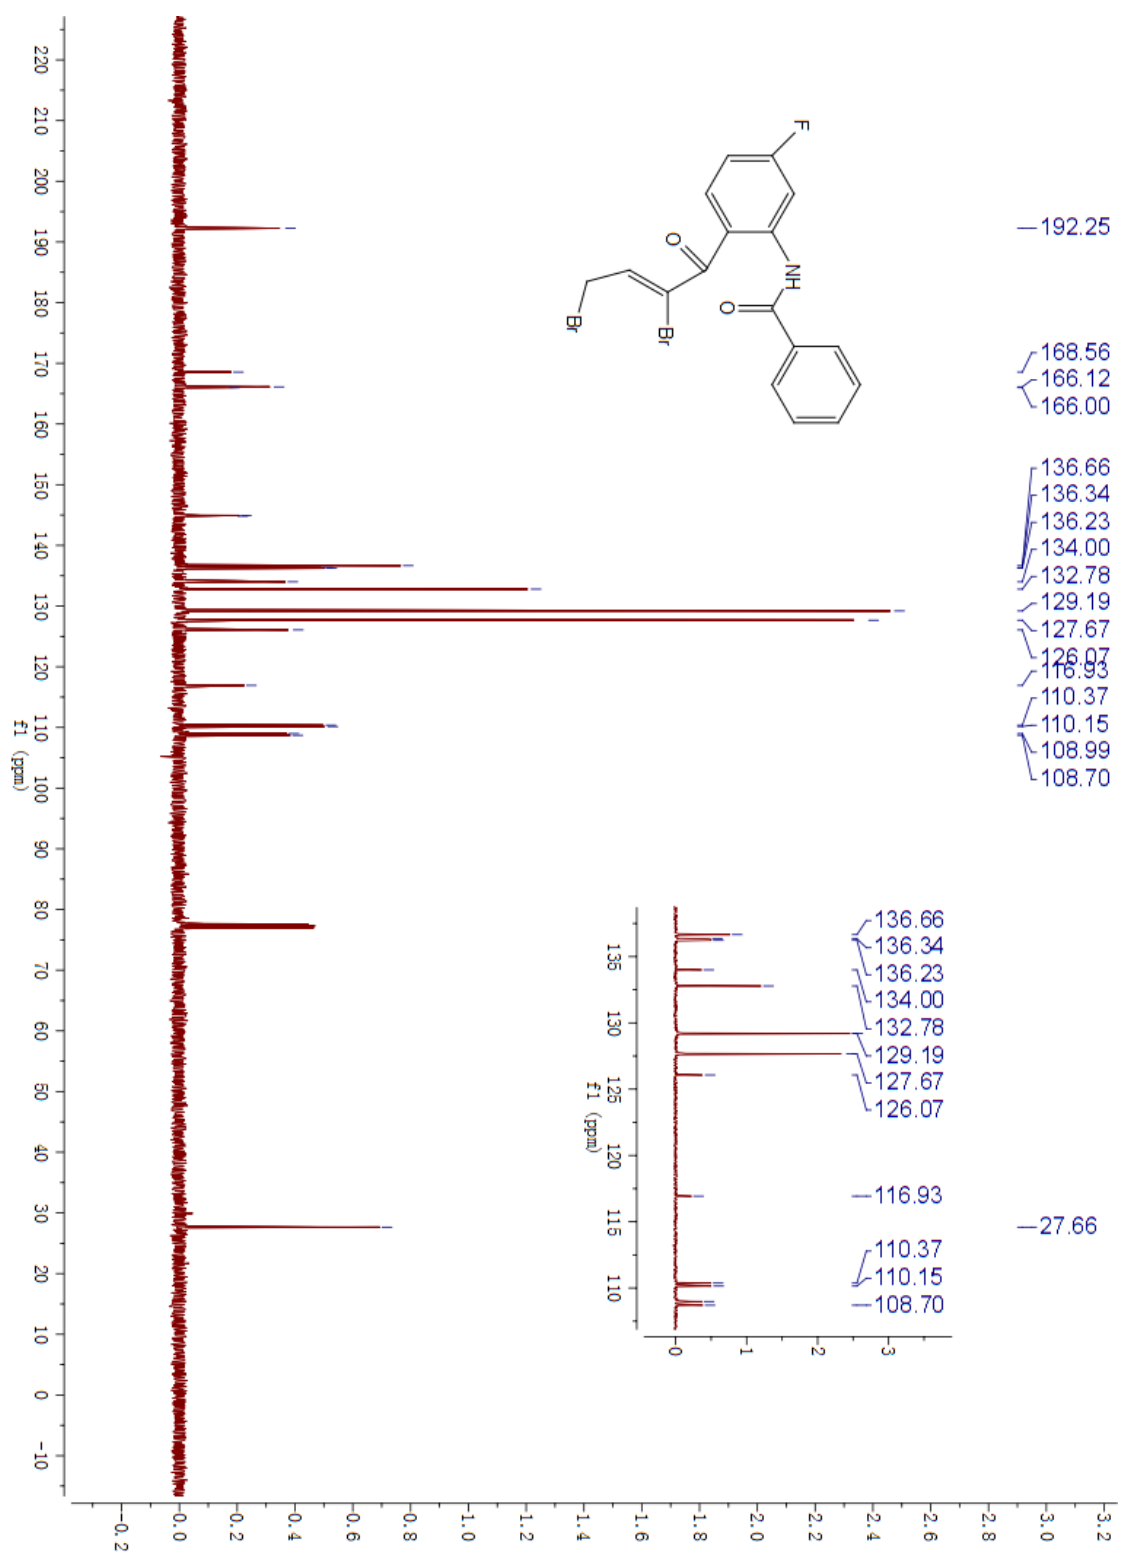

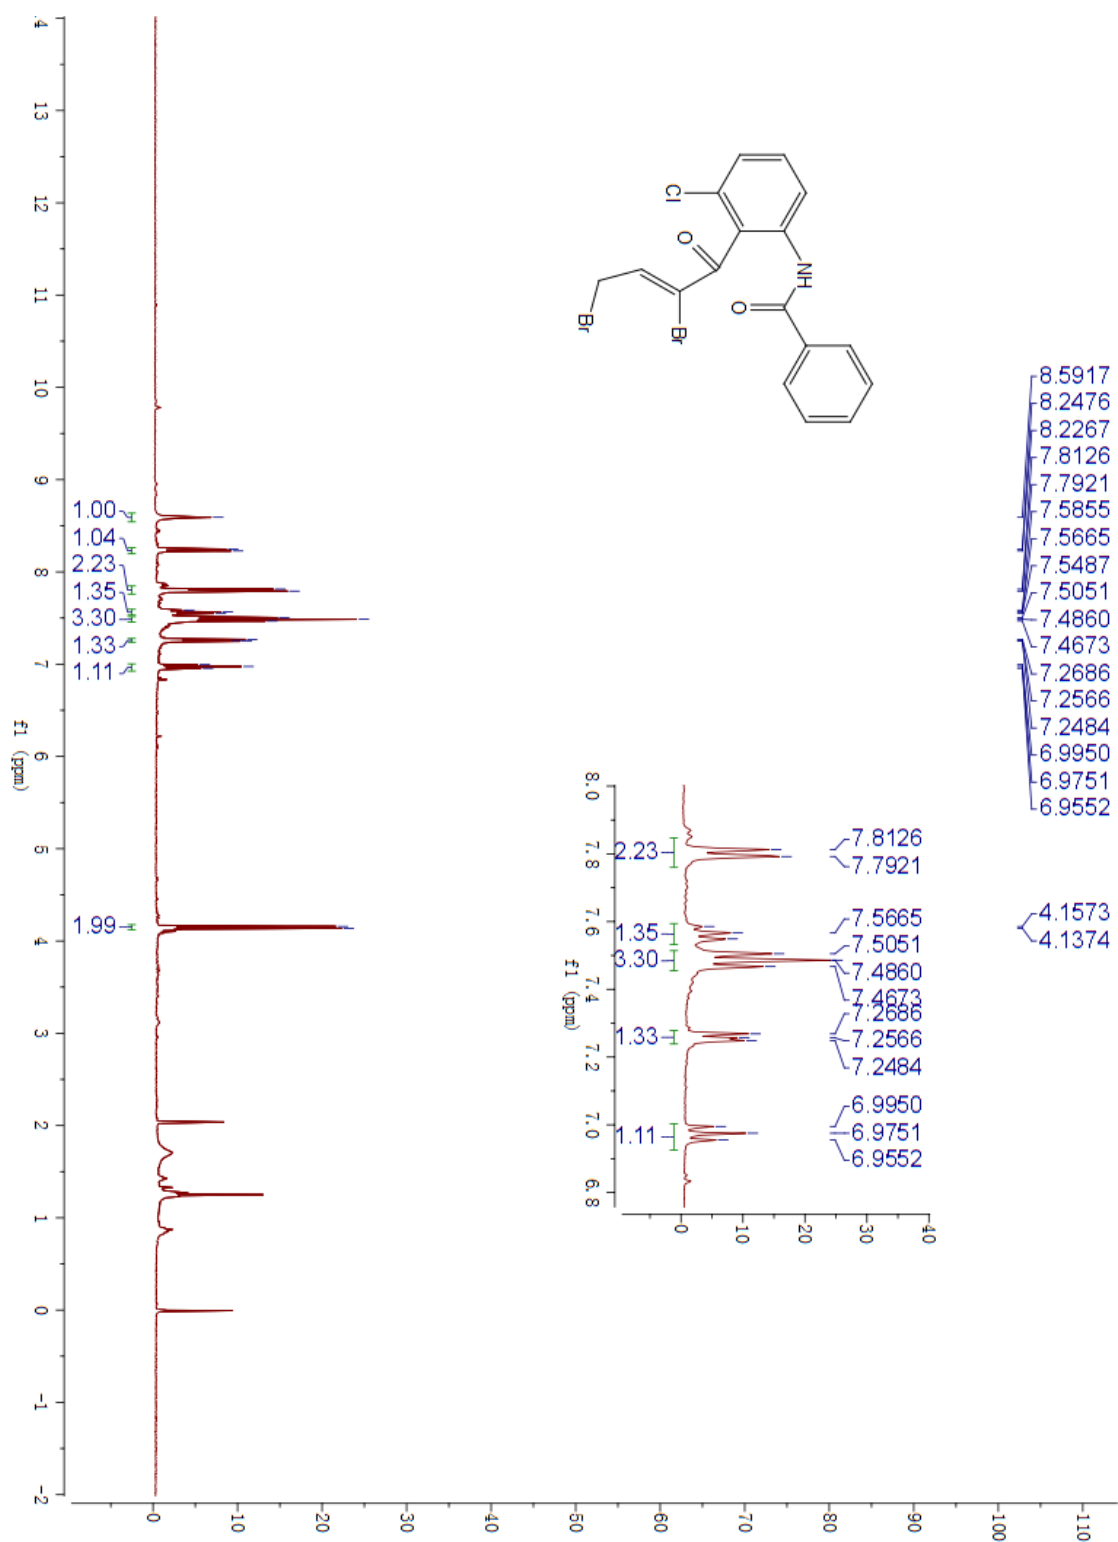

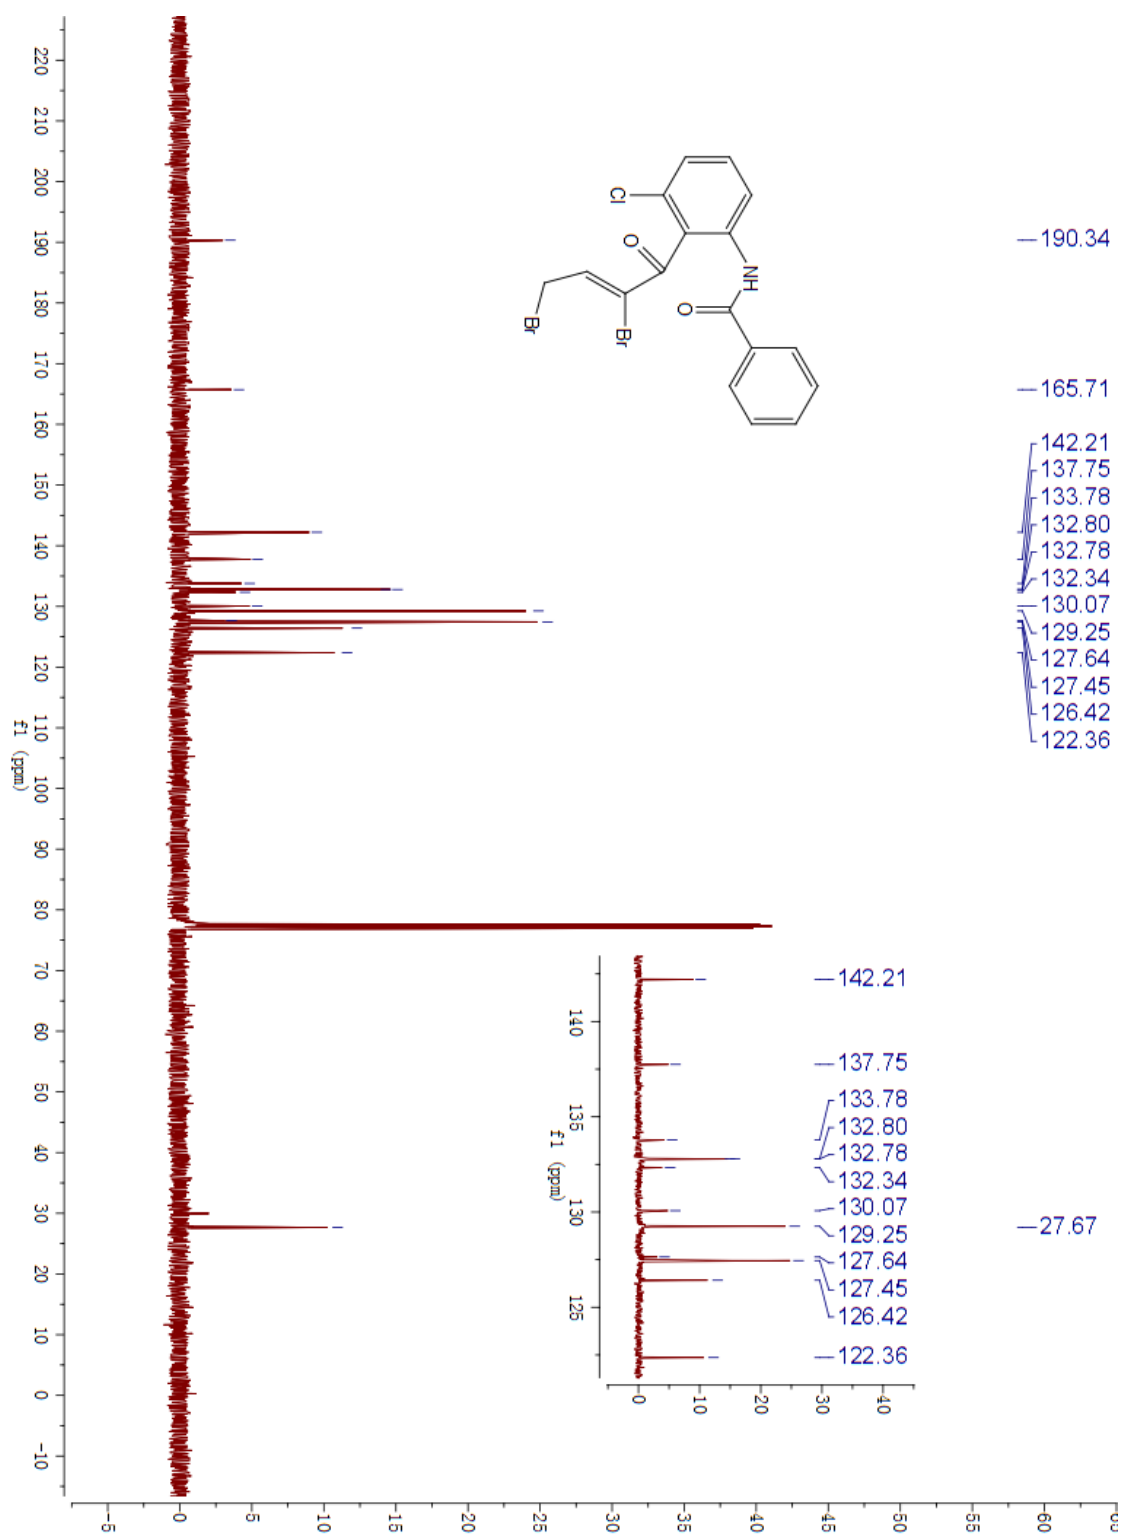

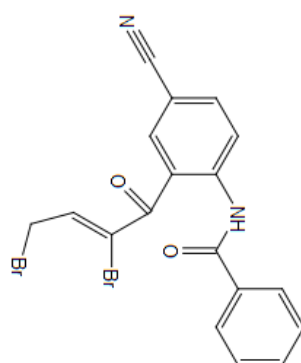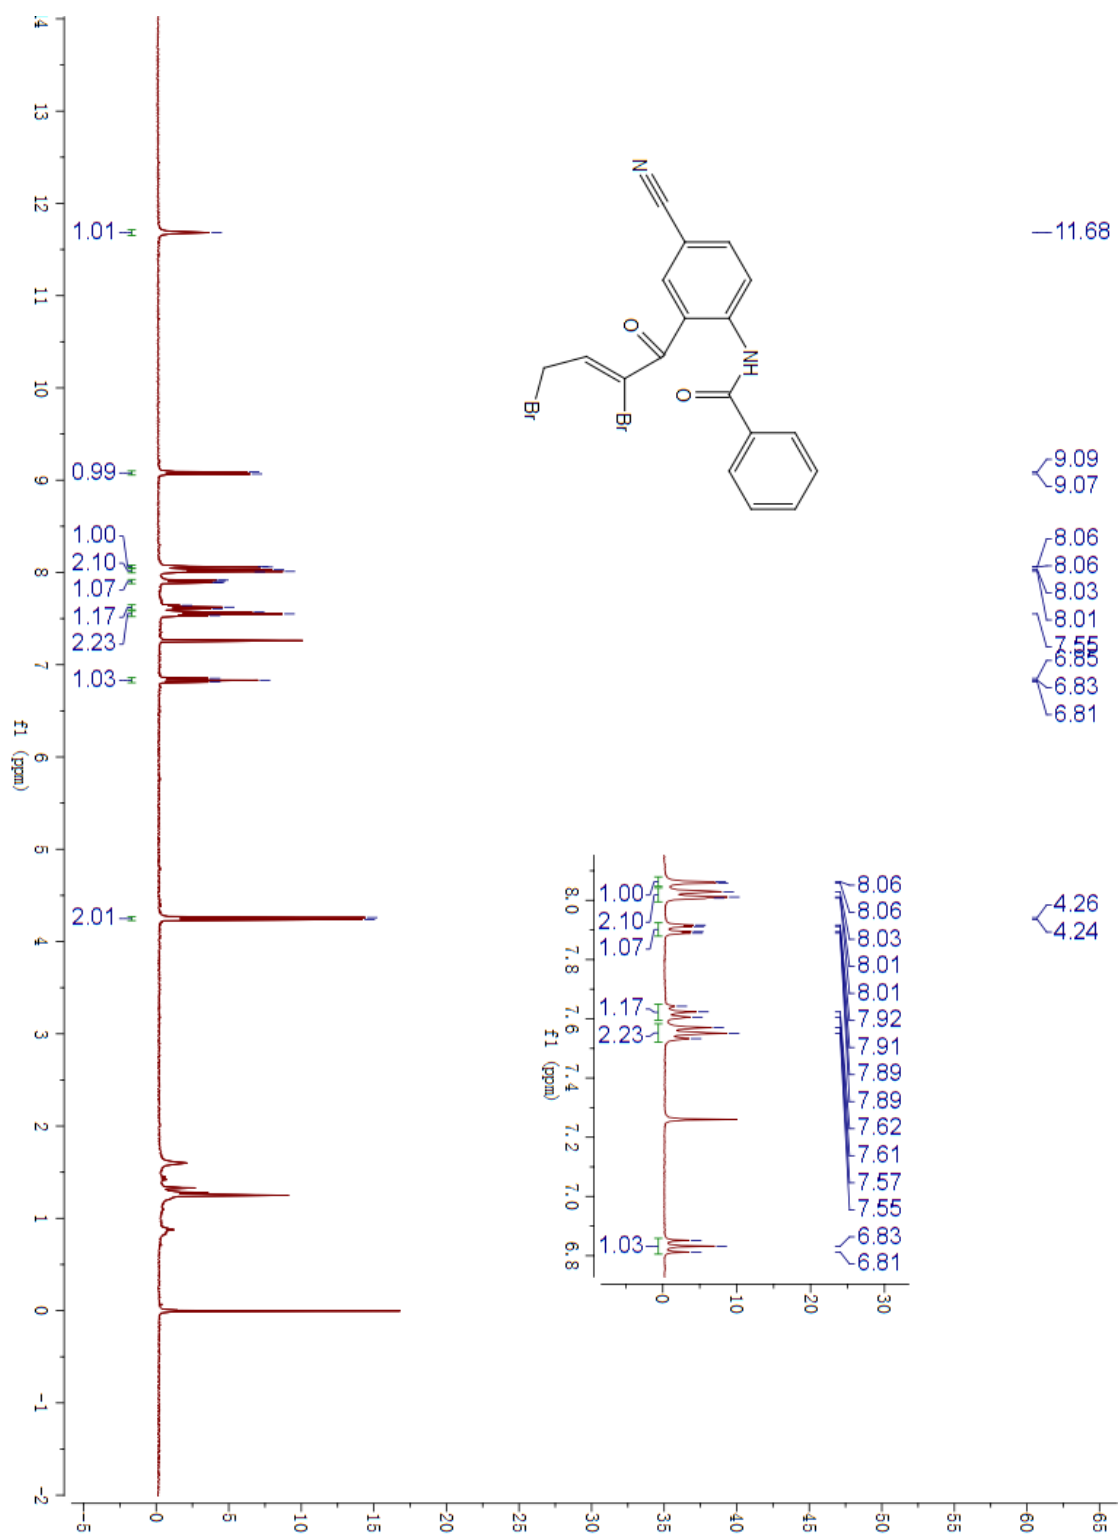

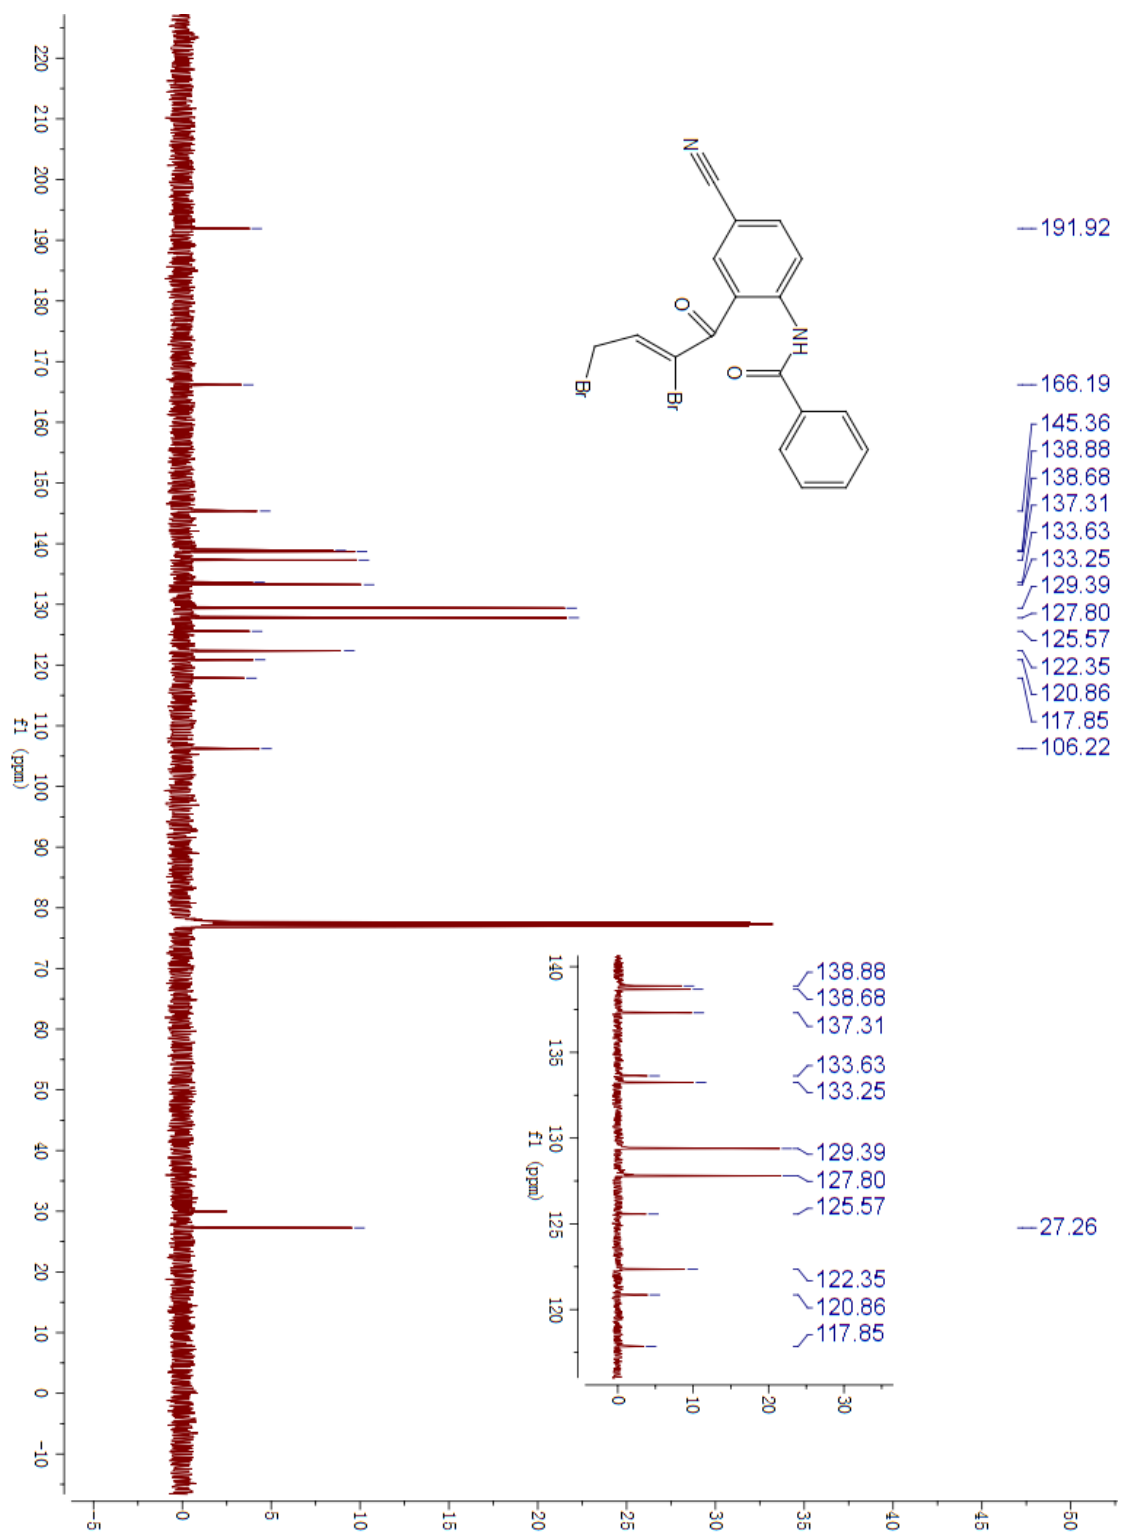

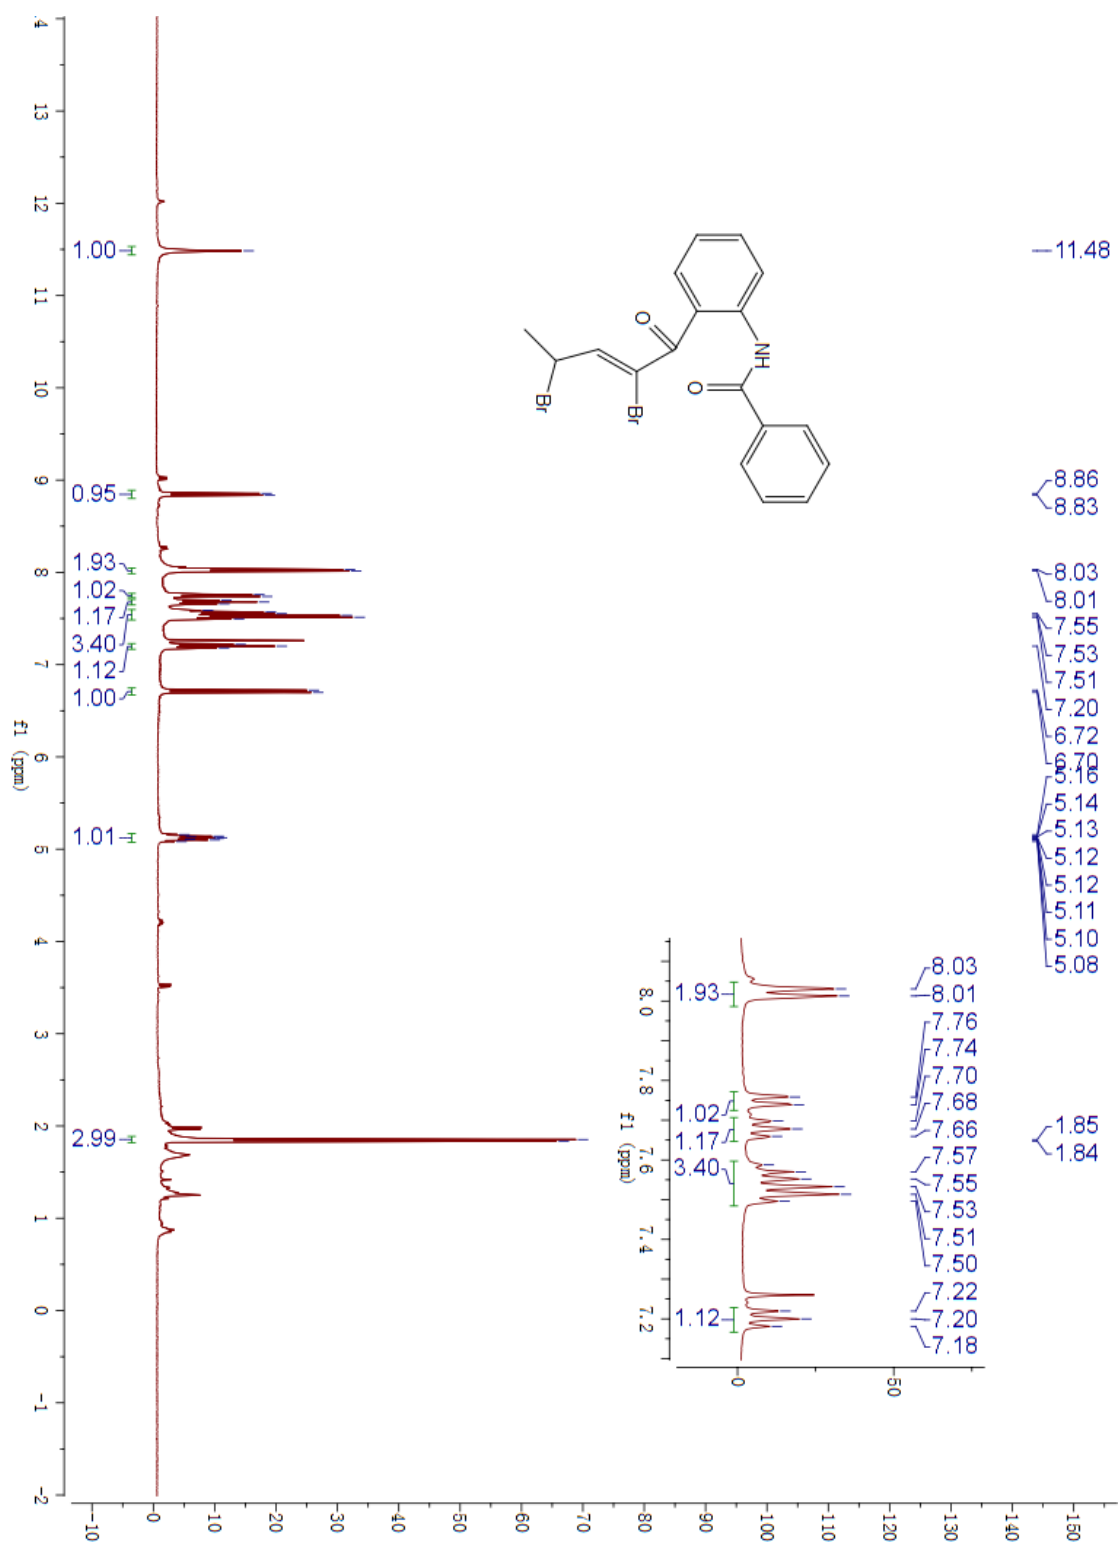

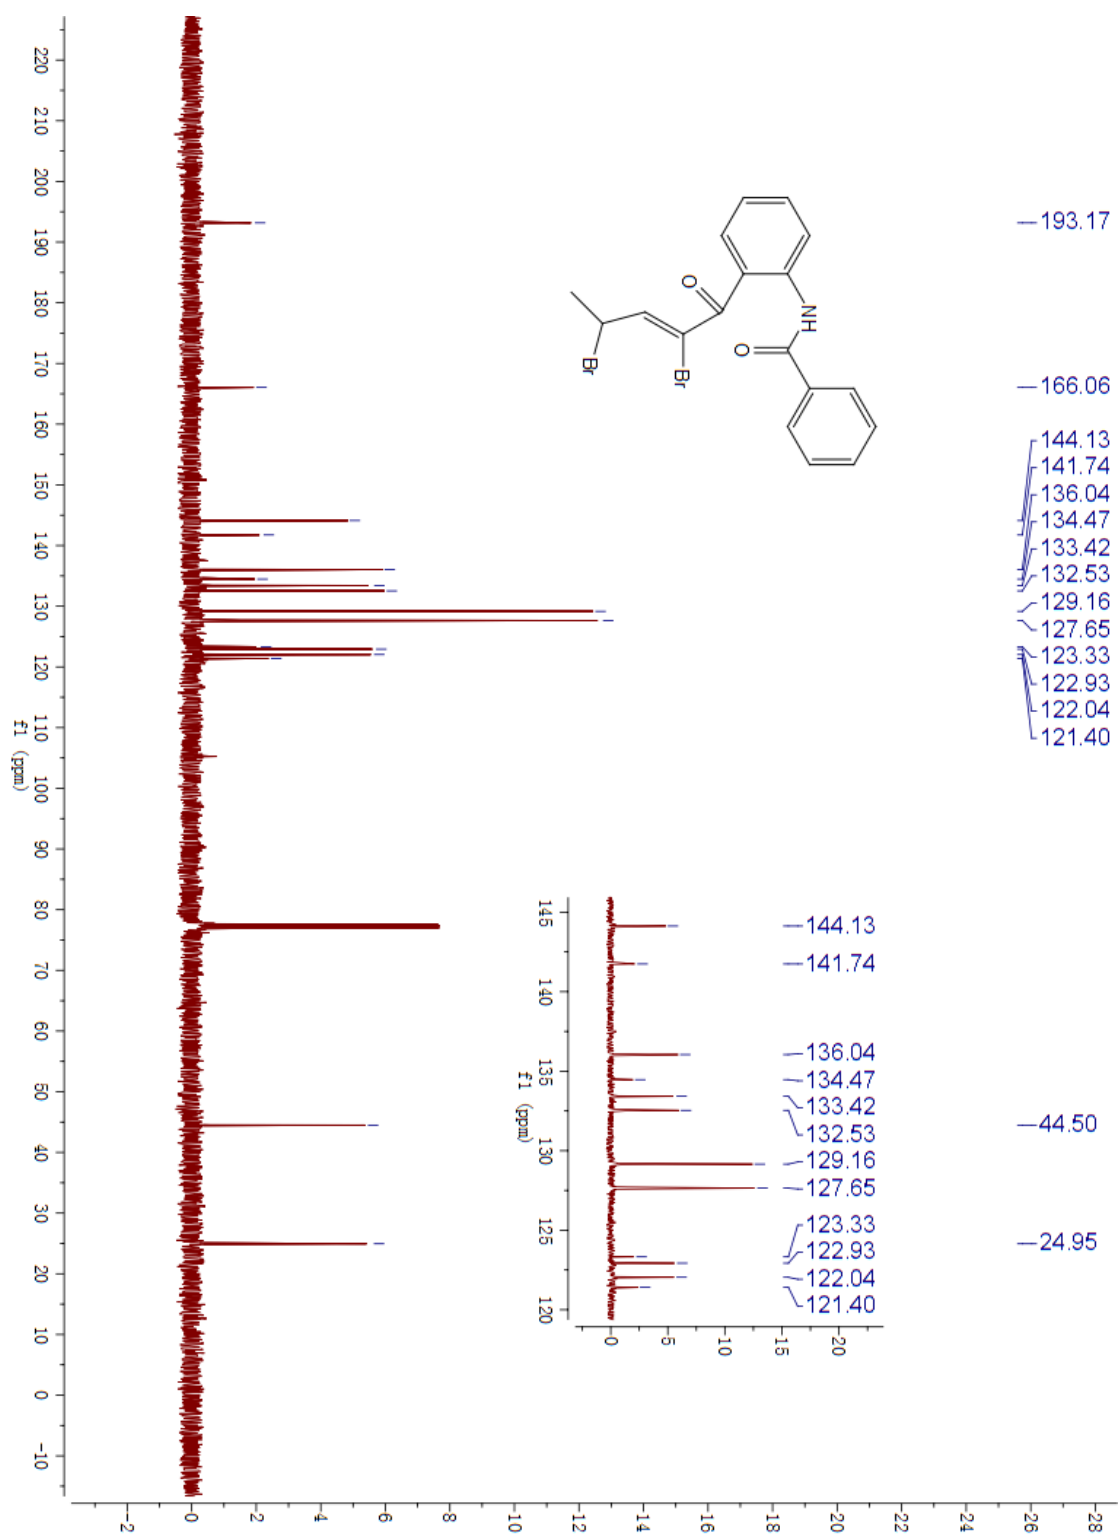

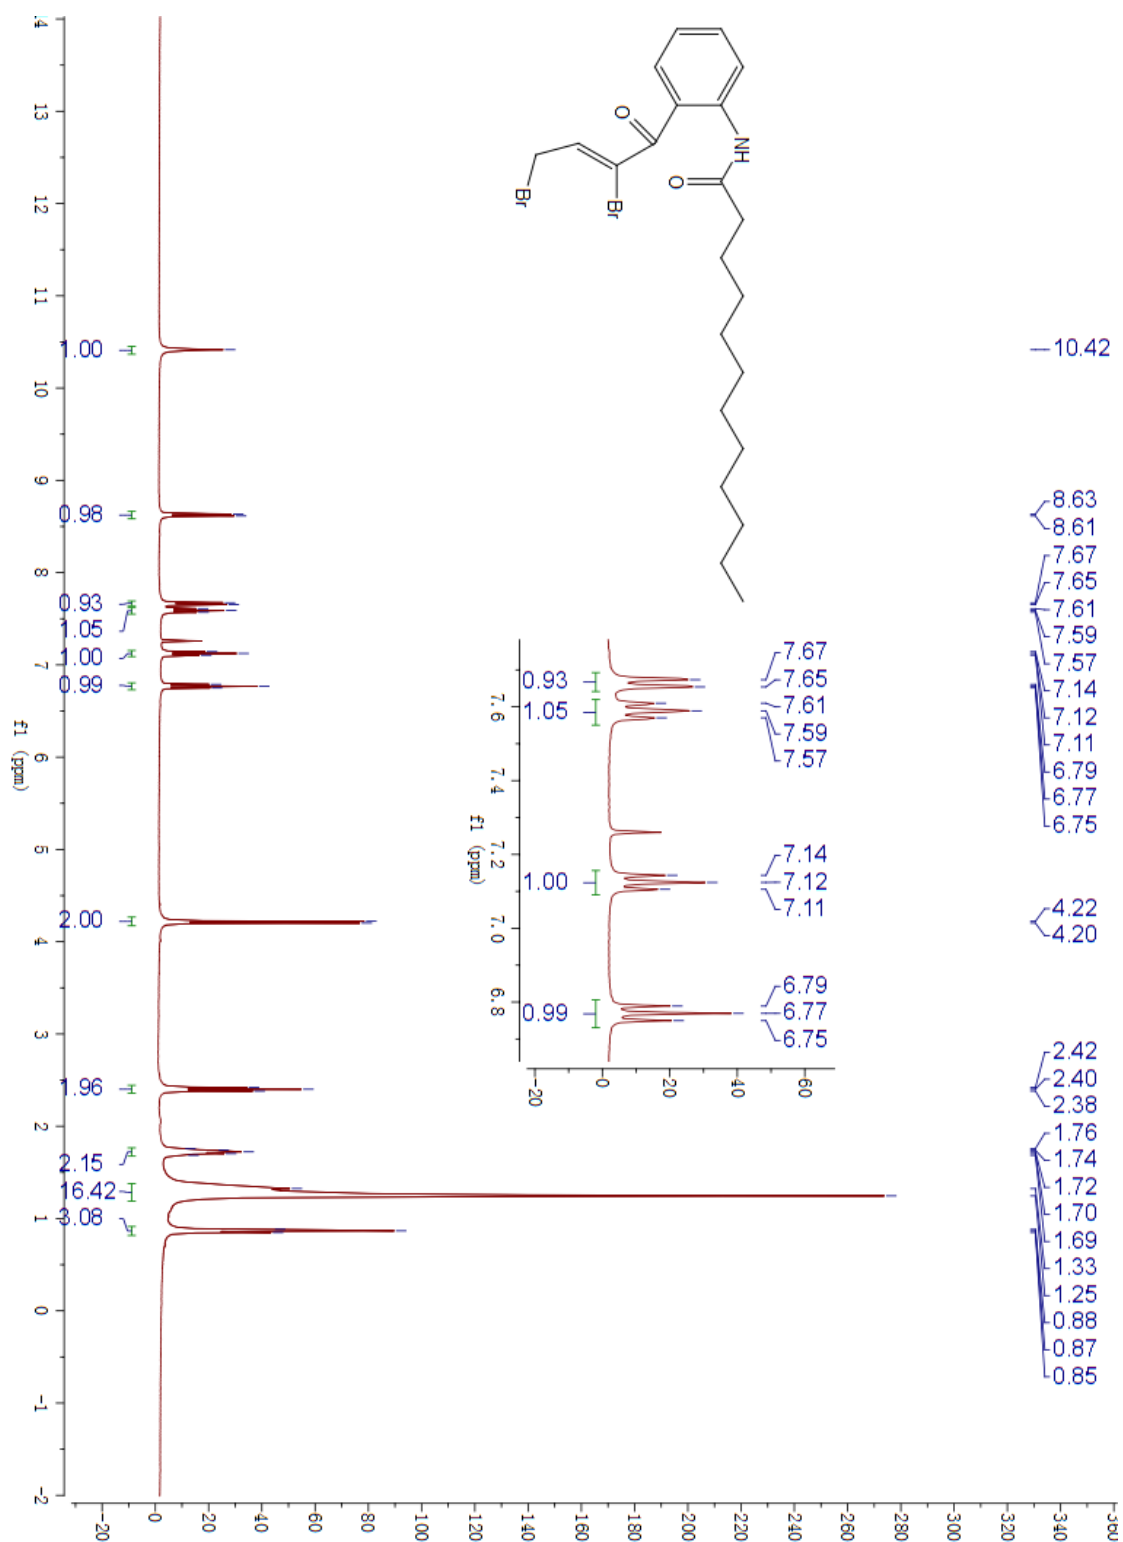

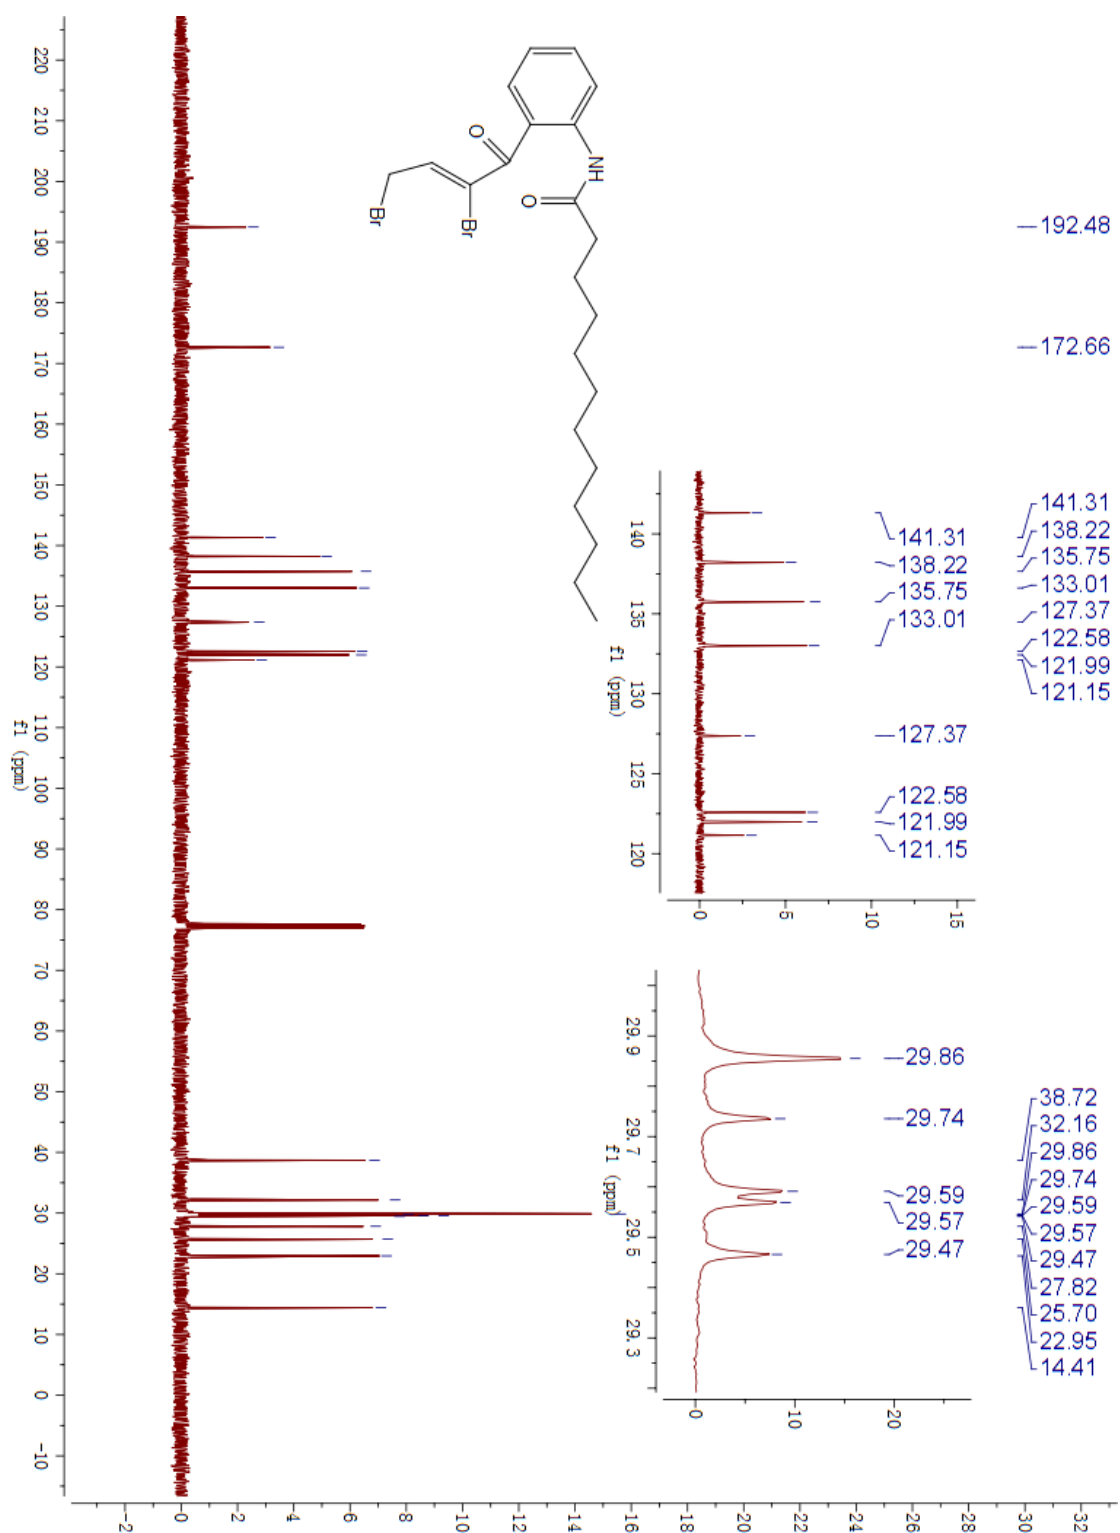

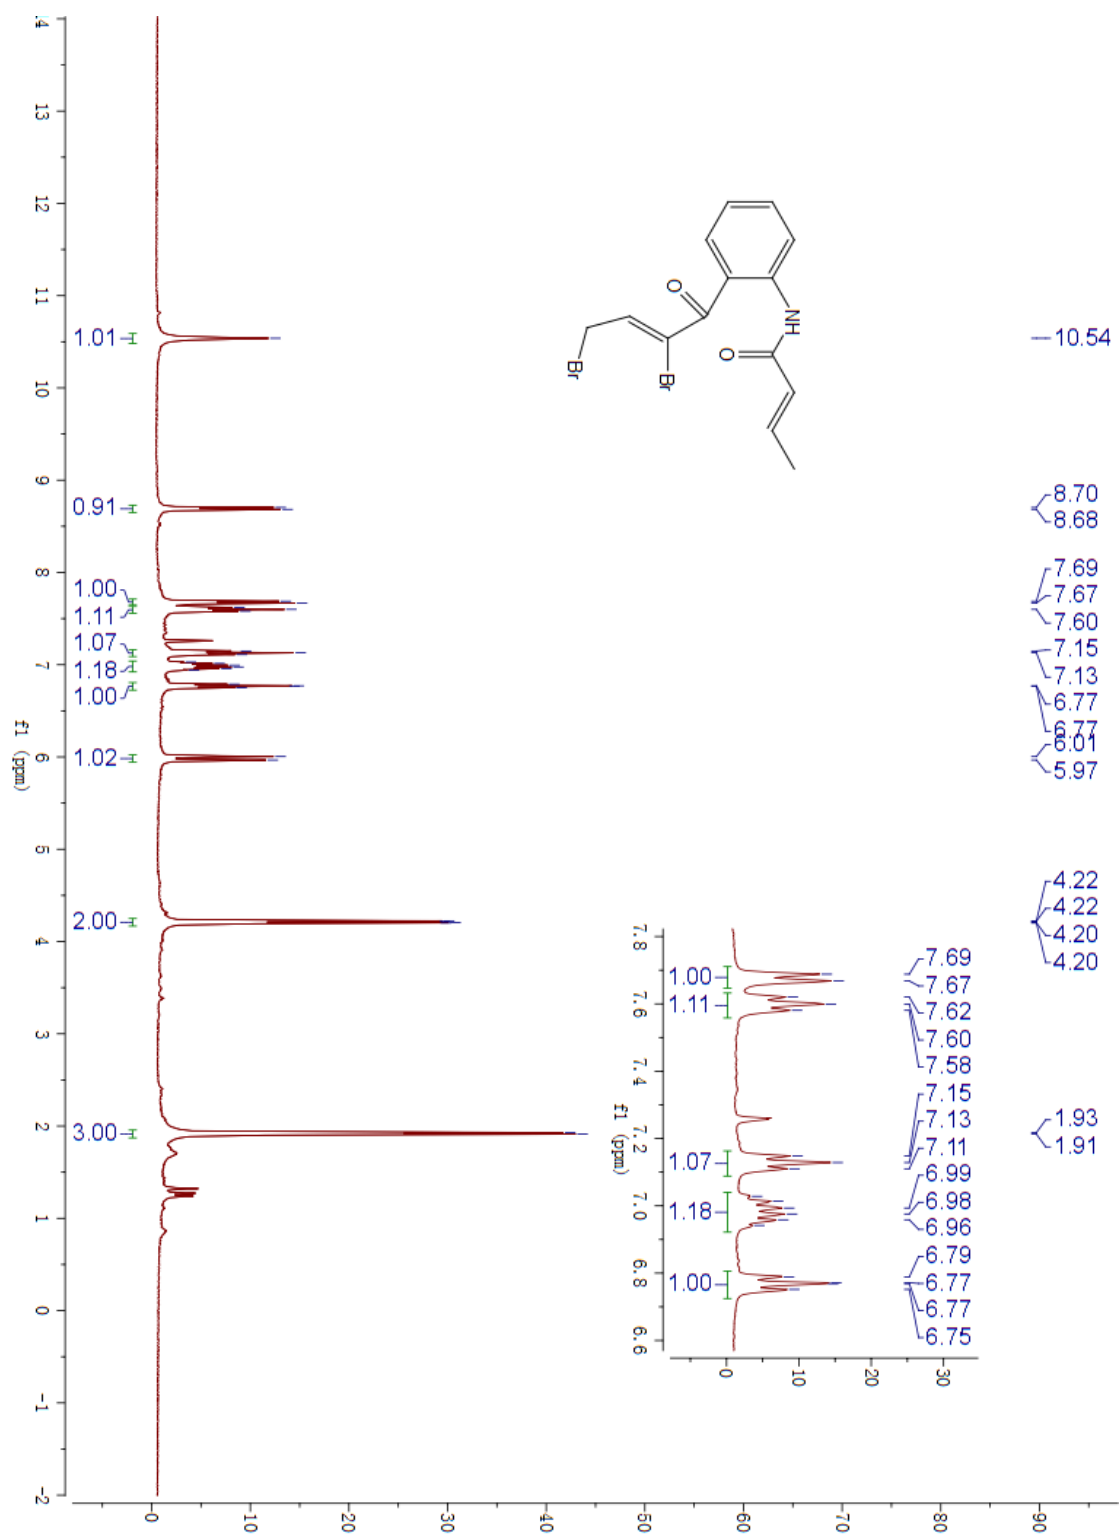

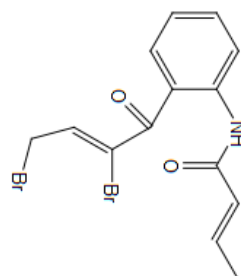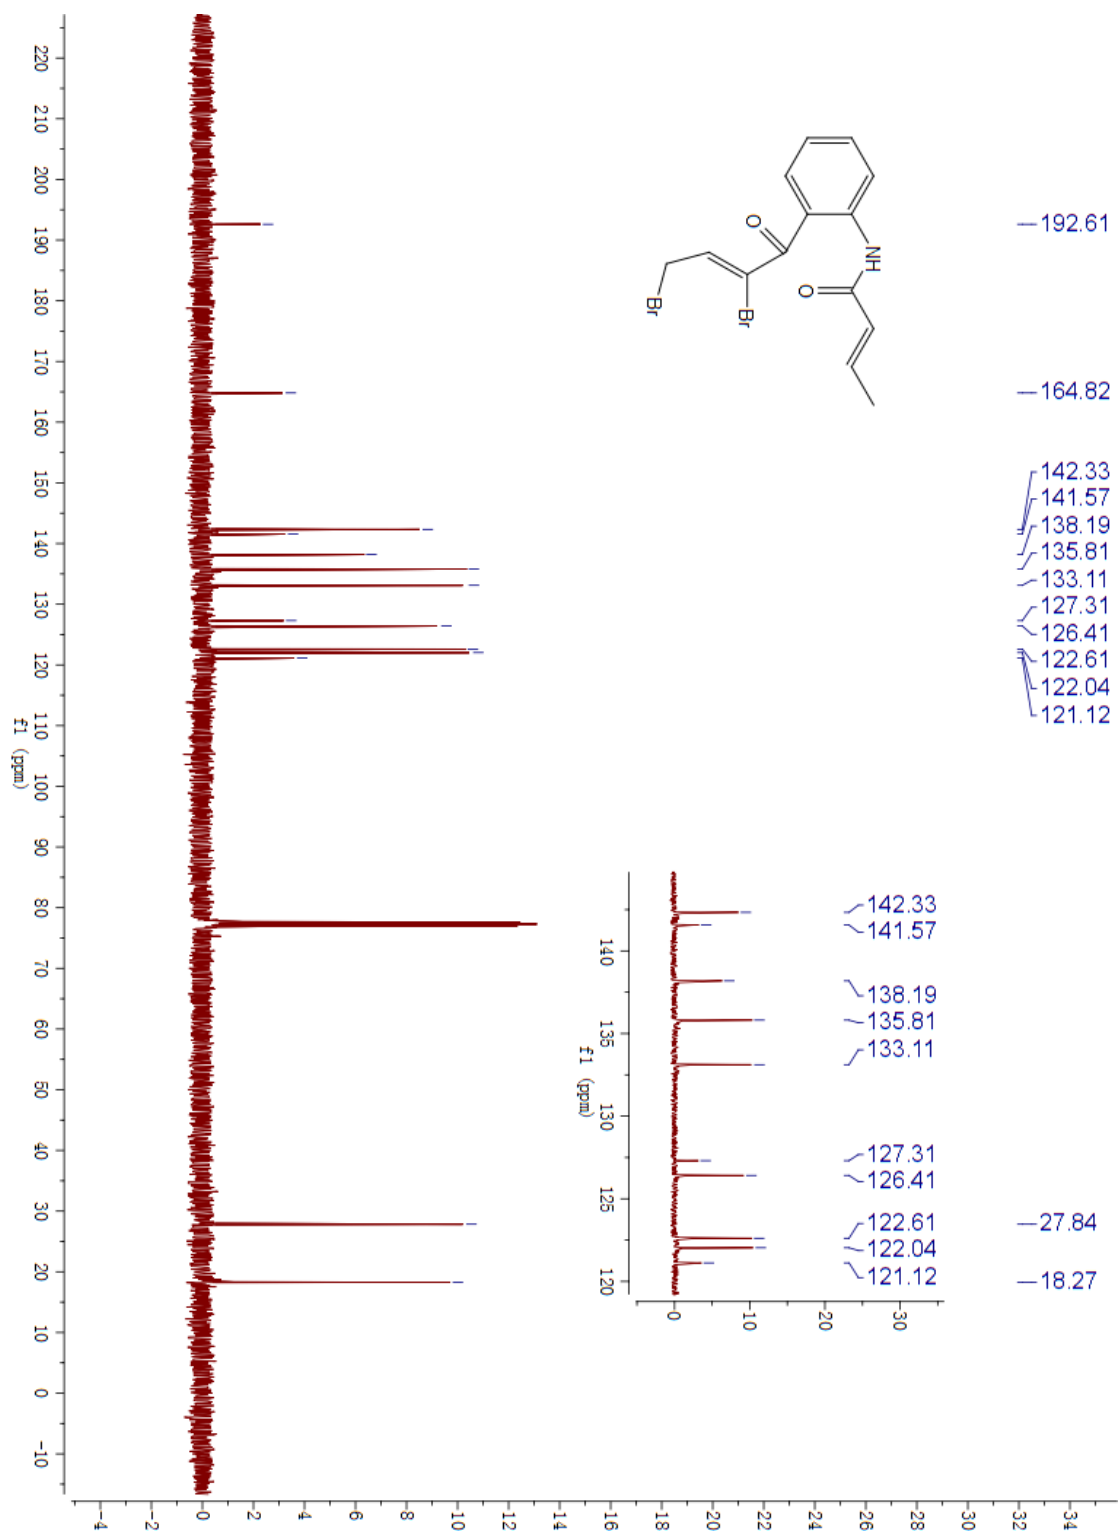

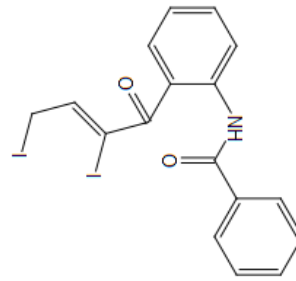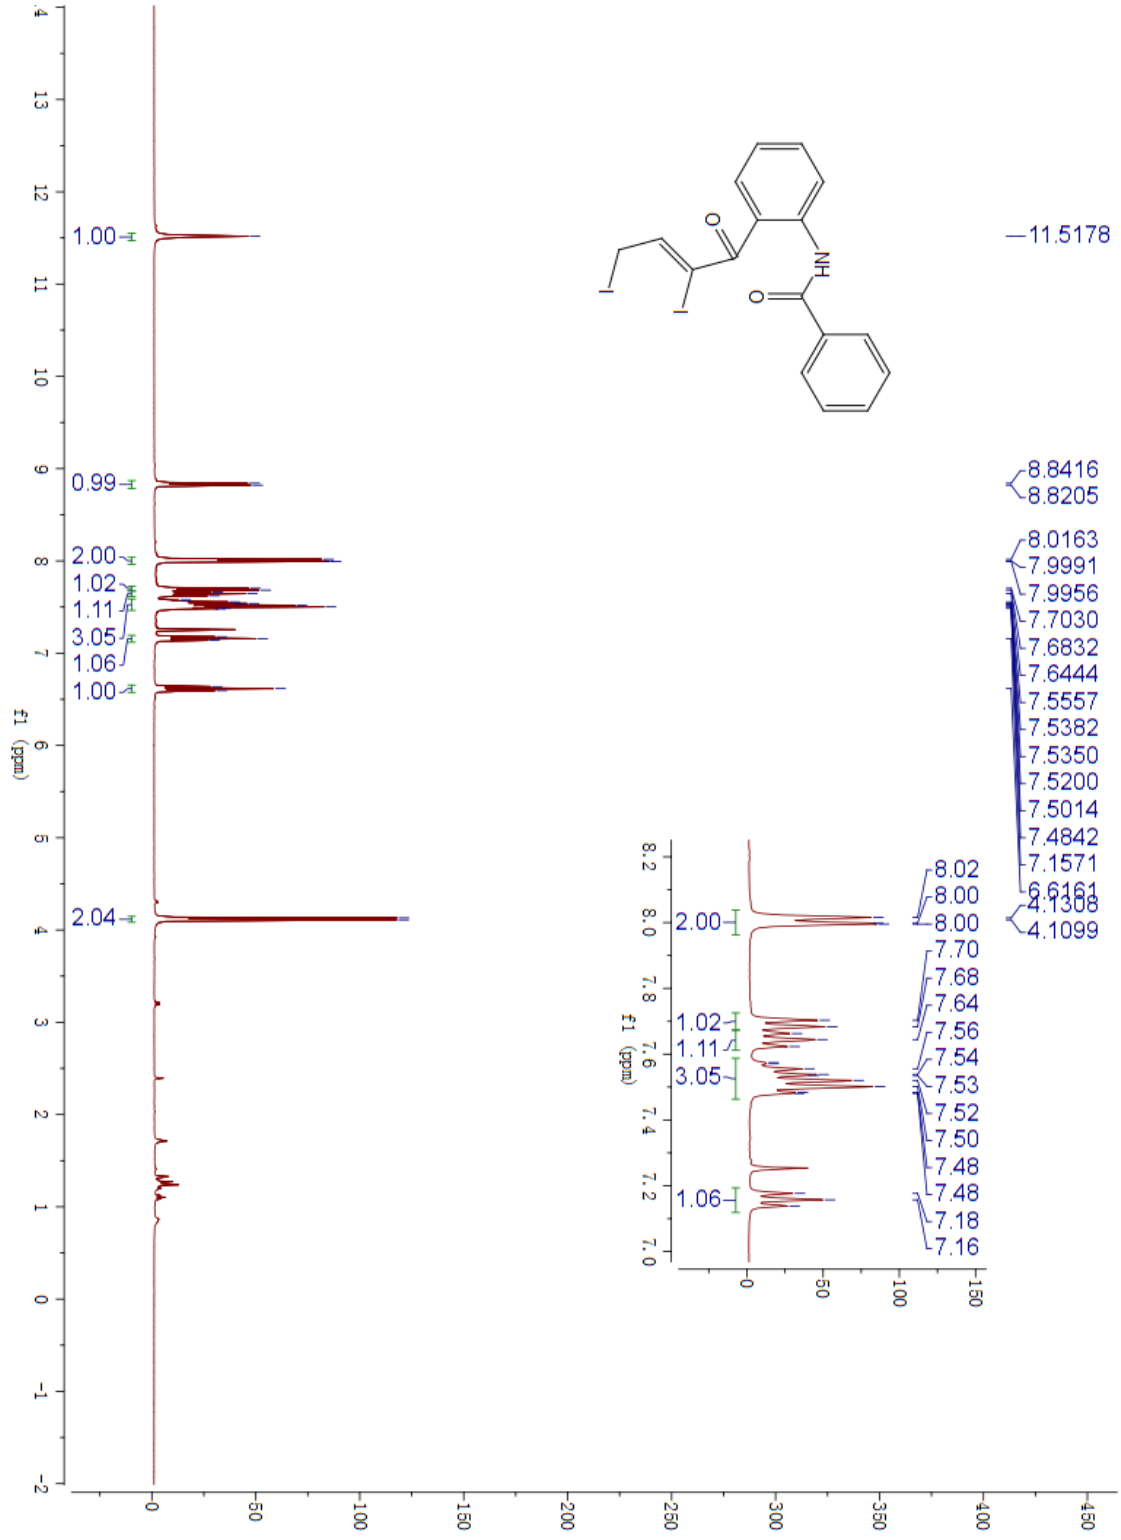

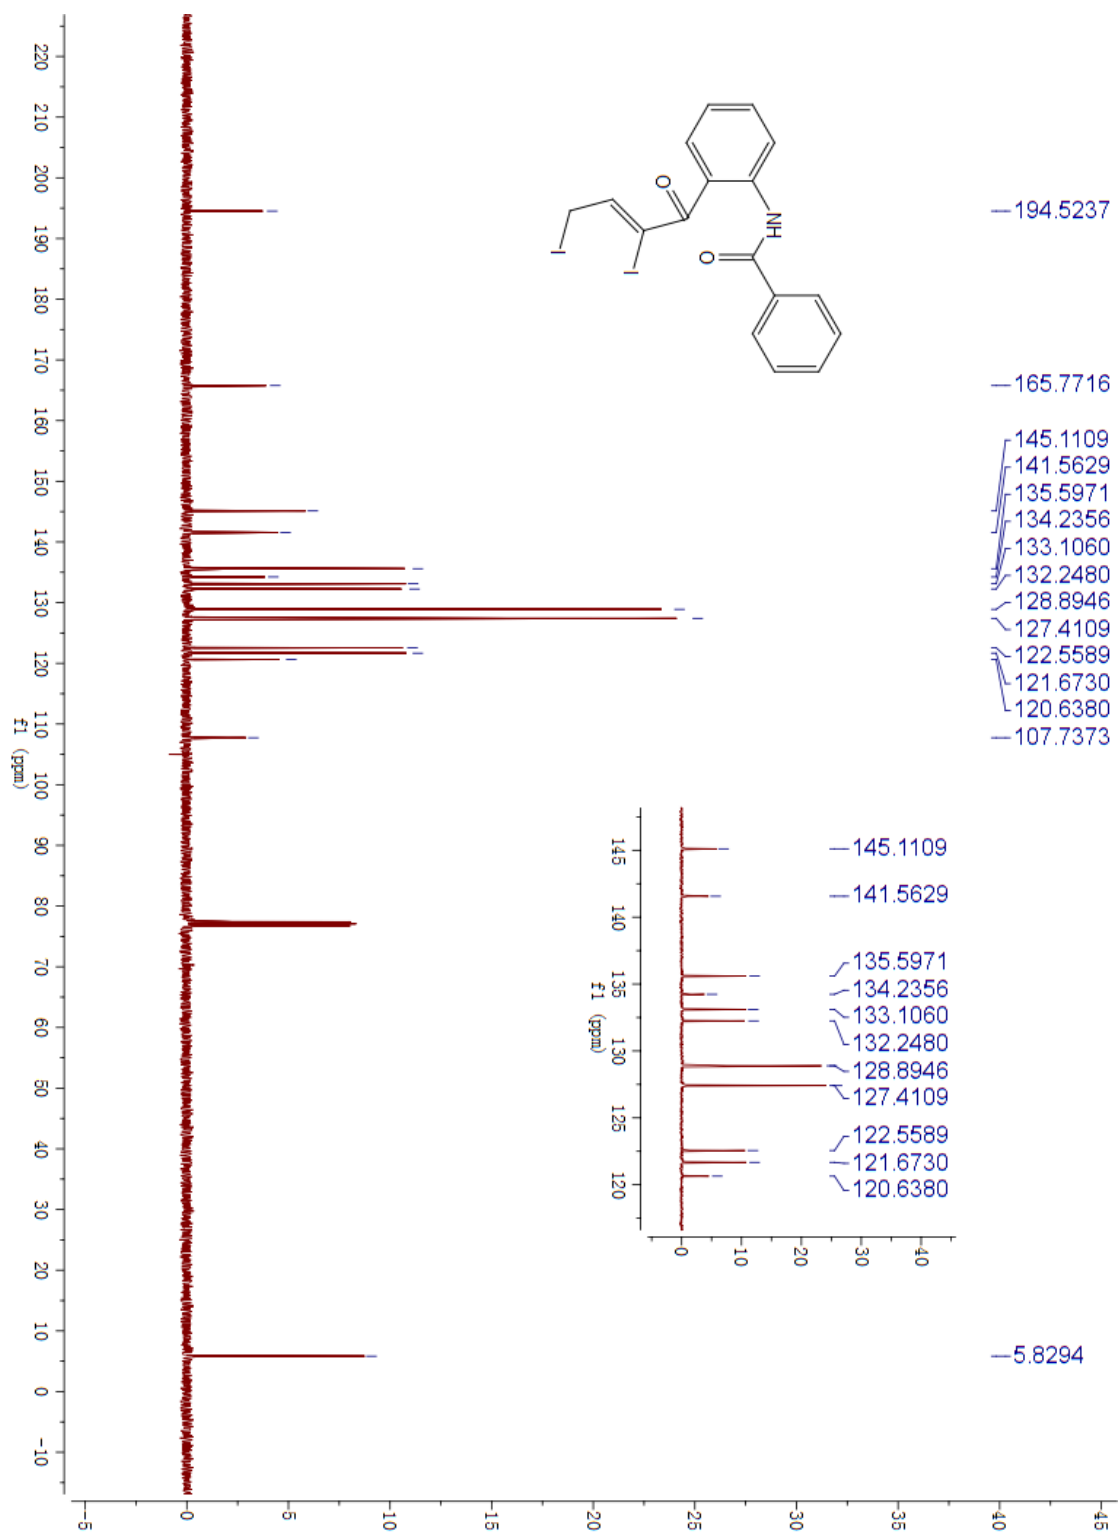

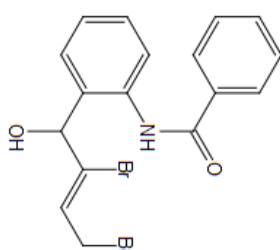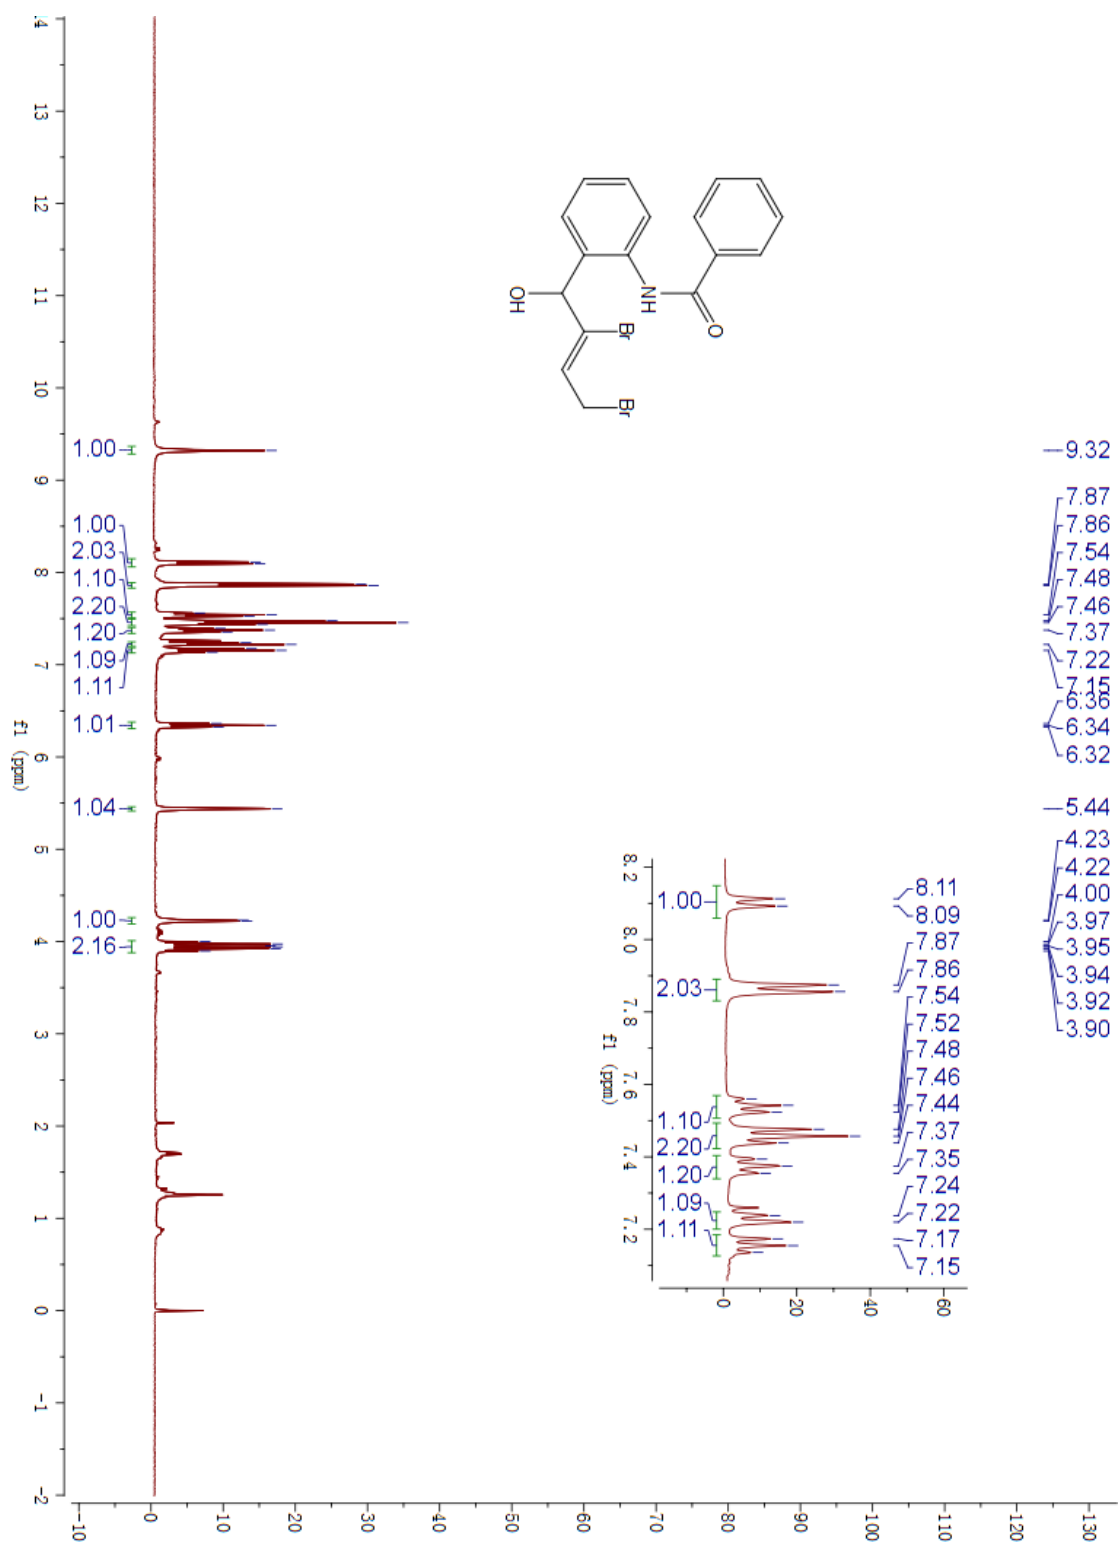

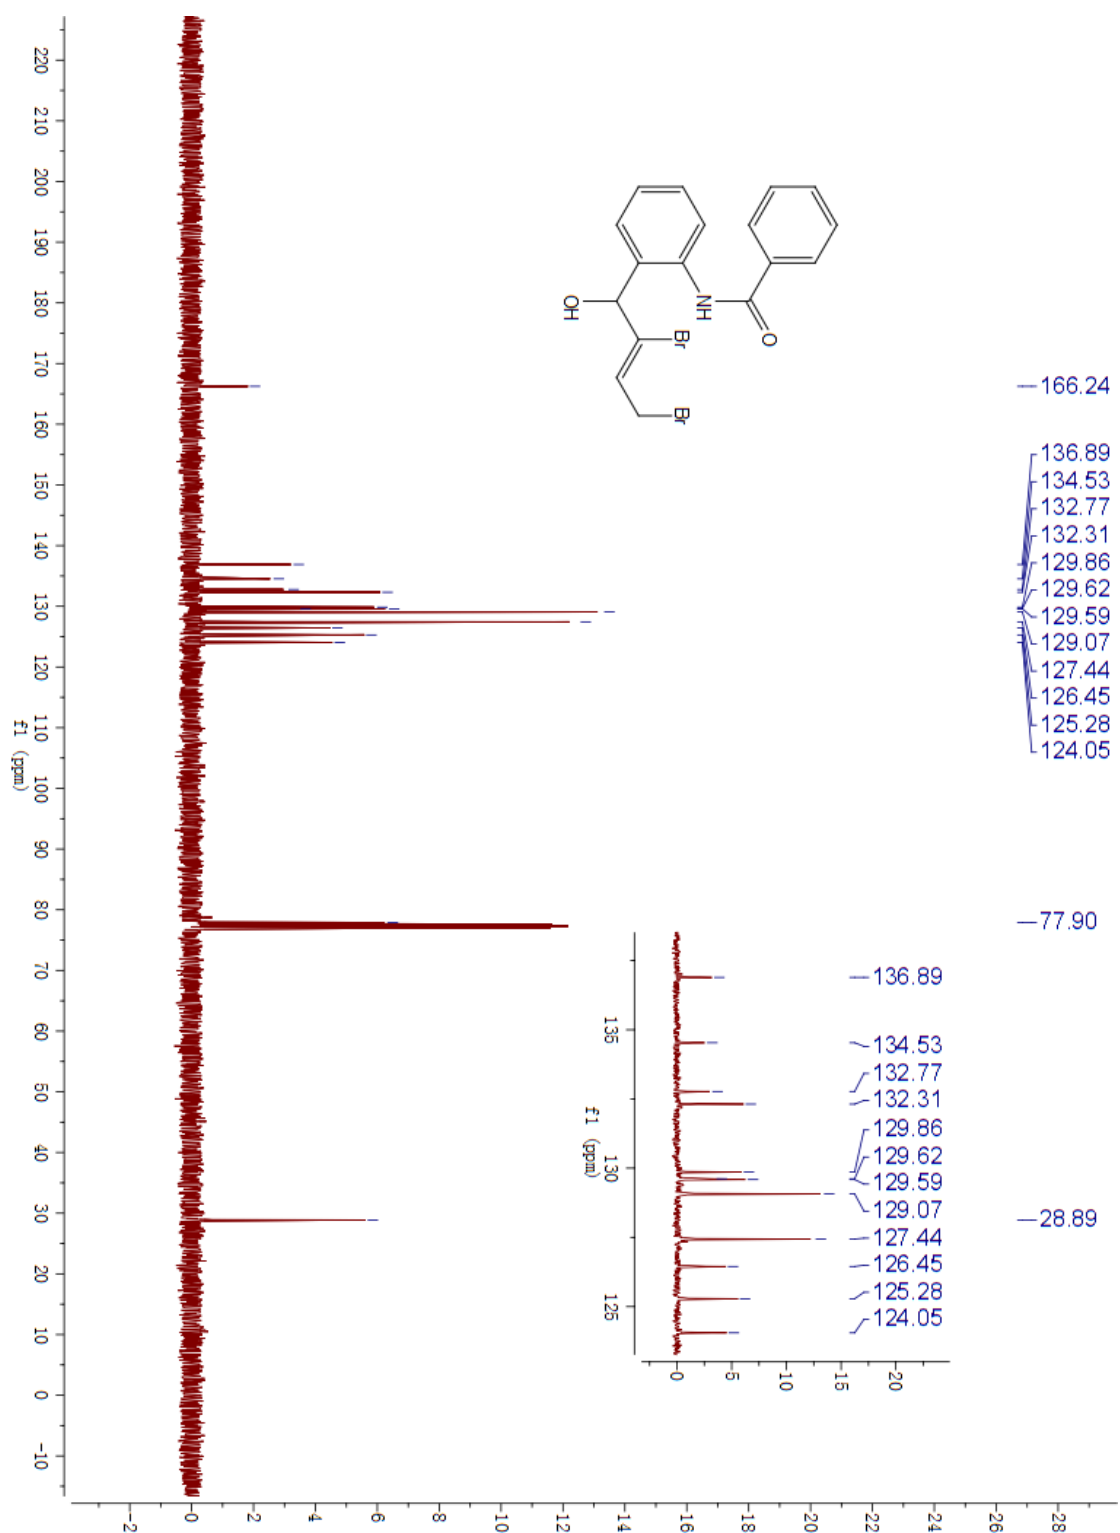

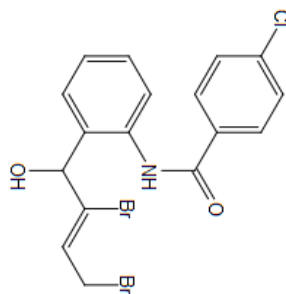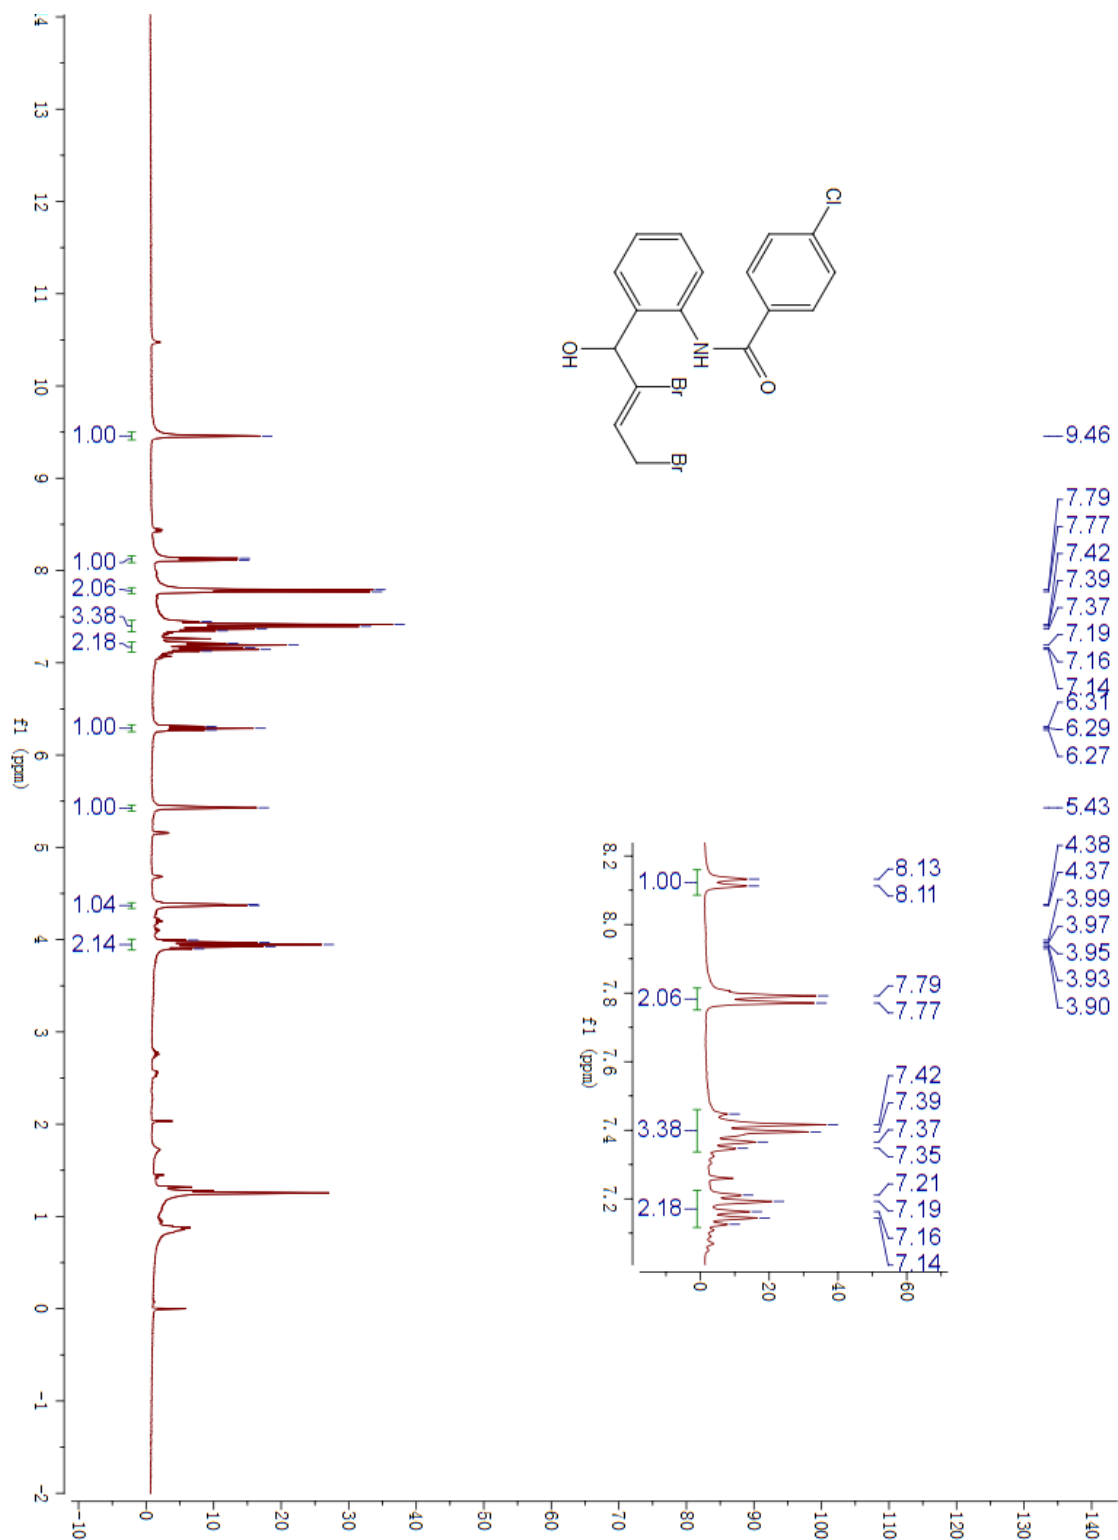

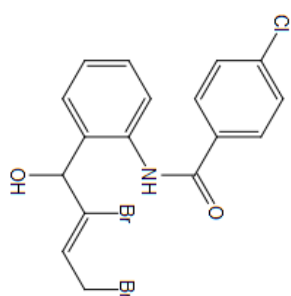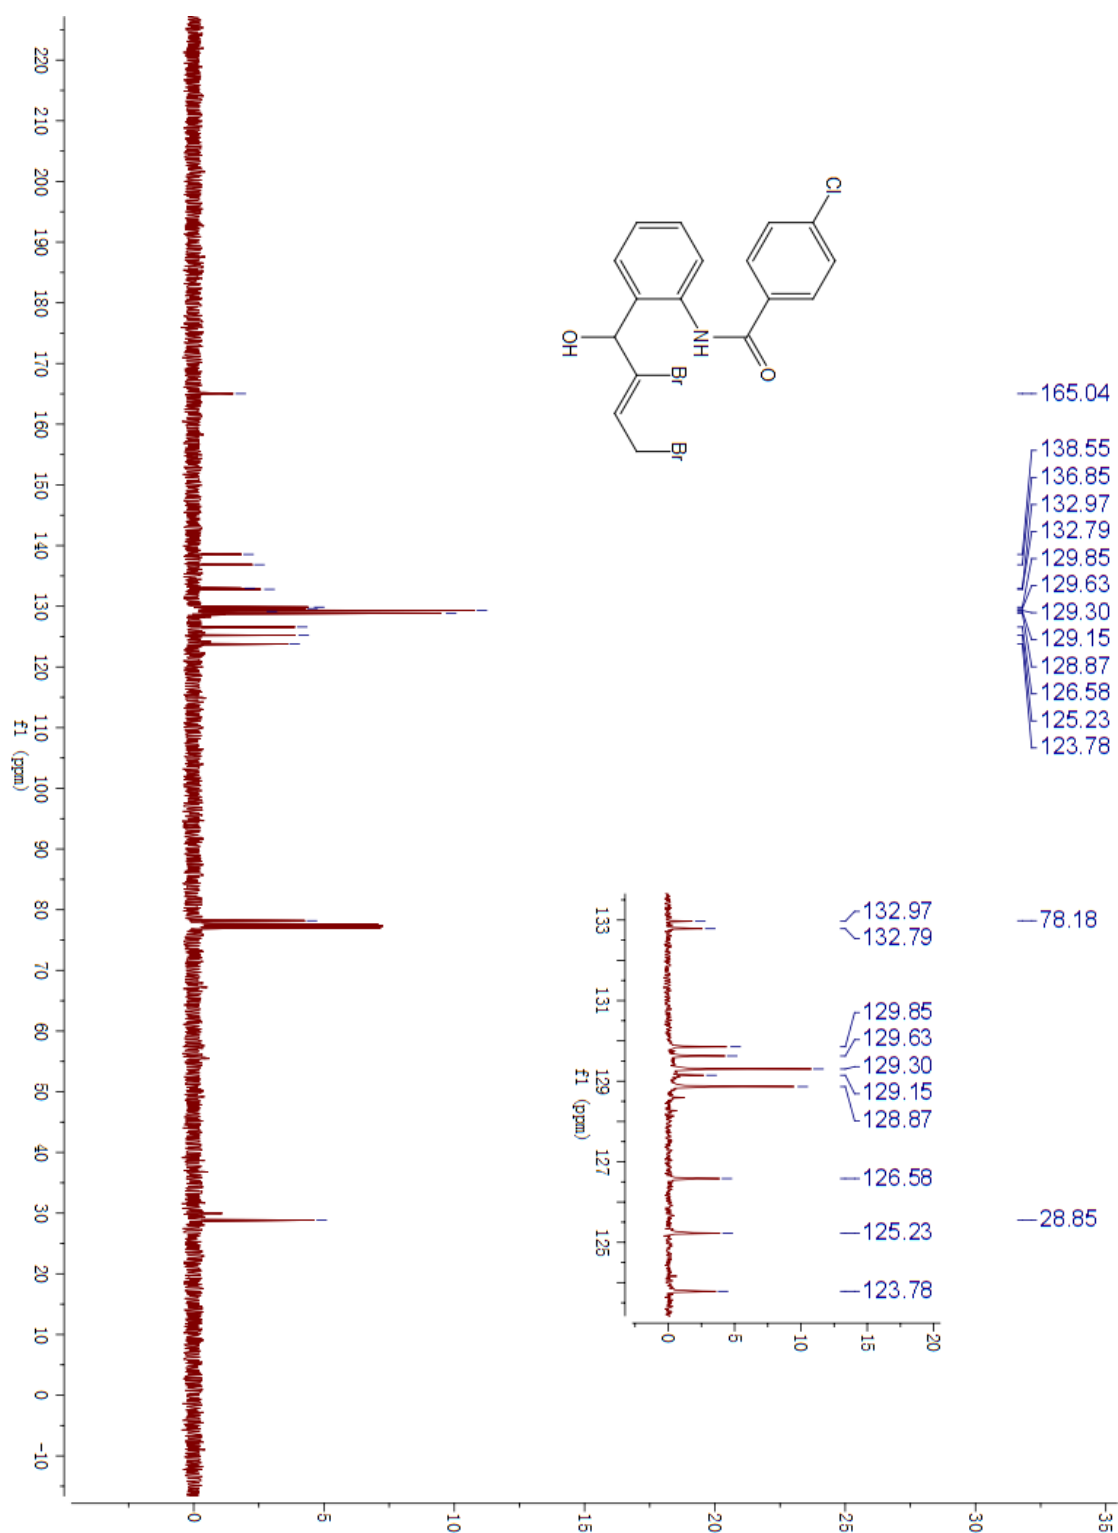

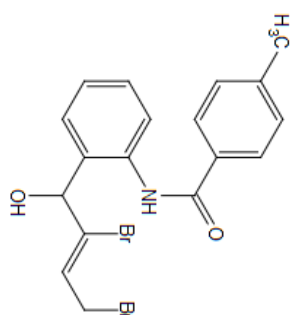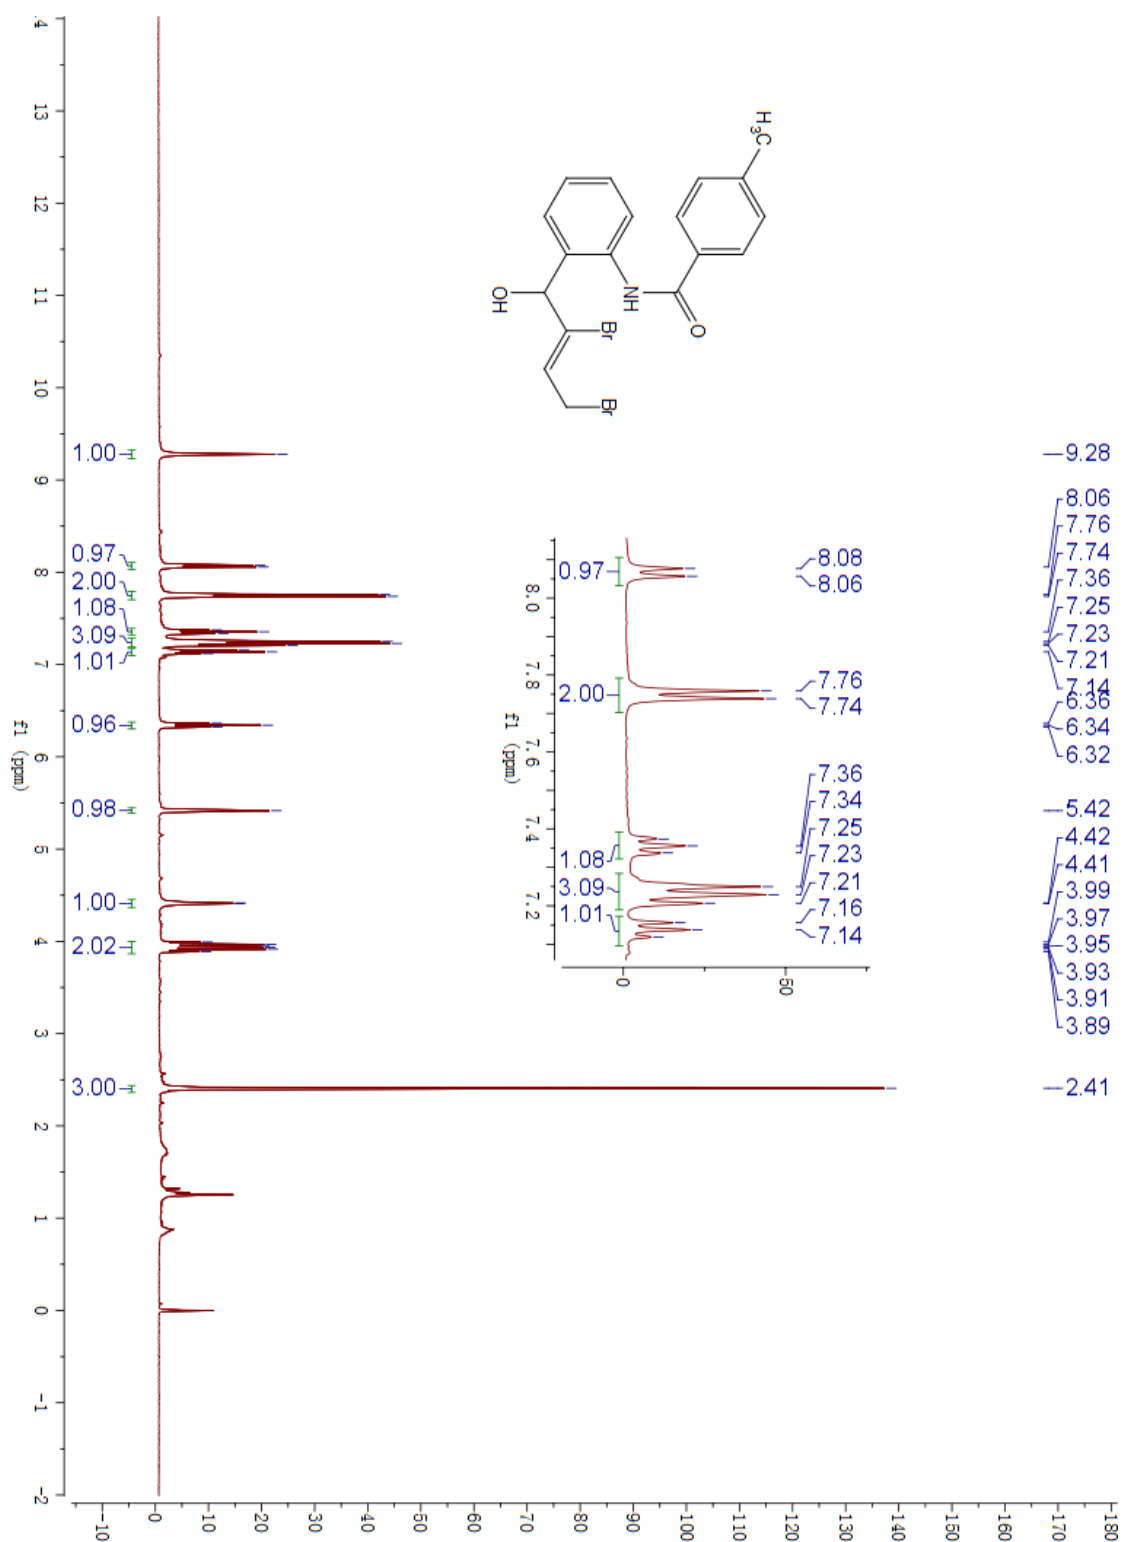

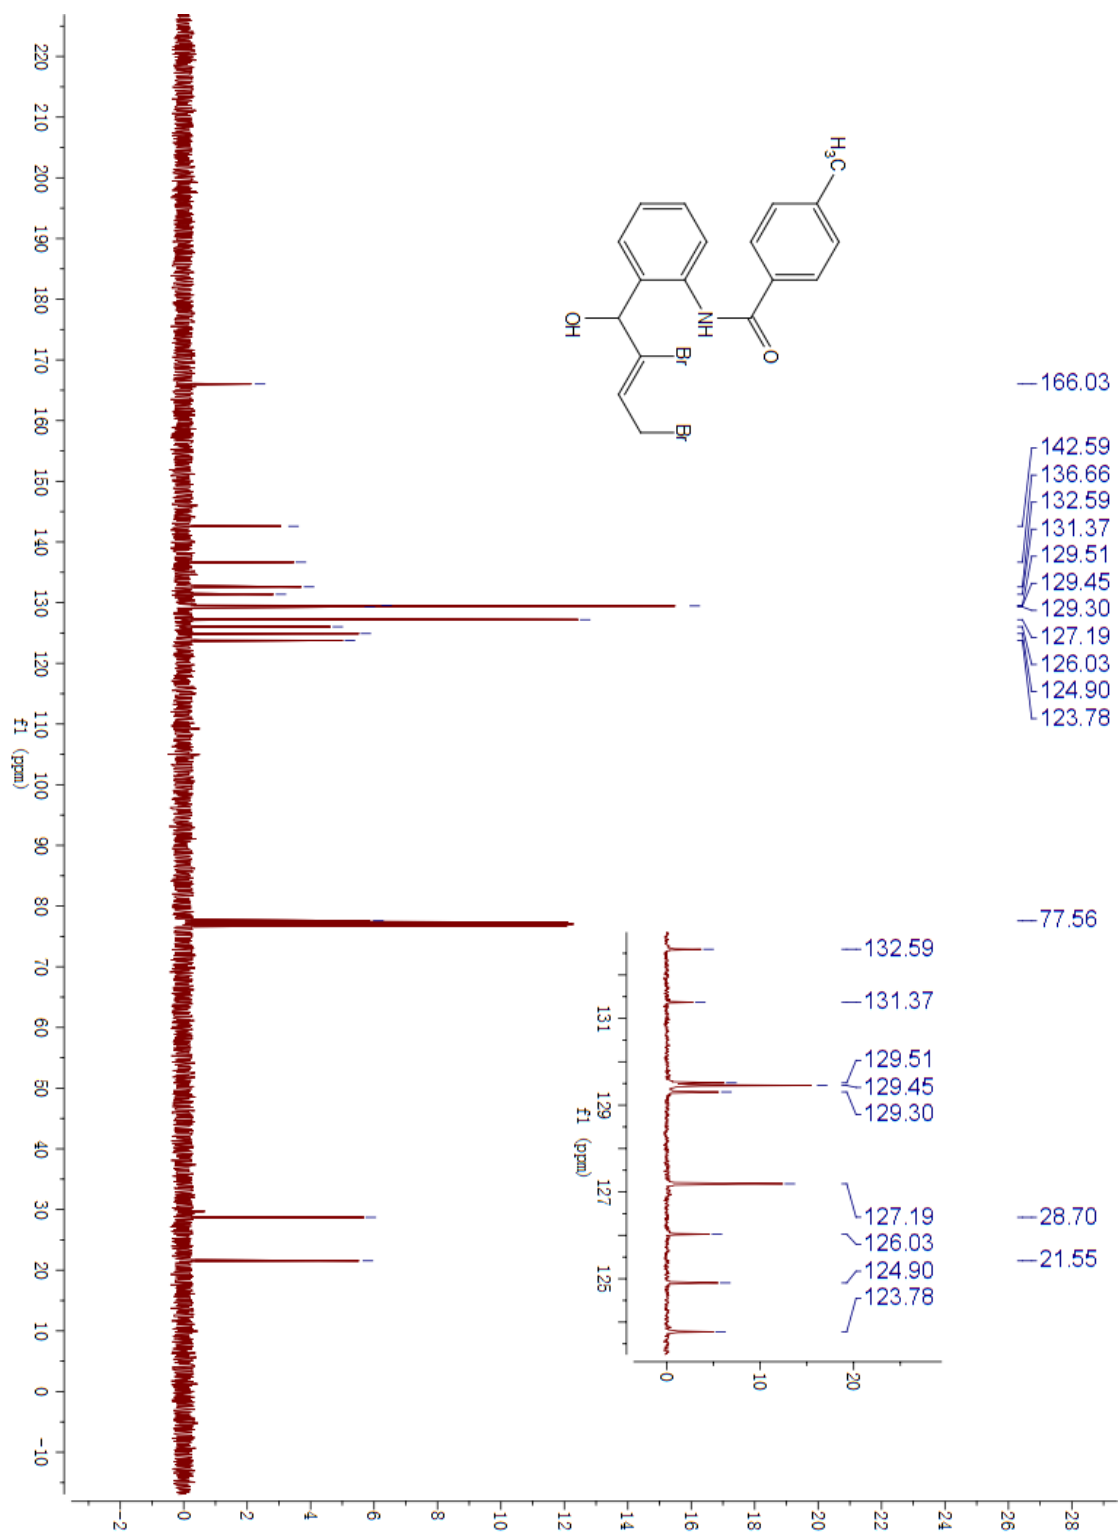

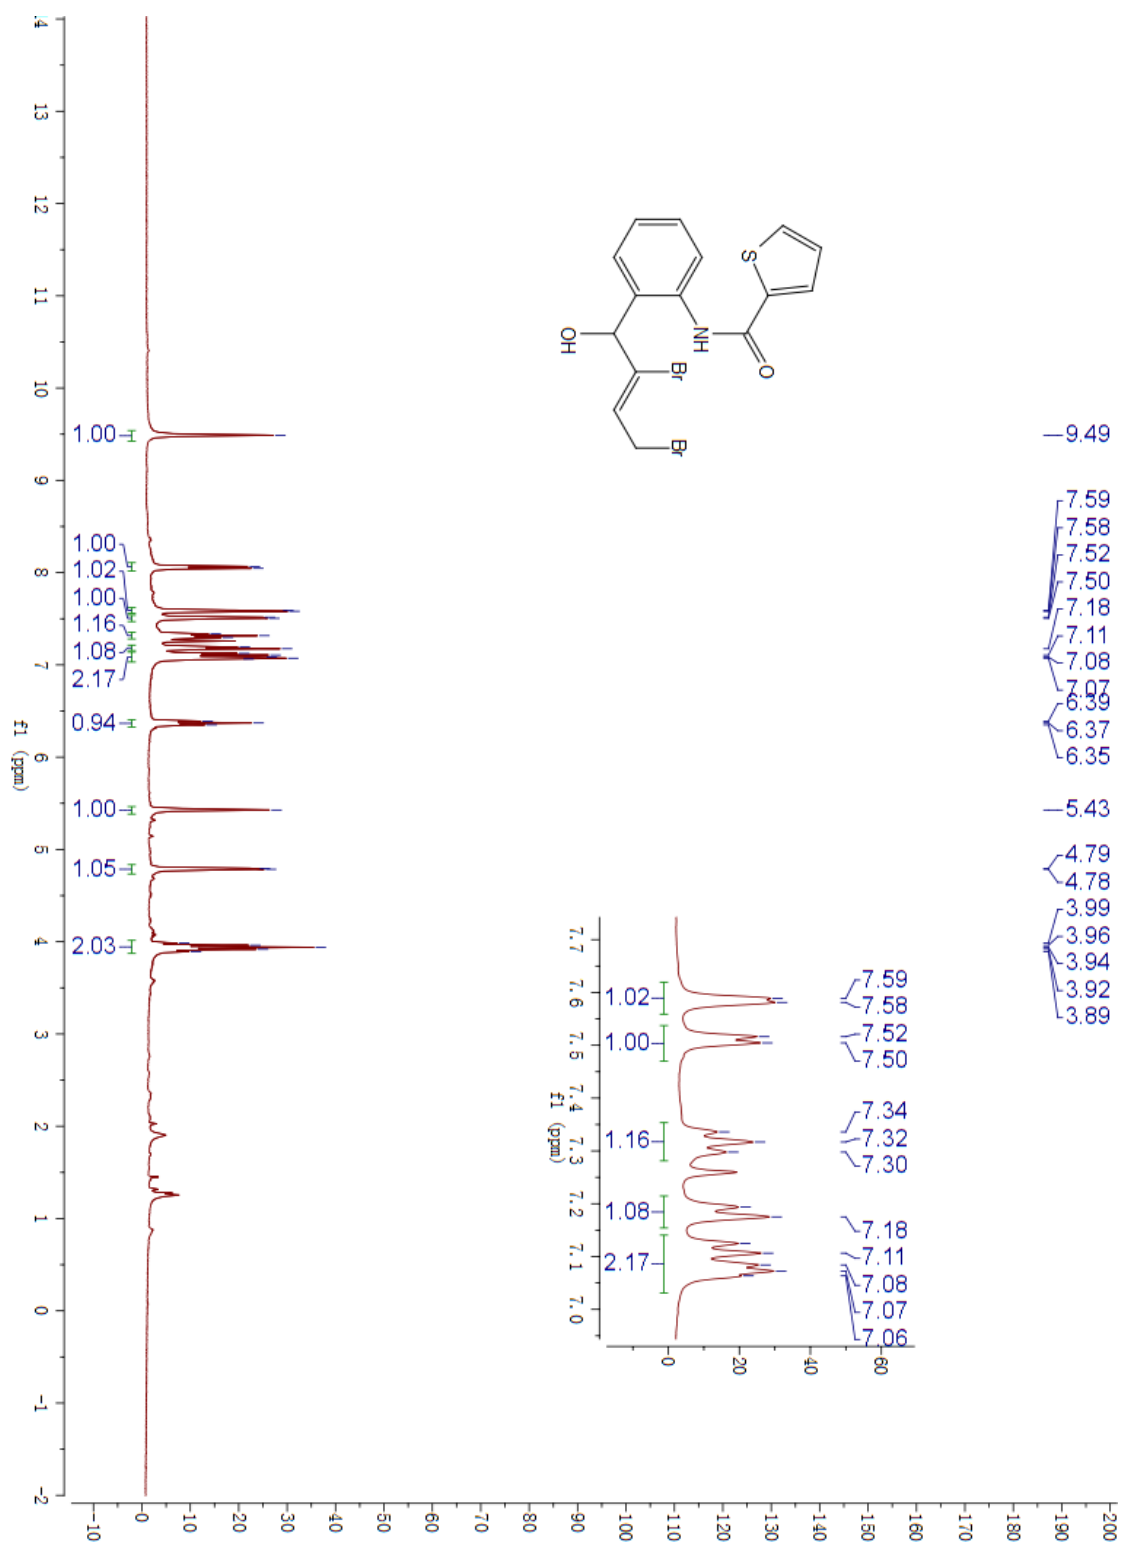

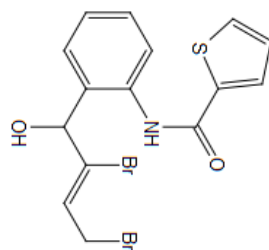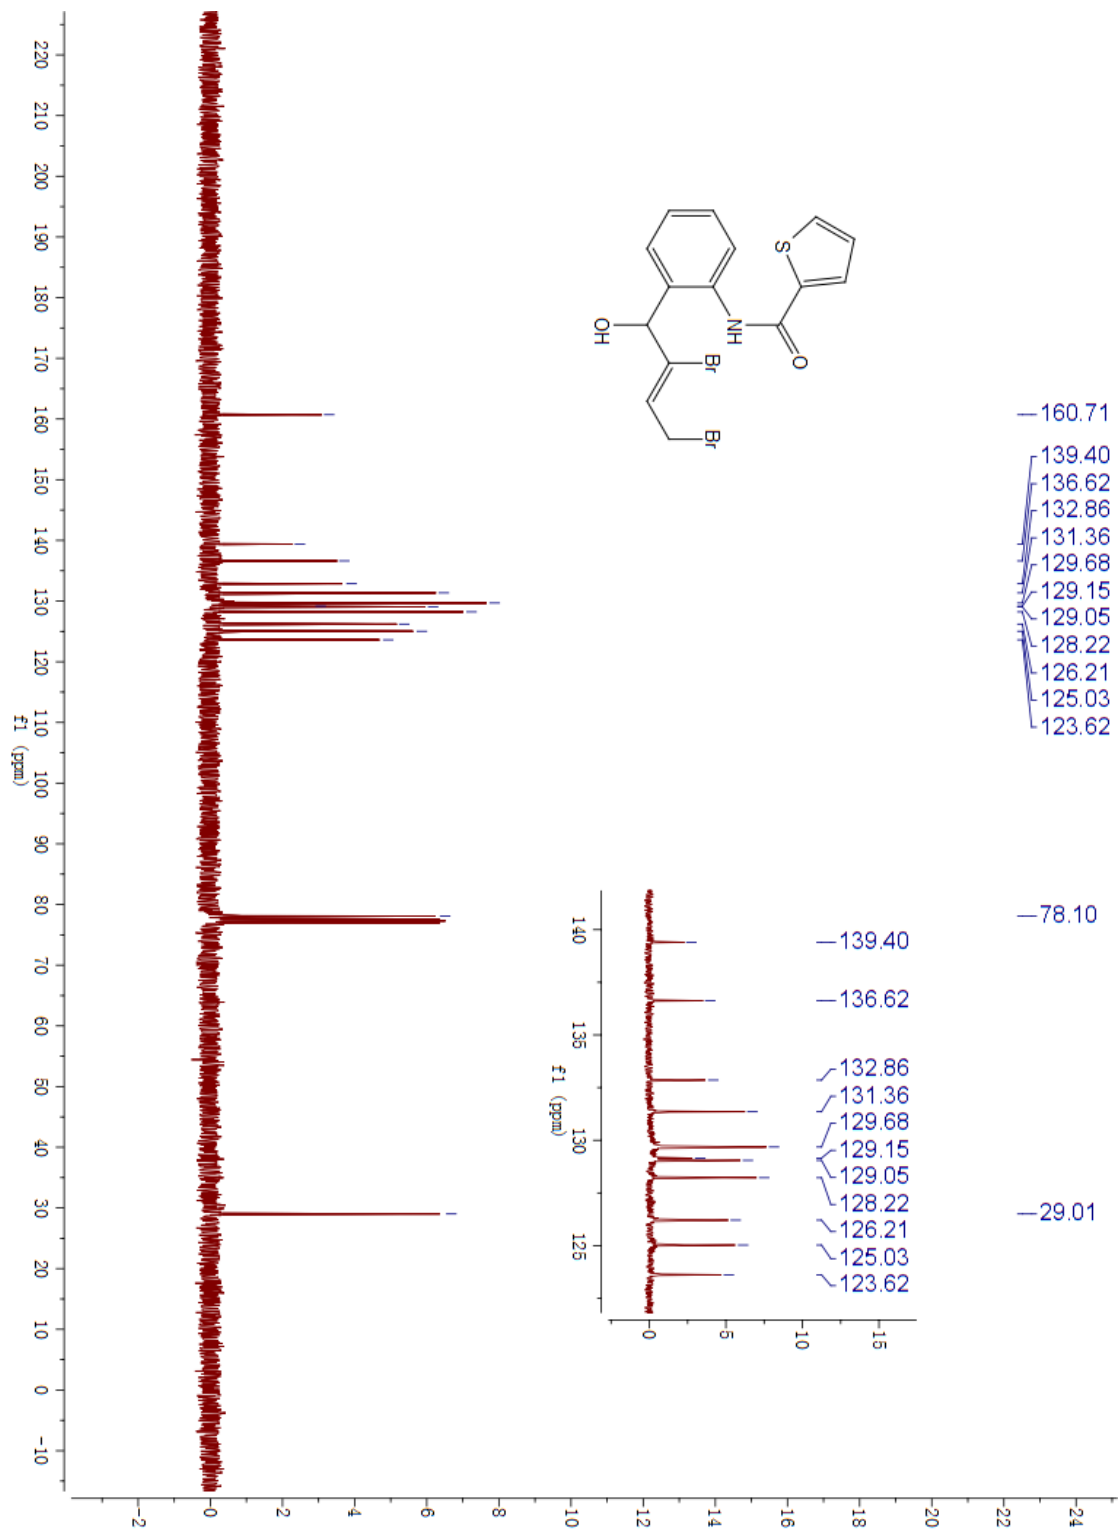

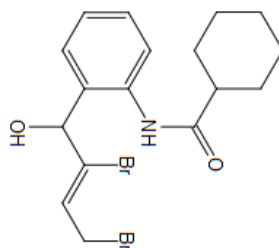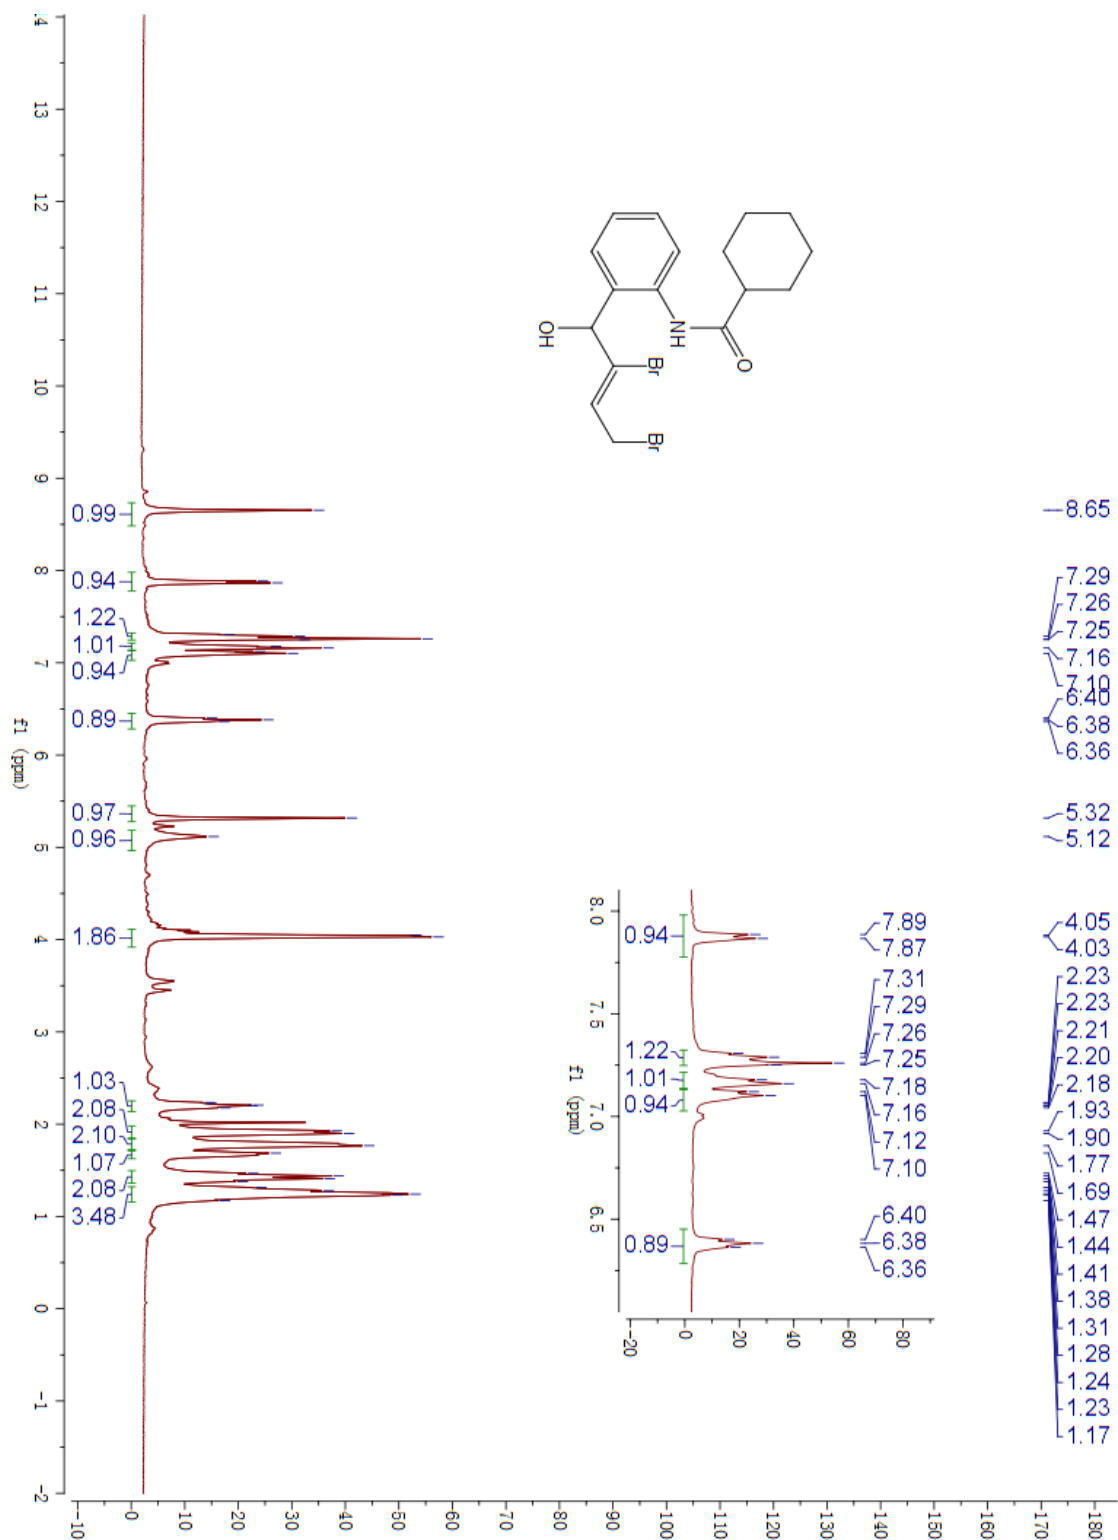

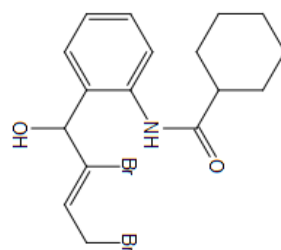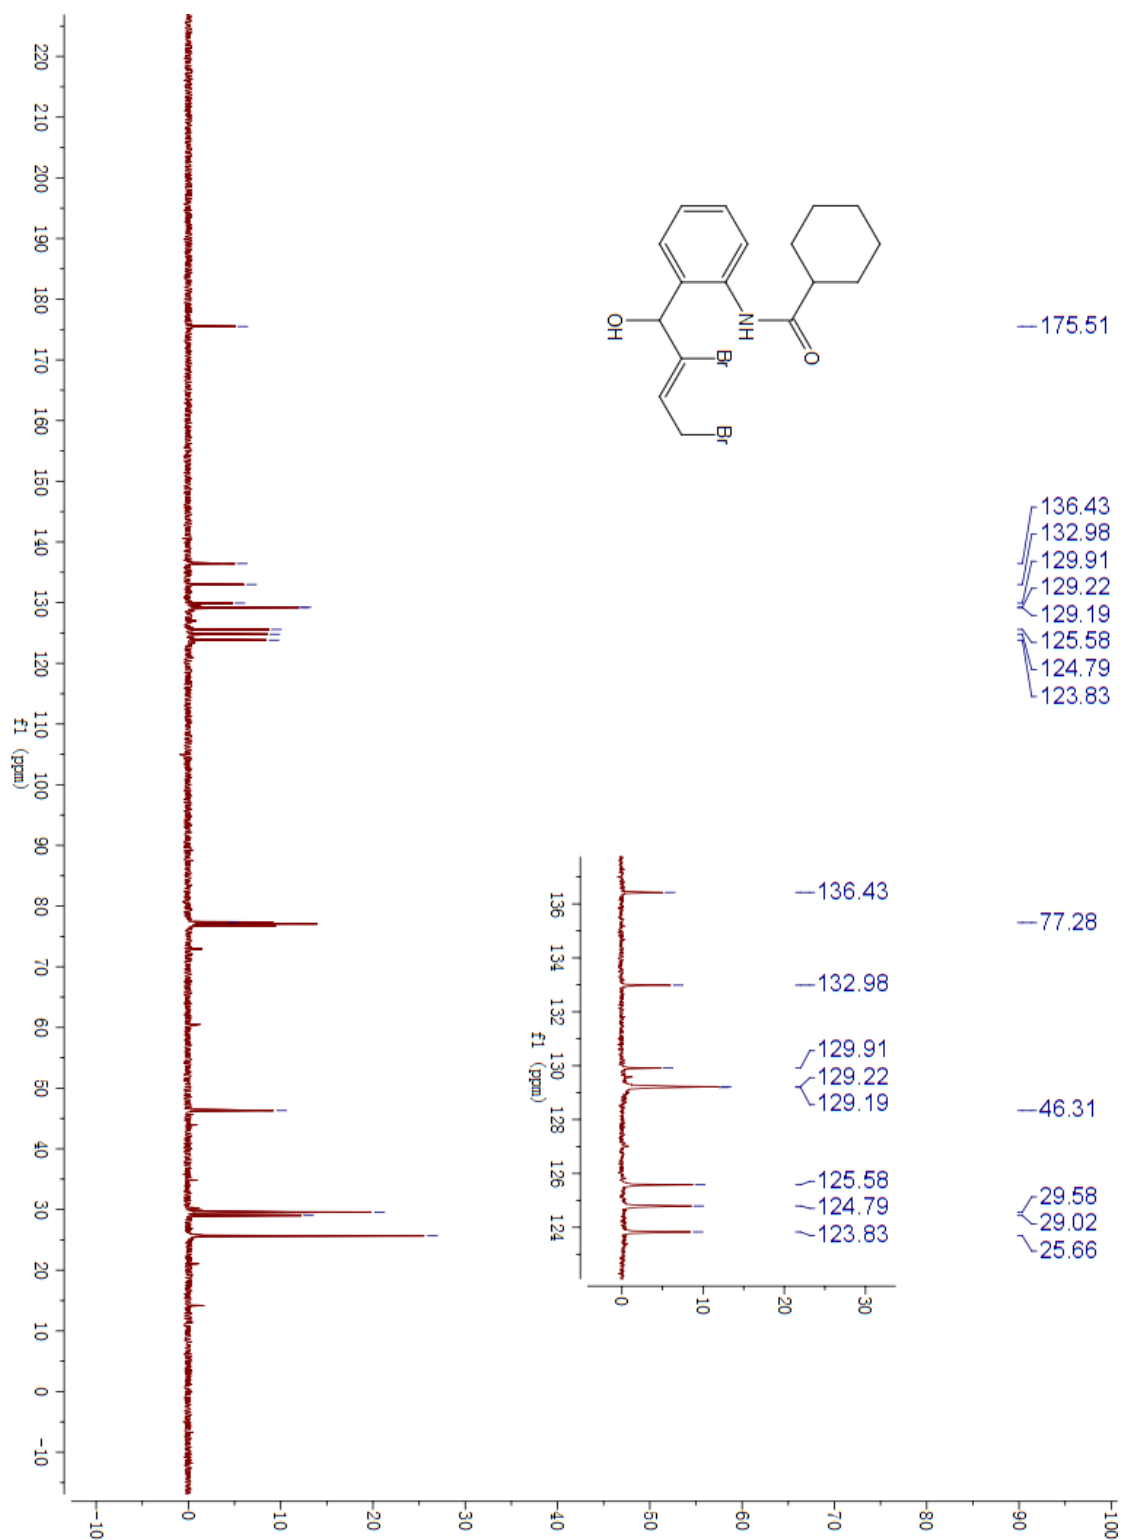

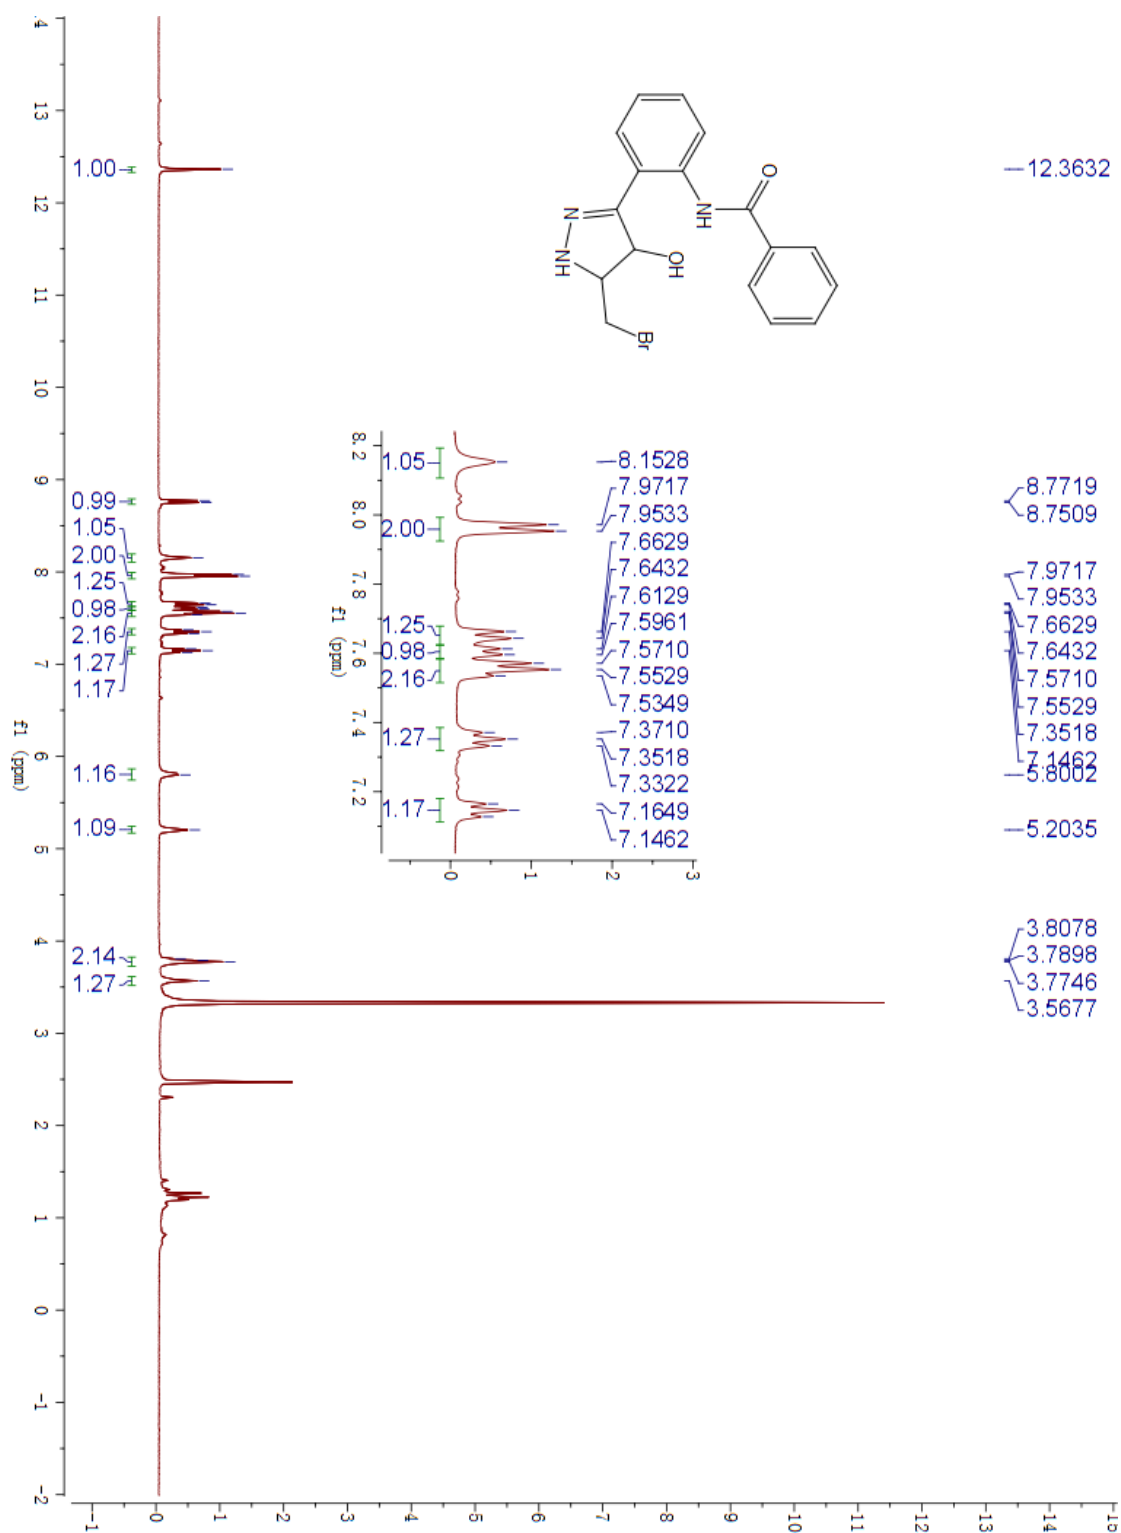

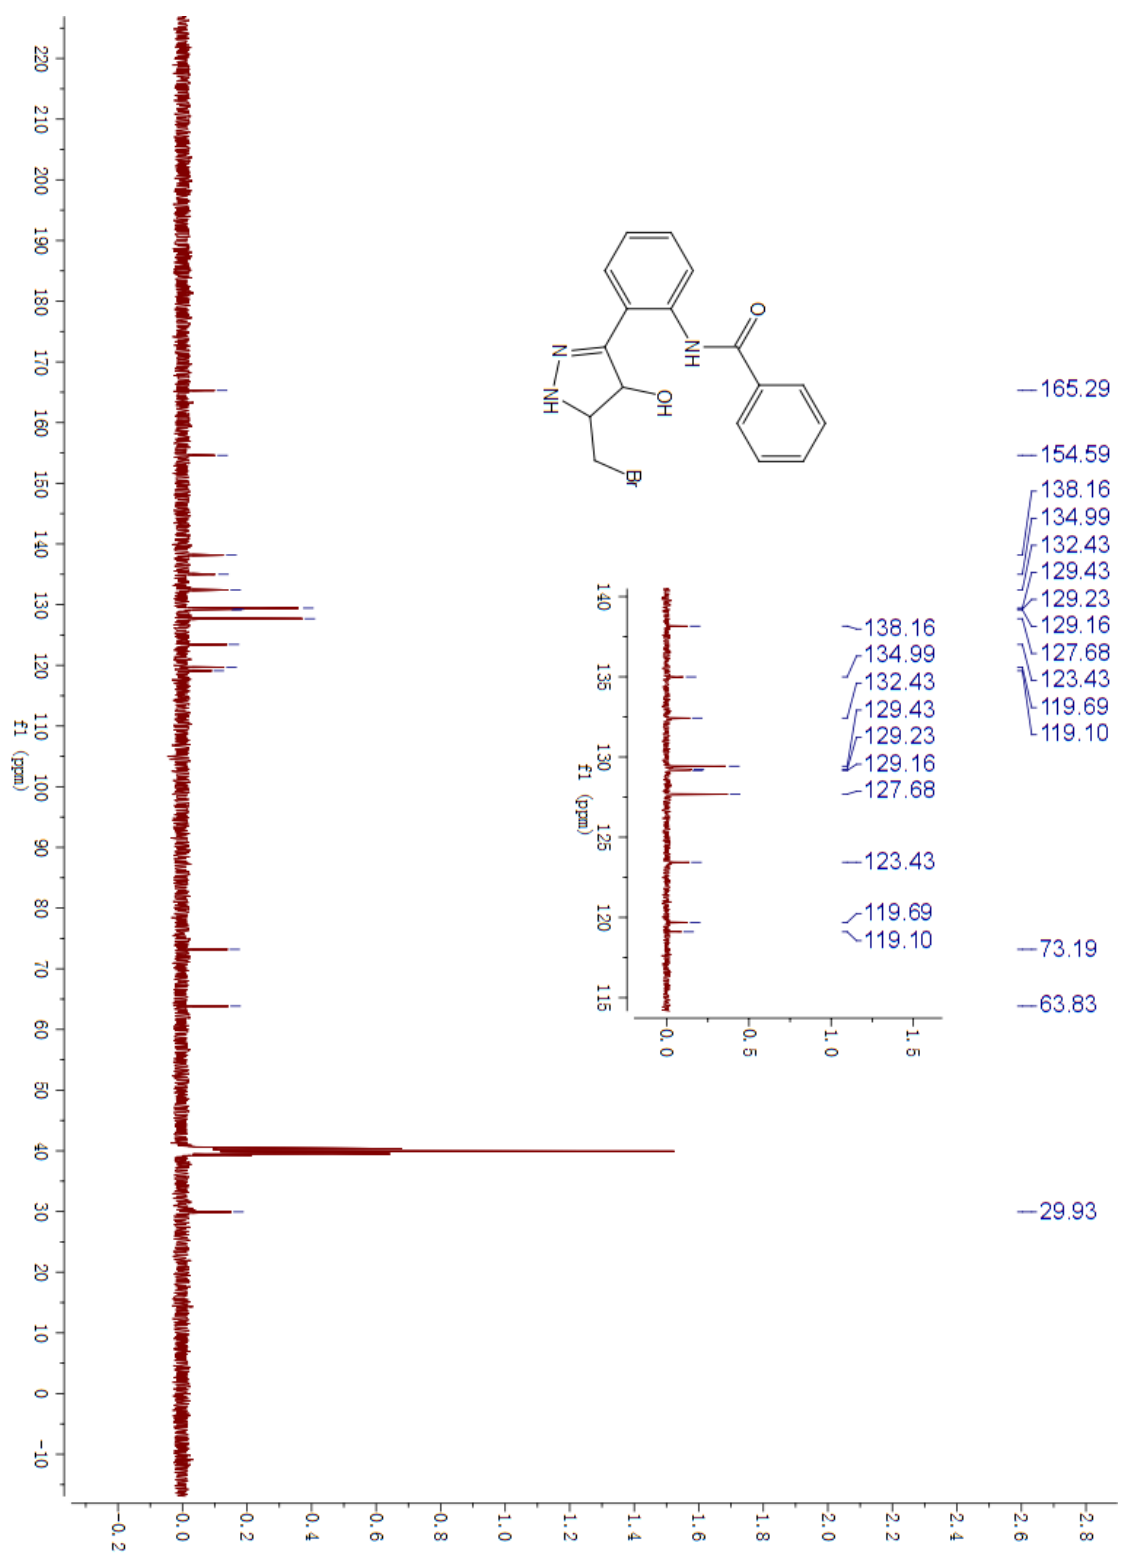

Supplement: c9qo00540d1.pdf [file c9qo00540d1.pdf]
